# Supplementary material for: From dynamic combinatorial ‘hit’ to lead: in vitro and in vivo activity of compounds targeting the pathogenic RNAs that cause myotonic dystrophy
Source: PubMed Central journal article supplement — Nucleic Acids Res. 2012 Apr 6;40(13):6380–90. doi: 10.1093/nar/gks298 (PMC3401475; doi:10.1093/nar/gks298), 2012-04-06
Supplement: supp_gks298_nar-03022-f-2011-File002.pdf [file supp_gks298_nar-03022-f-2011-File002.pdf]

**From Dynamic Combinatorial “Hit” to Lead: *In vitro* and *in vivo* activity of compounds targeting the pathogenic RNAs that cause myotonic dystrophy**

Leslie O. Ofori, Jason Hoskins, Masayuki Nakamori, Charles A. Thornton, and Benjamin L. Miller\*

Departments of Dermatology, Chemistry, and Medicine, University of Rochester,  
Rochester, New York 14642

Benjamin\_miller@urmc.rochester.edu

**Supplementary information**

**INDEX:**

|                                                                                                                                                                                  |         |
|----------------------------------------------------------------------------------------------------------------------------------------------------------------------------------|---------|
| Reagents and Materials                                                                                                                                                           | S2      |
| Synthesis of 2-ethyl Benzo[g]quinoline carboxylic acid ( <b>2</b> )                                                                                                              | S3-S5   |
| <sup>1</sup> H and <sup>13</sup> C NMR spectra for 3-nitropropanoate                                                                                                             | S7      |
| <sup>1</sup> H and <sup>13</sup> C NMR spectra 3-Nitro-2-naphthoic acid                                                                                                          | S8      |
| <sup>1</sup> H and <sup>13</sup> C NMR spectra (3-nitronaphthalen-2-yl) methanol                                                                                                 | S9      |
| <sup>1</sup> H and <sup>13</sup> C NMR spectra 3-nitro-2-naphthaldehyde                                                                                                          | S10     |
| <sup>1</sup> H NMR, and <sup>13</sup> C NMR spectra 2-ethyl benzo[g]quinoline carboxylic acid                                                                                    | S11     |
| FT-IR spectrum of 2-ethyl benzo[g]quinoline carboxylic acid                                                                                                                      | S12     |
| Procedure for SPPS and olefin metathesis synthesis, <sup>1</sup> H and <sup>13</sup> C NMR, FT-IR, HRMS spectra, and HPLC traces of compounds <b>3</b> , <b>4</b> and <b>5</b> . | S13-S25 |
| Preparation, <sup>1</sup> H and <sup>13</sup> C NMR, FT-IR, and HRMS spectra of <b>Fmoc-monomer</b> , compounds <b>6</b> and <b>7</b>                                            | S26-S35 |
| Preparation, <sup>1</sup> H and <sup>13</sup> C NMR, FT-IR, HRMS spectra, and HPLC traces of <b>Scrambled monomer</b> , compounds <b>8</b> and <b>9</b>                          | S36-S46 |
| Synthesis of L-Fmoc-pentenylglycine                                                                                                                                              | S47-S49 |
| Preparation, HPLC Purification and separation of <b>Extended monomer</b> compound <b>10</b> and <b>11</b>                                                                        | S49-S51 |
| <sup>1</sup> H and <sup>13</sup> C NMR, FT-IR spectra, and HRMS data of L-Fmoc-Pentenylglycine                                                                                   | S52-S54 |
| <sup>1</sup> H and <sup>13</sup> C NMR, FT-IR spectra, and HRMS data of <b>Extended monomer</b> , compounds <b>10</b> and <b>11</b>                                              | S55-S63 |
| Experimental Protocol for SPR binding measurement of compounds to RNA sequences                                                                                                  | S64-S65 |
| Supplementary Tables 1–15: SPR binding result of compound <b>3</b> , <b>4</b> and <b>5</b> to the RNA sequences studied.                                                         | S66-S80 |
| Supplementary Tables 16-24: SPR binding results of <b>6</b> and <b>7</b> to RNA sequences                                                                                        | S81-S89 |
| Supplementary Tables 25-33: SPR binding results of <b>8</b> and <b>9</b> to RNA                                                                                                  | S90-S98 |

|                                                                                                                                             |           |
|---------------------------------------------------------------------------------------------------------------------------------------------|-----------|
| sequences                                                                                                                                   |           |
| Supplementary Tables 34-42: SPR binding results of <b>10</b> and <b>11</b> to RNA sequences                                                 | S99-S107  |
| Supplementaary Table 43-44: SPR binding results of neomycin to (CUG) <sub>10</sub> and (CCUG) <sub>10</sub> RNA                             | S108-S109 |
| Comparison of binding stoichiometry of <b>5</b> and <b>10</b> to (CUG) <sub>10</sub> by SPR (Supp. Fig. 2)                                  | S110      |
| Procedure for binding analysis by fluorescence titration                                                                                    | S111      |
| Determination of relative fluorescence quantum yield of <b>2</b> (Supp. Fig. 3)                                                             | S112      |
| Fluorescence binding measurements of <b>3</b> , <b>4</b> , <b>5</b> and <b>10-11</b> to unlabeled (CUG) <sub>10</sub> RNA (Supp. Figs. 4-6) | S114-S116 |
| Cell permeation assessment of compounds <b>2</b> , <b>4</b> , <b>9</b> and <b>11</b> (Supp. Fig. 7-10)                                      | S117-S119 |
| Toxicity of <b>2</b> , <b>4</b> , and <b>5</b> in human fibroblasts (Supp. Figs 10, 11)                                                     | S119-S120 |
| Total protein measurement (Bradford assay) of C5-14 and C1-S cells incubated with <b>4</b> (Supp. Figs. 12, 13)                             | S121      |
| Preliminary mouse experiments with compound <b>11</b> (Supp. Fig. 14)                                                                       | S122      |
| Supplementary references                                                                                                                    | S123      |

**Reagents and Materials.** Commercially available reagents were obtained from Sigma Aldrich Chemical Co. (St. Louis, MO), TCI America (Portland, OR) Fisher Scientific, EMD Chemicals (Gibbstown, NJ) Advanced ChemTech (Louisville, KY) and Alfa Aesar and were used without further purification unless otherwise noted. Water used for reactions and aqueous workup was glass-distilled from a deionized water feed. Reagent grade solvents were used for all non-aqueous extractions. Reaction progress was monitored by analytical thin-layer chromatography (TLC) using EM silica gel 60 F-254 precoated glass plates (0.25 mm). Compounds were visualized on the TLC plates with a UV lamp (dual wavelength;  $\lambda=254$  nm,  $\lambda=360$  nm). Synthesized compounds were purified using flash column chromatography on EM silica gel 60 (230-400) mesh or alternatively via preparative reversed phase HPLC. Cell were cultured in Dulbecco's modified Eagle's medium (DMEM (GIBCO Cat# 11995)), supplemented with 10 % FBS and 1% pen-strep. MTT used for viability studies was purchased from CHEMICON, Inc.

**Analysis.** <sup>1</sup>H NMR spectra were recorded at 25 °C on either a Bruker Avance 400 (400 MHz) or Bruker Avance 500 (500 MHz) instrument and processed using MestReNova NMR processing software. Chemical shifts ( $\delta$ ) are reported in parts per million (ppm)

downfield from tetramethylsilane and referenced to the residual protium signal in the NMR solvents ( $D_2O$ ,  $\delta = 4.79$ ). Data are reported as follows: chemical shift, multiplicity (s = singlet, d = doublet, t = triplet, m = multiplet and q = quartet), coupling constant ( $J$ ) in Hertz (Hz) and integration.  $^{13}C$  spectra were recorded at 25 °C on a Bruker Avance 500 instrument operating at 126 MHz. Chemical shifts ( $\delta$ ) are reported in ppm downfield from tetramethylsilane and referenced (except in  $D_2O$ ) to the primary carbon resonance in the NMR solvent. FT-IR spectra were recorded on Shimadzu FT-IR spectrophotometer. High-resolution mass spectra (HRMS) were acquired at the university of Buffalo chemistry department mass spectrometry facility, Buffalo, NY or at the mass spectrometry facility of the University of California, Riverside. Low resolution mass spectra were recorded on Shimadzu LC/MS 2010 with APCI or electrospray ionization.

### SYNTHESIS OF COMPOUNDS:

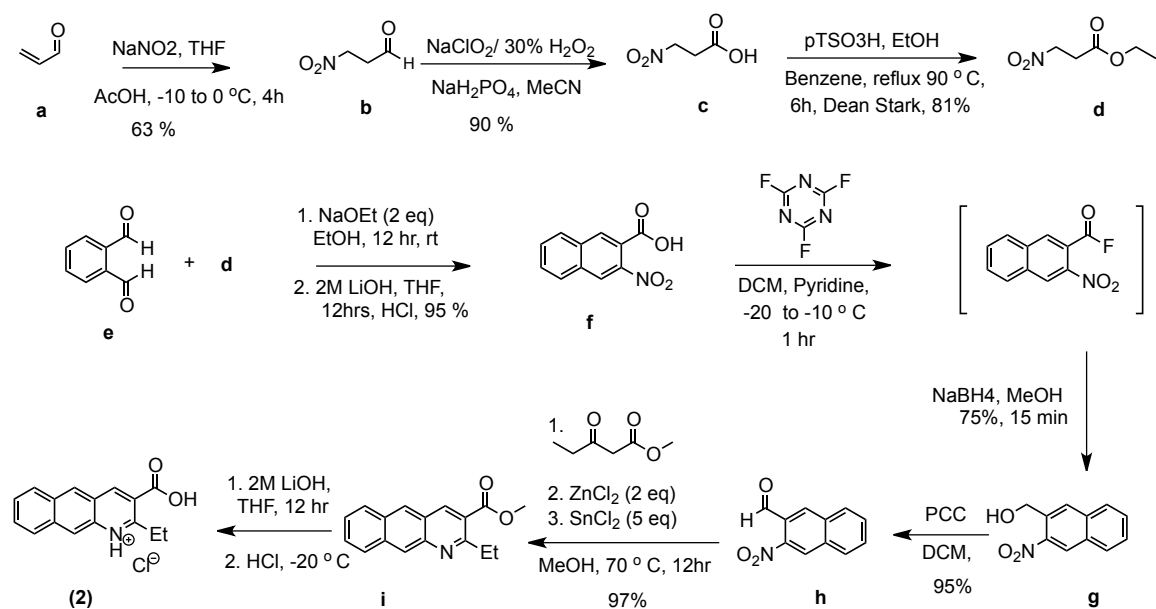

**Supplementary Scheme 1.** Synthesis of 2-ethyl benzo [g] quinoline carboxylic acid (**2**) starting from commercially available acrolein.

Ethyl-3-nitropropanoate (d) was prepared by following literature procedures<sup>1</sup> starting from commercially available acrolein (a). Spectral data were comparable to those reported in the literature (**Supplementary Scheme 1 a-d**). Ethyl-3-nitropropanoate (d): <sup>1</sup>H NMR (400 MHz, CDCl<sub>3</sub>) δ: 4.62 - 4.39 (m, 2H), 4.03 (q, *J* = 7.1 Hz, 2H), 2.92 - 2.69 (m, 2H), 1.12 (t, *J* = 7.1 Hz, 3H). <sup>13</sup>C NMR (126 MHz, CDCl<sub>3</sub>) δ: 169.64, 69.72, 61.22, 30.84, and 13.82.

3-Nitro-2-naphthoic acid (f): was synthesized by reacting O-phthalaldehyde (e) with ethyl-3-nitropropionate using a method reported by Kienzel.<sup>2</sup> Spectral data were comparable to those reported in the literature. <sup>1</sup>H NMR (400 MHz, CD<sub>3</sub>OD) δ: 8.38 (s, 1H), 8.30 (s, 1H), 8.01 (dd, *J* = 8.1, 4.6 Hz, 2H), 7.74 - 7.64 (m, 3H). <sup>13</sup>C NMR (126 MHz, CD<sub>3</sub>OD) δ: 167.80, 146.75, 134.17, 133.47, 131.89, 130.36, 130.12, 129.61, 129.29, 124.94, 124.87. LRMS (ES-) calculated for C<sub>11</sub>H<sub>6</sub>NO<sub>4</sub> (M-H)<sup>-</sup> 216 found 216.

(3-Nitronaphthalen-2-yl) methanol (g) was prepared from (f) via a one-pot procedure for the conversion of carboxylic acids into alcohols<sup>3</sup>. Briefly, an oven dried two-neck round bottom flask equipped with a mechanical stirrer and a thermometer was cooled under N<sub>2</sub> gas. Pyridine (1.113 mL, 13.8 mmol) was added to a stirred solution of 3-nitro-2-naphthoic acid (3 g, 13.81 mmol) in dry CH<sub>2</sub>Cl<sub>2</sub>. The flask was cooled to -10 to -20 °C in an acetone/dry ice bath, and then cyanuric fluoride (3.73 g, 27.63 mmol) was added in one portion. The mixture was then stirred vigorously at -10 to -20 °C for 1 hour, diluted with CH<sub>2</sub>Cl<sub>2</sub> and then 50 mL of ice-cold water was added. The aqueous phase was extracted (1 x 100 mL) with CH<sub>2</sub>Cl<sub>2</sub> and dried over MgSO<sub>4</sub>. The solvent was concentrated under vacuum to a small volume (40 mL) in CH<sub>2</sub>Cl<sub>2</sub>, and then solid NaBH<sub>4</sub> (1.0451 g, 27.63 mmol) was added in one portion. Methanol (20 mL) was added in drops for over 15 minutes at ambient temperature. The reaction was quenched by addition of 50 mL 1 N aqueous H<sub>2</sub>SO<sub>4</sub>. The organic solvent was removed under vacuum and the aqueous phase diluted and extracted (2 x 40 mL) with ethyl acetate. The product was purified by flash column chromatography (silica gel) to yield 2.2 g (81%) of **g** as a bright yellow compound. <sup>1</sup>H NMR (400 MHz, CD<sub>3</sub>OD) δ: 8.56 (s, 1H), 8.14 (s, 1H), 7.94 (dd, *J* = 24.5, 8.1 Hz, 2H), 7.61 (dt, *J* = 28.6, 7.1 Hz, 2H), 5.01 (s, 2H). <sup>13</sup>C NMR (126 MHz, CD<sub>3</sub>OD)

$\delta$ : 147.14, 136.41, 134.23, 132.55, 130.67, 130.22, 129.17, 128.87, 128.70, 126.50, 62.41.  
LRMS (ES+) calculated for  $C_{11}H_{10}NO_4$   $[M+H]^+$ : 204 found: 204.

3-nitro-2-naphthaldehyde (h): (3-nitronaphthalen-2-yl) methanol (3 g, 14.76 mmol) dissolved in 40 mL of dry  $CH_2Cl_2$  was added slowly to a stirred solution of pyridinium chlorochromate<sup>4</sup> (4.77 g, 22.15 mmol) and celite (4.77 g) in  $CH_2Cl_2$  under  $N_2$  atmosphere at room temperature. The reaction was monitored by TLC until none of the starting material remained, and then diluted with 50 mL of ethyl acetate and filtered through a pad of Florisil. The filtrate was concentrated under vacuum and the product was purified by column chromatography using 20 : 80 ethyl acetate : hexane to yield 2.8 g (99 %) of a yellow crystalline compound.  $^1H$  NMR (400 MHz,  $CDCl_3$ )  $\delta$ : 10.46 (s, 1H), 8.62 (s, 1H), 8.41 (s, 1H), 8.05 (dd,  $J = 8.5, 5.0$  Hz, 2H), 7.76 (dd,  $J = 6.2, 3.2$  Hz, 2H).  $^{13}C$  NMR (126 MHz,  $CDCl_3$ )  $\delta$ : 188.19, 145.77, 134.18, 133.59, 132.09, 130.62, 130.47, 129.78, 129.62, 127.88, 125.97. LRMS (ES+) calculated for  $C_{11}H_7NO_3$   $[M+H]^+$ : 202 found: 202.

2-ethylbenzo[g]quinoline-3-carboxylic acid (2): A flame dried 100 mL 3-neck round bottom flask was equipped with a teflon-coated stir bar, thermometer, and a reflux condenser with  $N_2$  inlet. The flask was charged with 1 g of 3 Å molecular sieves, 3-nitro-2-naphthaldehyde (1.5 g, 7.45 mmol), methyl propionylacetate (0.97 g, 7.45 mmol) and  $ZnCl_2$  (2.03g, 14.9 mmol). Anhydrous methanol (50 mL) was added, flushed with a stream of  $N_2$  and heated while stirring to an internal temperature of 70 °C for 1 hour. Next,  $SnCl_2$  (7.1 g, 37.25 mmol) was added slowly in 3 portions, after which the reaction was stirred at 70 °C and allowed to reflux for 12 hours. After cooling to room temperature, the reaction was made alkaline by the addition of 50 mL  $K_2CO_3$  (10 g dissolved in 50 mL of water) solution. Diethyl ether (50 mL) was added, and the mixture was then filtered through a pad of celite. The celite was washed (3 x 30 mL) with ether and the combined organics washed (3 x 50 mL) with brine and concentrated under vacuum to yield a red oily residue. This crude product was dissolved in 10 mL of THF and 40 mL of 2 M aqueous LiOH was added then stirred overnight at room temperature. After removal of the organic solvent under vacuum, the aqueous layer was chilled at -20

°C for 4 hours and then acidified to pH =1 with concentrated HCl. The precipitate formed was filtered, washed with 50 mL of water and dried under vacuum overnight to yield 1.7 g (94 %) of 2-ethylbenzo[g]quinoline-3-carboxylic acid as a yellow solid.

FT-IR (neat): 3375.2, 3358.8, 3341.44, 3319.75, 3052.62, 2936.42, 2539.11, 2521.27, 2447.5, 2159.16, 2097.93, 2026.56, 1974.01, 1880.95, 1876.13, 1690.97, 1686.15, 1670.72, 1661.56, 1638.42, 1634.56, 1583.45, 1536.2, 1458.08, 1405.53, 1278.72, 1254.61, 1232.43, 1183.25, 1141.78, 1084.4, 1053.06, 1053.06, 966.27, 898.28, 784.97, 751.22, 686.61, 619.59  $\text{cm}^{-1}$ .  $^1\text{H}$  NMR (500 MHz,  $\text{CD}_3\text{OD}$ )  $\delta$ : 9.89 (s, 1H), 9.13 (s, 1H), 8.83 (s, 1H), 8.32 (dd,  $J = 11.0, 8.7$  Hz, 2H), 7.85 (dddd,  $J = 9.5, 8.0, 6.7, 1.1$  Hz, 2H), 3.72 (q,  $J = 7.6$  Hz, 2H), 1.55 (t,  $J = 7.6$  Hz, 3H).  $^{13}\text{C}$  NMR (126 MHz,  $\text{CD}_3\text{OD}$ )  $\delta$ : 167.20, 165.48, 152.46, 138.34, 134.92, 134.57, 133.00, 132.10, 130.46, 129.78, 129.44, 125.22, 124.31, 118.99, 28.97, and 14.45.

HRMS  $m/z$  calculated for  $\text{C}_{16}\text{H}_{14}\text{NO}_2$   $[\text{M}+\text{H}]^+$ : 252.1019; found: 252.1012.

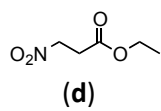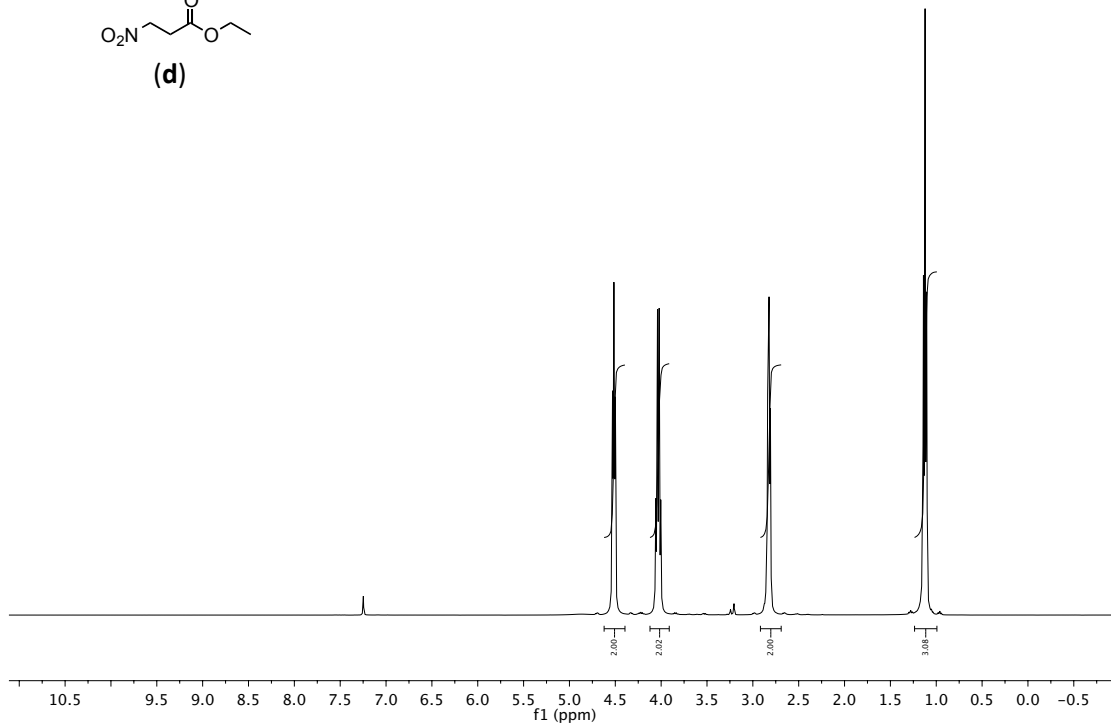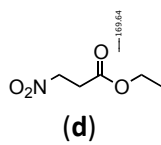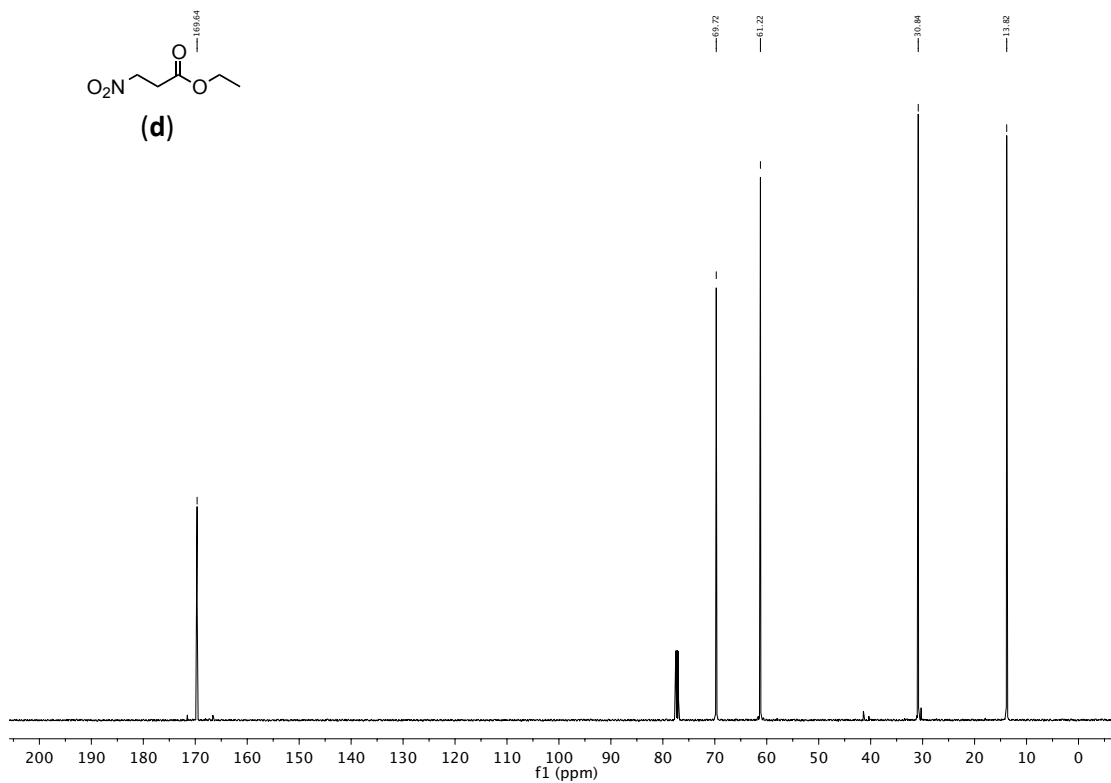

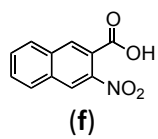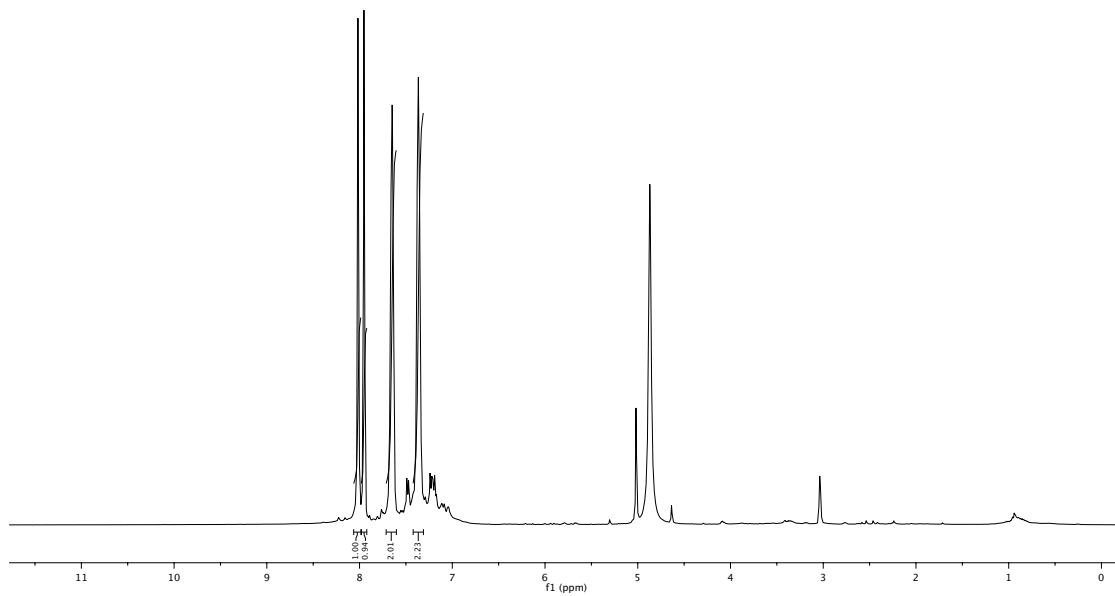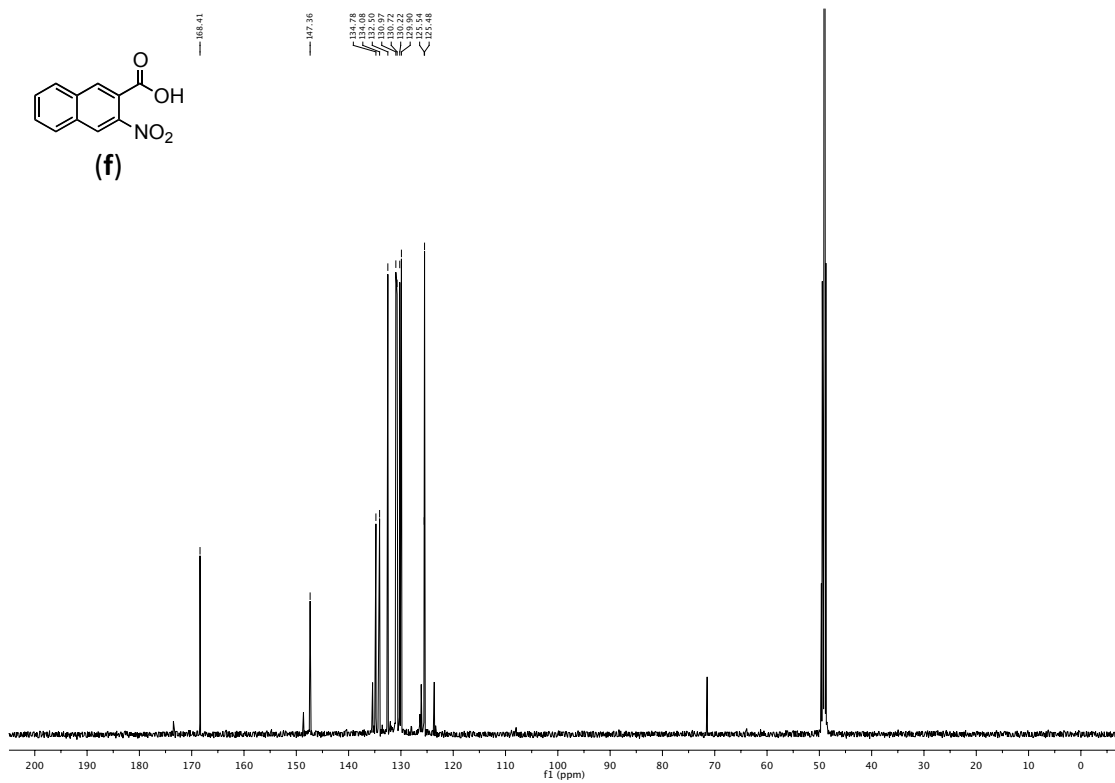



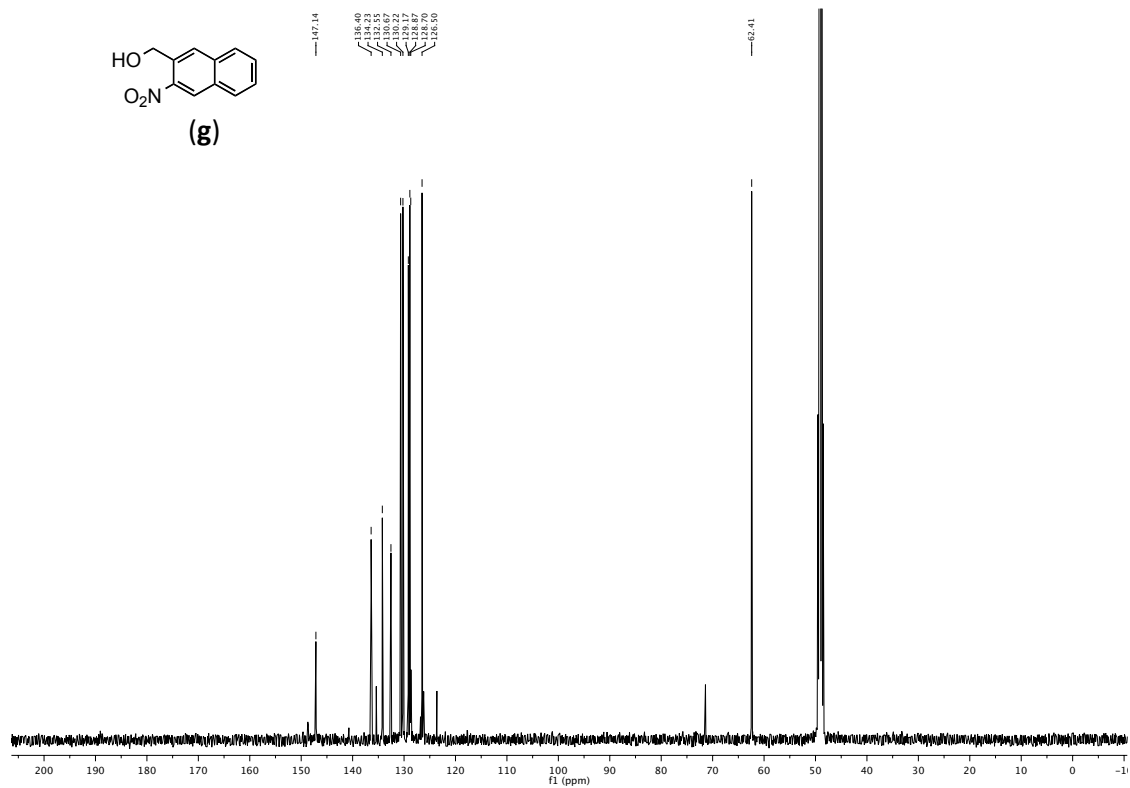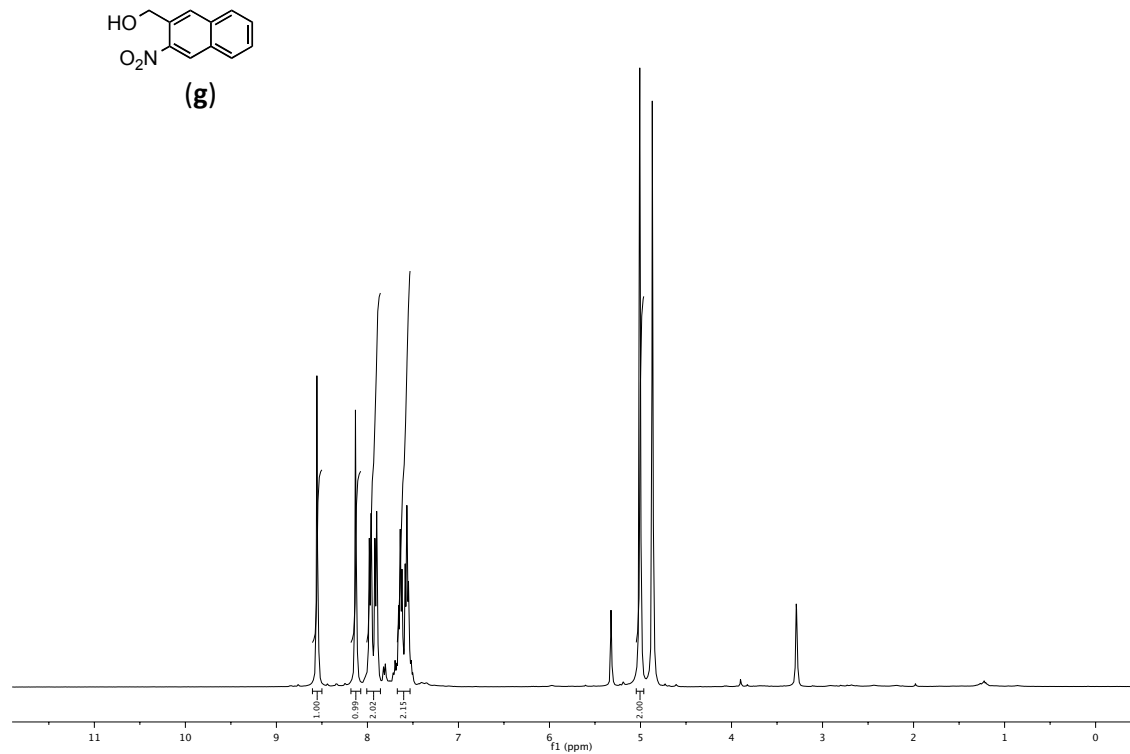

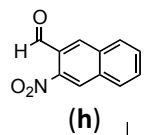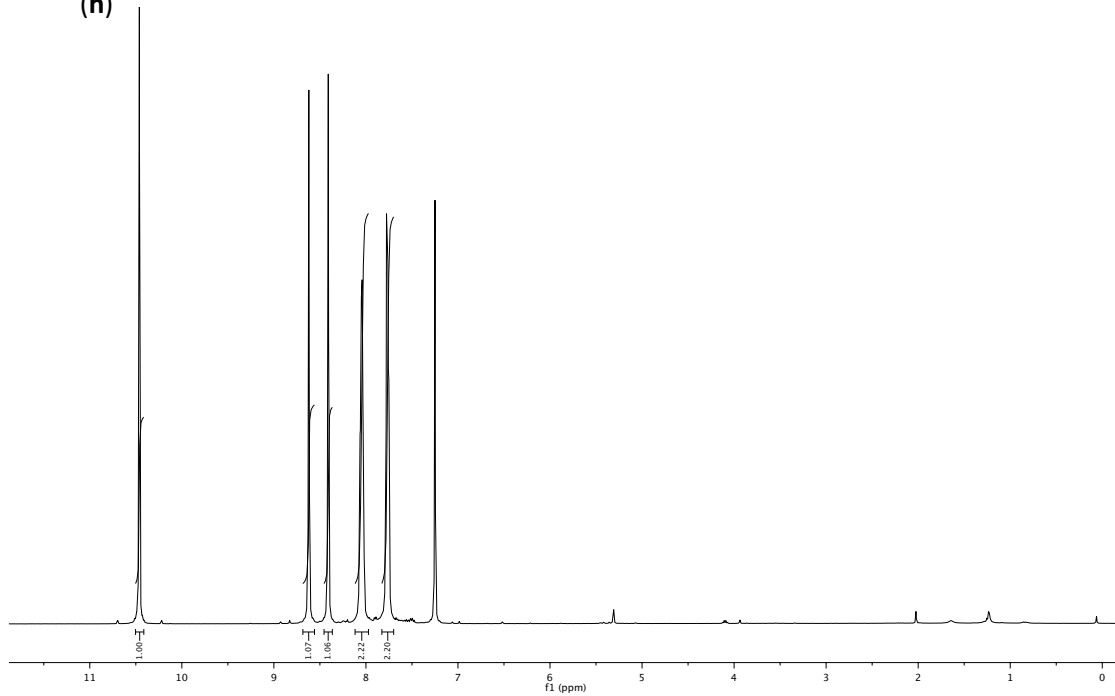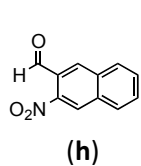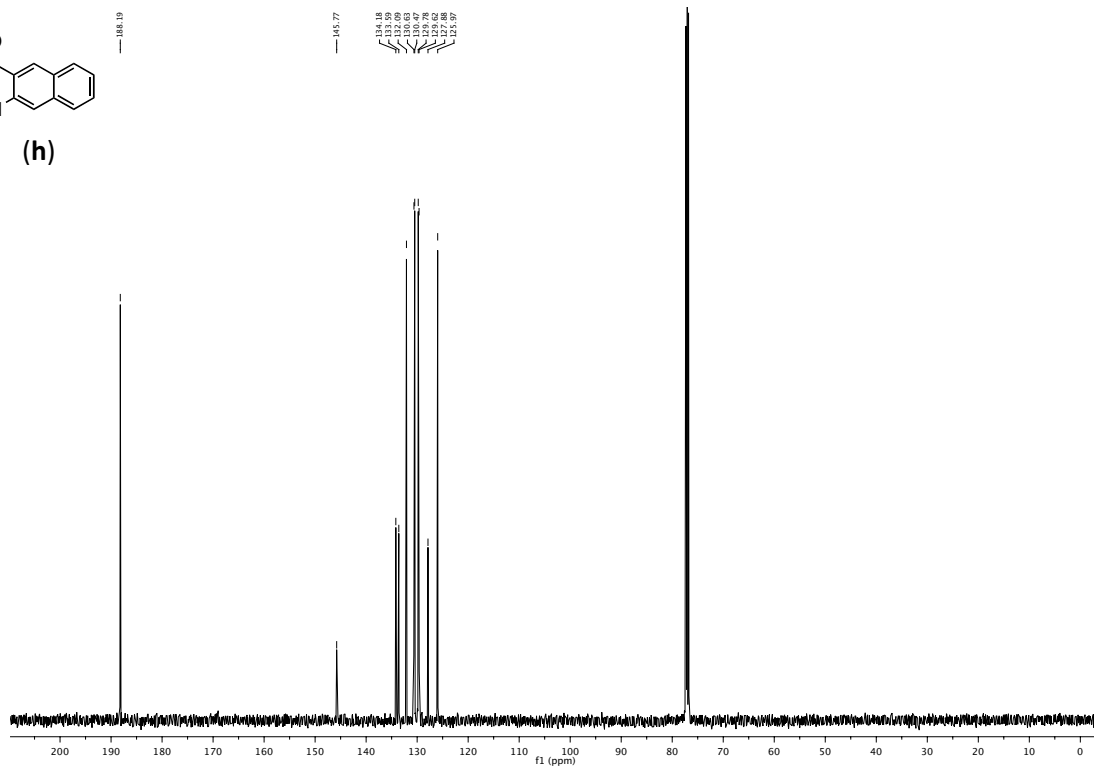

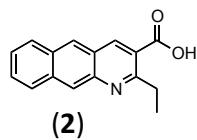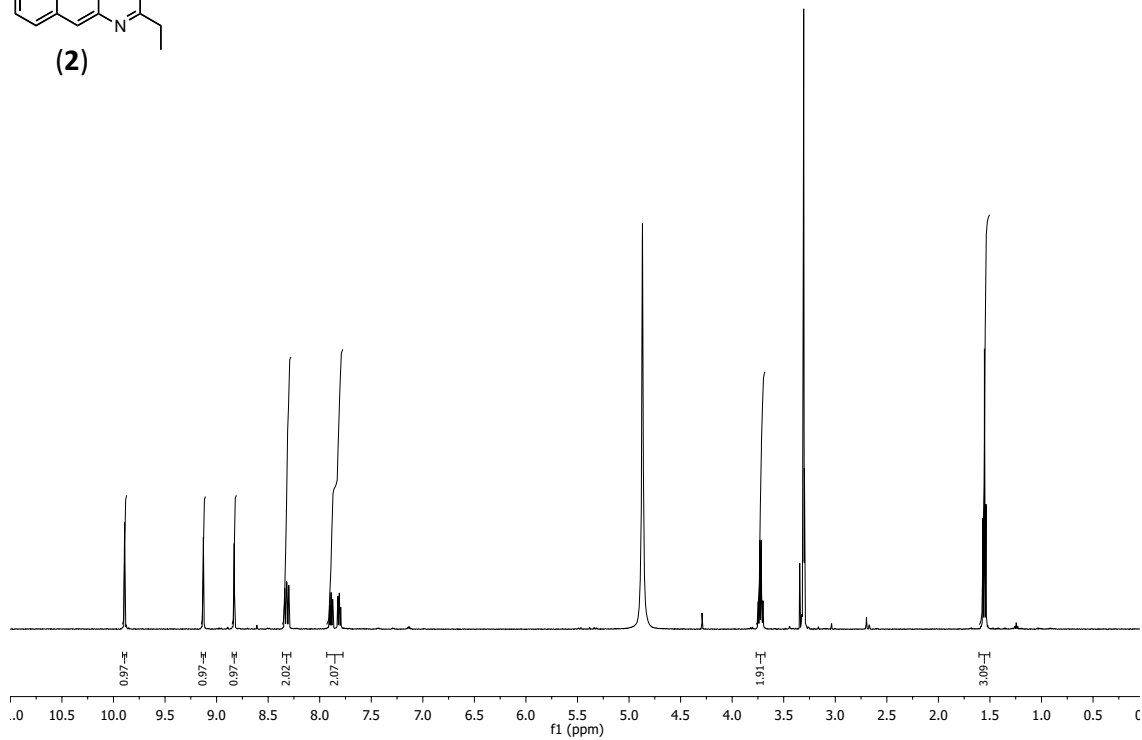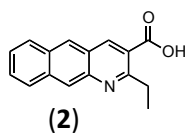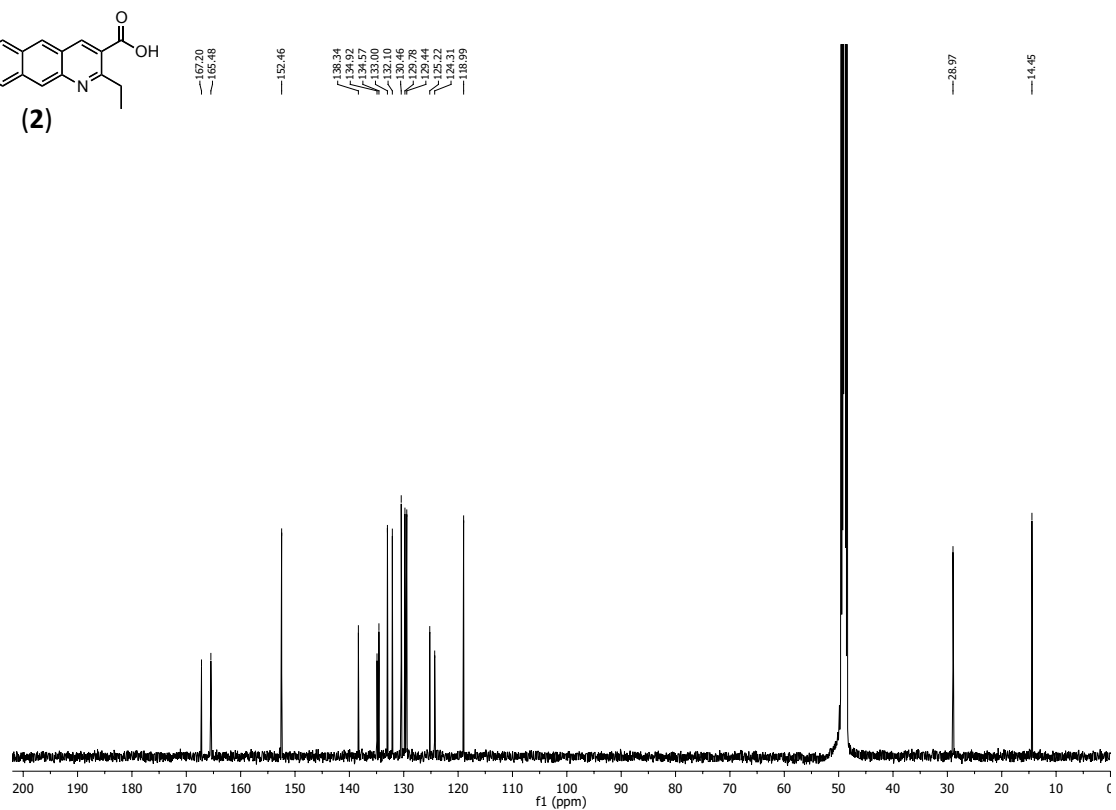

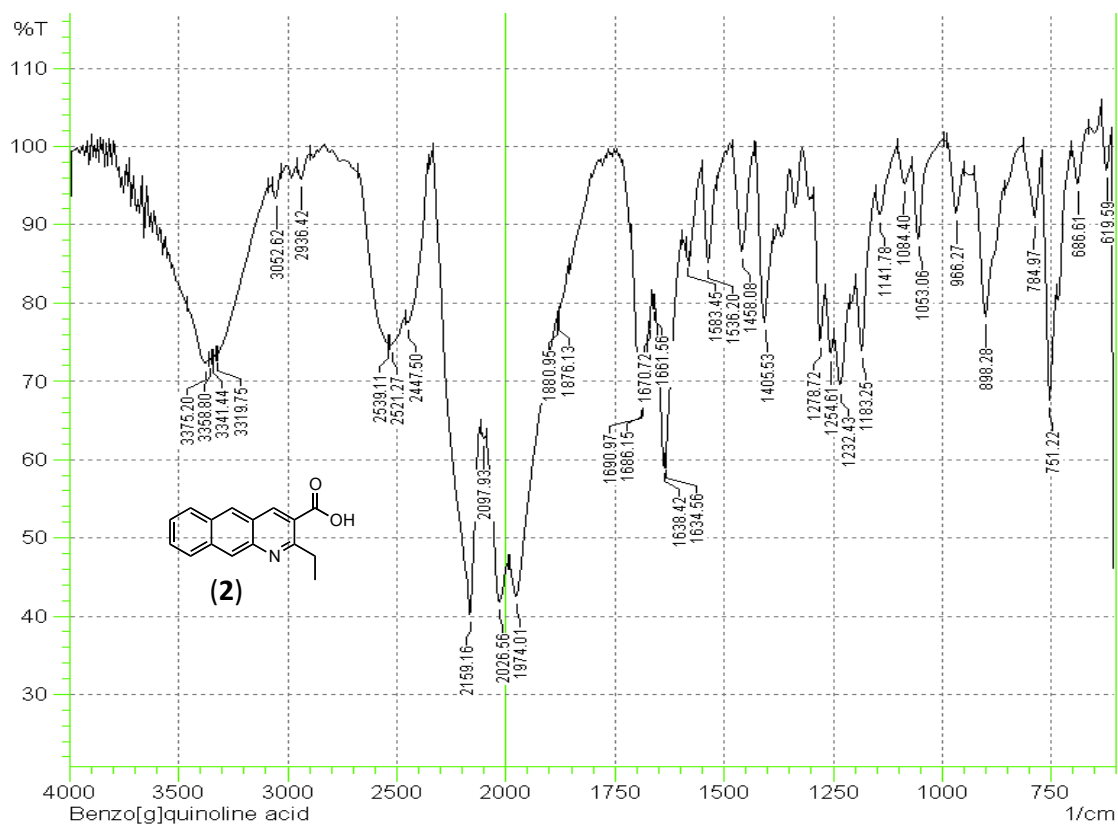

**SYNTHESIS, ISOLATION AND SPECTRAL CHARACTERIZATION OF  
COMPOUNDS 3, 4, 5, 6, 7, 8, 9, 10, AND 11.**

Compounds 3, 4 and 5: replacement of the disulfide in lead compound **1** with a non-labile olefin (C=C) bioisotere was performed according to procedures similar to those described in our recent report.<sup>5</sup> Briefly, resin bound monomer **3** (**Supplementary Scheme 2**) was synthesized using standard Fmoc methodology for solid phase peptide synthesis (SPPS). Wang resin (1.0 g, 100-200  $\mu$  mesh) was activated with 1,1'-carbonyldiimidazole (DIC, 3.3g, 10 mmol) in 12 mL of DMF for 12 h on a LabQuake rotator. The resin was then washed three times each with DMF, CH<sub>2</sub>Cl<sub>2</sub> and again with DMF, followed by reaction with 1,3-diaminopropane (0.72 mL, 10 mmol) in DMF for another 12 h. After repeating the was cycle, the first amino acid (Fmoc-lys(boc)-OH, 3 mmol) was coupled to the resin using HBTU (1.14 g, 3 mmol) and DIPEA (0.85 mL, 5 mmol) in 12 mL DMF and rotating the mixture for 2 h. Following the wash cycle, Fmoc deprotection was accomplished using 12 mL of 20 % piperidine in DMF for 1 hour, followed again by the wash cycle. The remaining amino acids (Fmoc-L-allylglycine and Fmoc-L-proline) were similarly coupled to the growing peptide on the resin. 2-ethyl benzo[g]quinoline carboxylic acid (**2**) (0.502 g, 2 mmol) was coupled to the rest of the peptide using same SPPS conditions to synthesize resin-bound monomeric compound **3**.

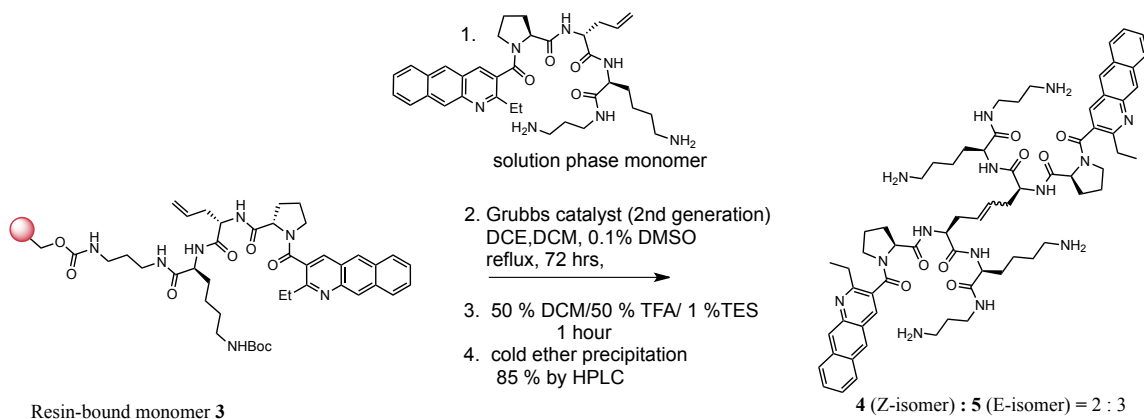

**Supplementary scheme 2.** Synthesis of compounds **4** and **5** using an olefin cross metathesis reaction.

Next, the resin was split into two equal parts of 0.50 g. One part was cleaved with 50 % TFA/1 % TES in 10 mL of CH<sub>2</sub>Cl<sub>2</sub> for 1 h to obtain **3** as a yellow solid material (0.20 g) after removal of solvent. This cleaved product was used without purification as the solution component for the metathesis reaction. Both resin-bound and cleaved **3** were dried under vacuum overnight. The resin was allowed to swell in 10 mL dry CH<sub>2</sub>Cl<sub>2</sub> for 10 min, washed (3 x 10 mL) with CH<sub>2</sub>Cl<sub>2</sub> and then subjected to three 10 min washes with 0.8 M LiCl in DMF. Finally, the resin was washed (2 x 10 mL) with dry, degassed 1,2-dichloroethane and suspended in 5 mL of the same solvent in a 25 mL two-neck round bottom flask equipped with a reflux condenser and an N<sub>2</sub> inlet. The cleaved monomer **3** (0.20 g, 0.32 mmol) dissolved in 10 mL of a 1:4 mixture of CH<sub>2</sub>Cl<sub>2</sub> and 1,2-dichloroethane (with two drops of DMSO to increase solubility) was added to the resin in the flask. The flask was maintained under a constant positive pressure of N<sub>2</sub> gas and a solution of Grubbs' second-generation metathesis catalyst (0.04 g, 0.05 mmol) dissolved in 1,2-dichloromethane (2 mL) was added. The reaction mixture was refluxed for 24 h, after which the catalyst was replenished with another 0.04 g portion and refluxed again for another 24 h. After repeating this cycle a second time, the reaction was cooled to room temperature and transferred into a standard solid-phase reaction vessel with filtering. The resin was washed with CH<sub>2</sub>Cl<sub>2</sub> (3 x 10 mL), methanol (1 x 15 mL), and DMF (3 x 10 mL) and then suspended in 10 mL of DMF with 0.2 mL DMSO and rotated for 12 hours. Finally, the resin was washed with CH<sub>2</sub>Cl<sub>2</sub> (3 x 10 mL) and subjected to a cleavage cocktail of 50 % TFA/50 % CH<sub>2</sub>Cl<sub>2</sub>/1 % TES for 1 h to obtain crude mixture **4** and **5** in a 3:2 isomer ratio. The isomers were separated using preparative reversed-phase-HPLC on a C18 column (Waters, XBridge™ Prep C18 5 μm OBD™, 19 X 250 mm) using a water-acetonitrile gradient with 0.1% TFA. While *E* and *Z* olefin geometries cannot be assigned definitively in the absent an X-ray crystal structure, we have proposed assignments based on three lines of evidence: chemical shifts of the olefin protons in the <sup>1</sup>H NMR spectra, analysis of the IR spectra, and the known selectivity of olefin cross-metathesis reactions. In <sup>1</sup>H NMR, the chemical shift of the olefin proton in the *E*-isomer is further downfield compared to the *Z*-isomer.<sup>6,7</sup> The infrared C=C stretch for the *E*-isomer shows absorbance at a higher frequency (1665 cm<sup>-1</sup>) compared to the *Z*-isomer C=C stretch (1662 cm<sup>-1</sup>). Also, the weak absorption at 971 cm<sup>-1</sup> for the *E*-isomer is

consistent with spectra for trans 1,2-disubstituted alkenes.<sup>8,9</sup> The 3:2 isomer ratio is not surprising, since although the trans isomer is thermodynamically more favored in olefin metathesis reactions, this often provides only modest selectivity.<sup>9</sup>

### HPLC trace for compound 3

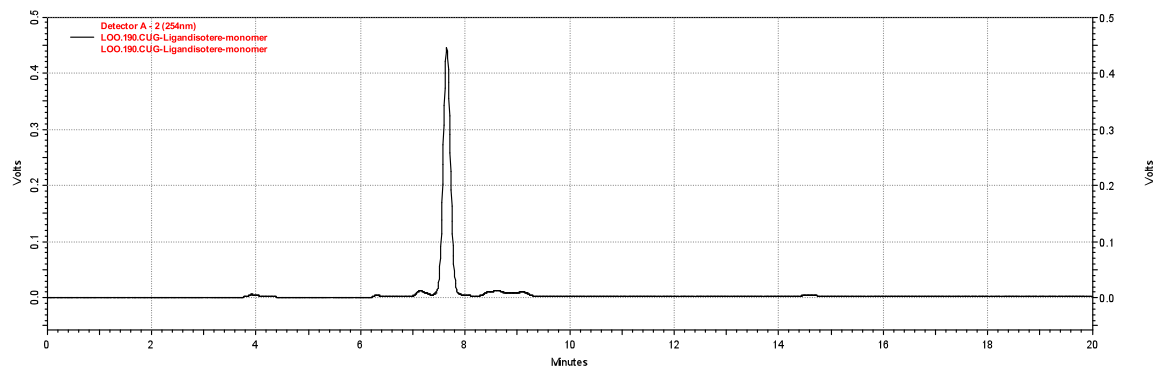

### HPLC trace for crude mixture of 4 and 5

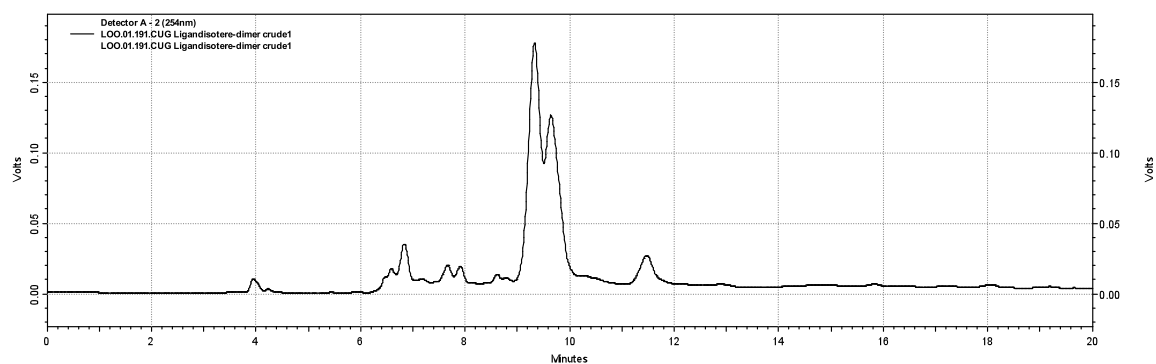

### HPLC trace for compound 4 (minor Z-isomer)

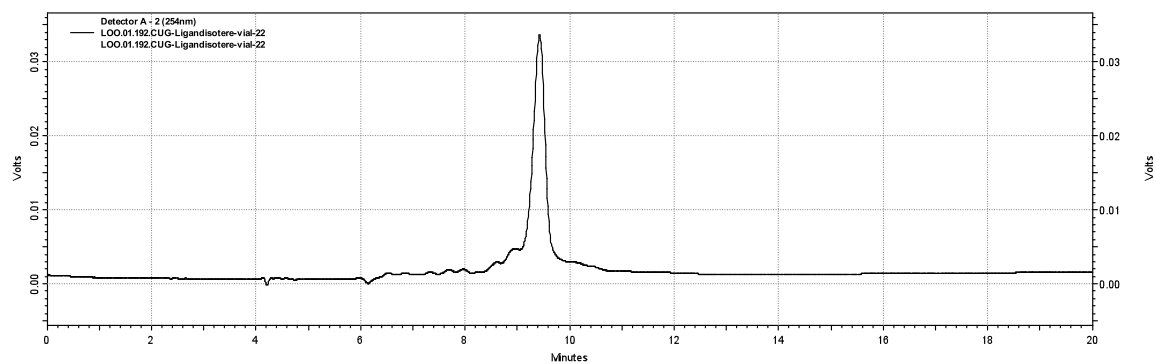

HPLC trace for compound **5** (major *E*-isomer)

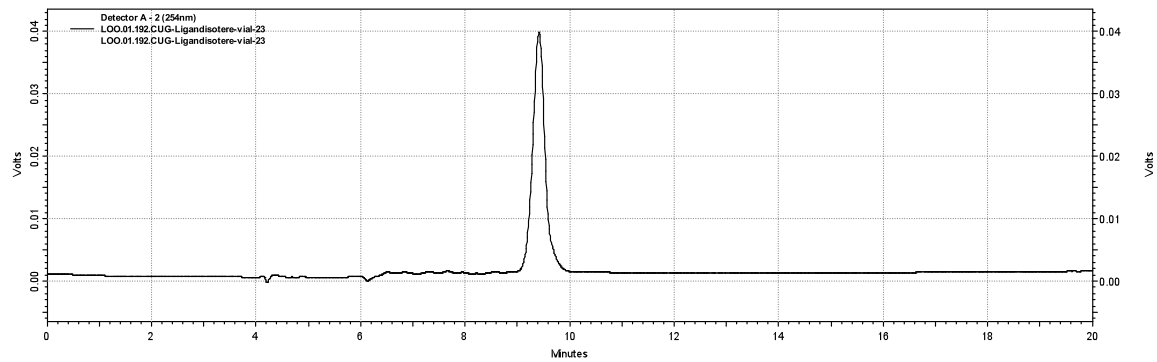



**NMR SPECTRA (<sup>1</sup>H and <sup>13</sup>C) FT-IR and HRMS OF COMPOUNDS 3, 4 and 5**

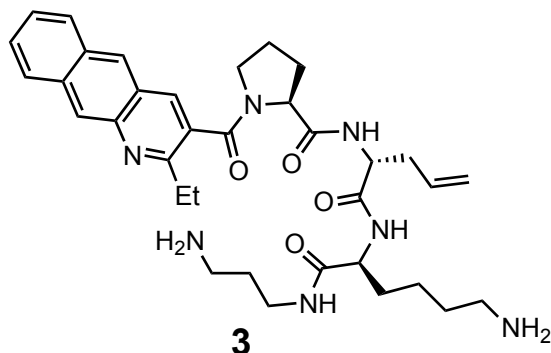

FT-IR (neat): 3654.37, 3117.23, 3080.59, 3041.53, 3016.94, 2944.13, 2934.01, 2532.36, 2520.79, 2488.97, 2449.43, 2159.16, 2097.93, 2027.05, 1974.01, 1904.09, 1875.16, 1854.43, 1660.6, 1654.81, 1646.61, 1638.42, 1631.67, 1628.77, 1581.52, 1518.84, 1430.12, 1405.05, 1194.82, 1176.5, 1126.35, 988.93, 924.32, 881.89, 833.67, 797.99, 748.8

<sup>1</sup>H NMR (400 MHz, CD<sub>3</sub>OD)  $\delta$ : 9.24 (s, 1H), 8.89 (s, 1H), 8.76 (s, 2H), 8.22 (d, J = 4.8 Hz, 3H), 7.75 (dt, J = 14.3, 6.6 Hz, 3H), 5.91 (dq, J = 10.1, 6.8 Hz, 1H), 5.16 (dd, J = 36.1, 13.8 Hz, 3H), 4.73 (dd, J = 7.9, 5.3 Hz, 2H), 4.41 (dd, J = 15.6, 10.3 Hz, 2H), 4.26 (dd, J = 8.7, 5.2 Hz, 1H), 4.21 – 4.12 (m, 1H), 3.97 (d, J = 8.5 Hz, 1H), 3.84 (s, 2H), 3.60 (dd, J = 10.8, 6.6 Hz, 2H), 3.01 – 2.80 (m, 7H), 2.71 – 2.50 (m, 2H), 2.42 (dd, J = 12.2, 7.5 Hz, 2H), 2.20 – 1.92 (m, 6H), 1.90 – 1.55 (m, 12H), 1.55 – 1.30 (m, 9H).

<sup>13</sup>C NMR (126 MHz, CD<sub>3</sub>OD)  $\delta$ : 174.48, 173.74, 173.45, 163.74, 137.06, 134.38, 134.00, 133.26, 130.71, 130.05, 129.97, 129.65, 129.59, 129.03, 124.90, 124.61, 118.34, 117.66, 62.88, 61.53, 54.70, 54.49, 54.36, 51.00, 40.17, 40.08, 40.05, 37.92, 37.83, 37.75, 36.62, 36.53, 35.94, 32.88, 31.99, 31.92, 30.85, 28.29, 28.24, 27.70, 27.65, 27.61, 25.75, 23.75, 23.50, 23.41, 13.76, 13.68, 13.62.

HRMS *m/z* calculated for C<sub>35</sub>H<sub>48</sub>N<sub>7</sub>O<sub>4</sub> [M+H]<sup>+</sup>: 630.3762, found: 630.3760

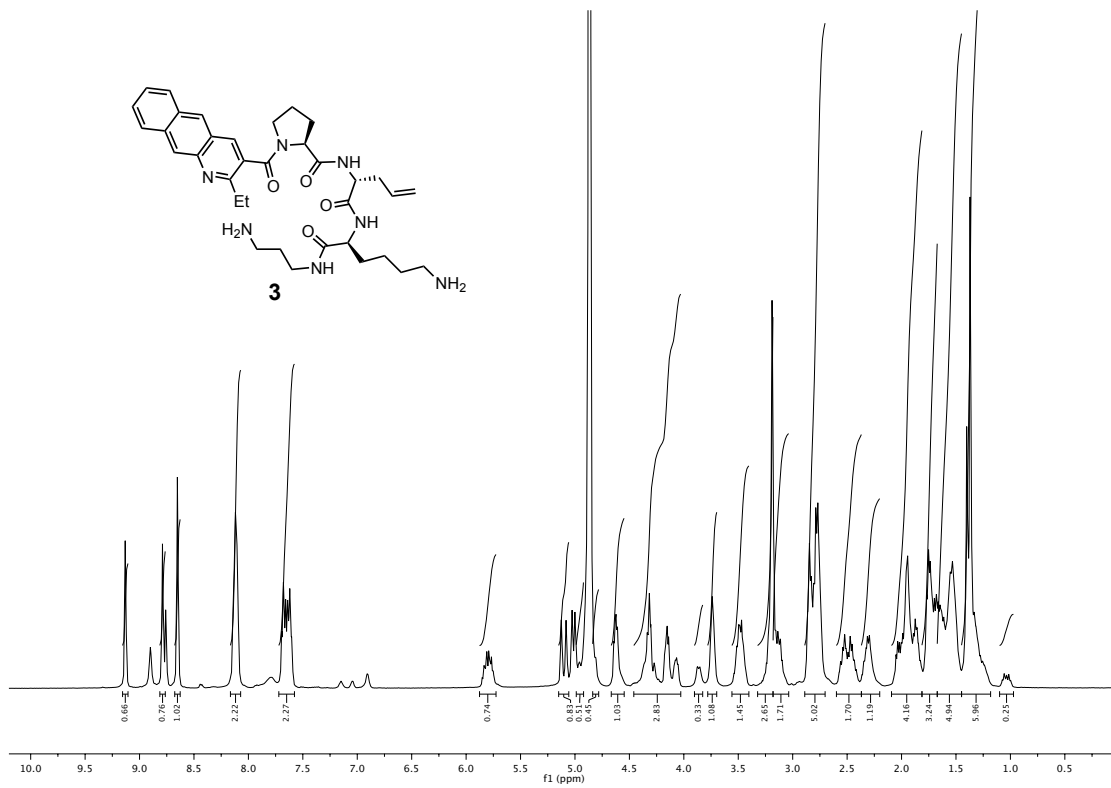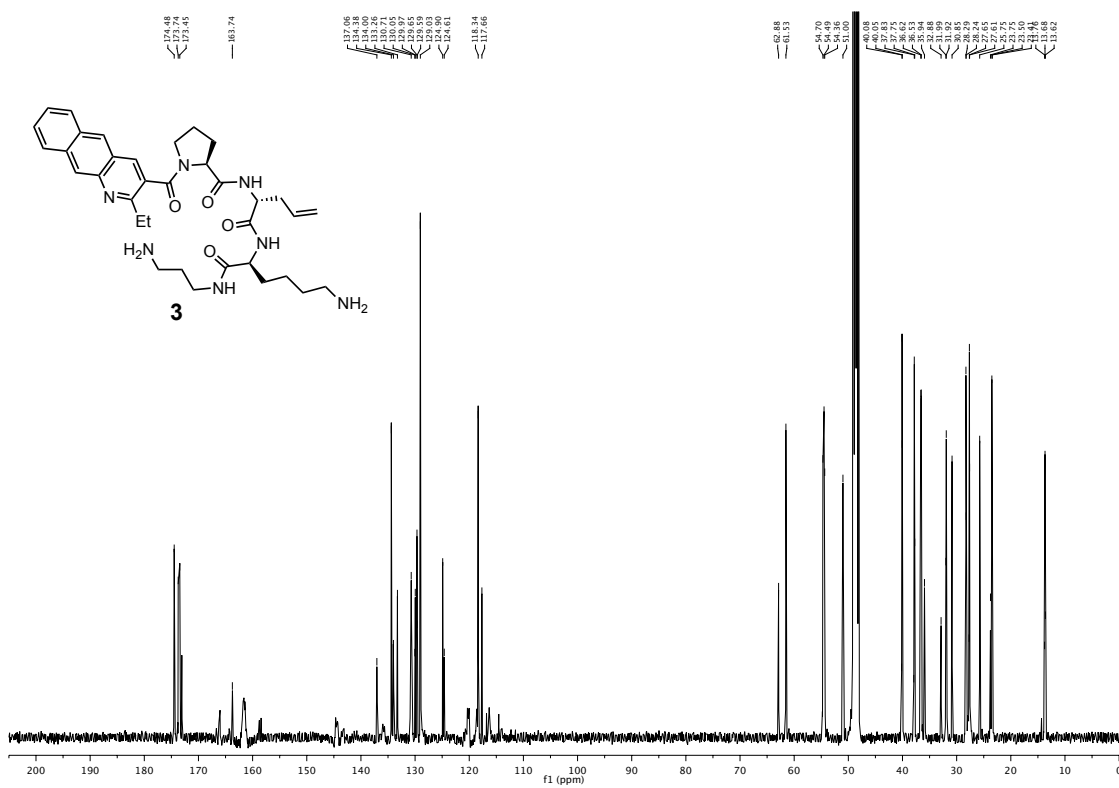

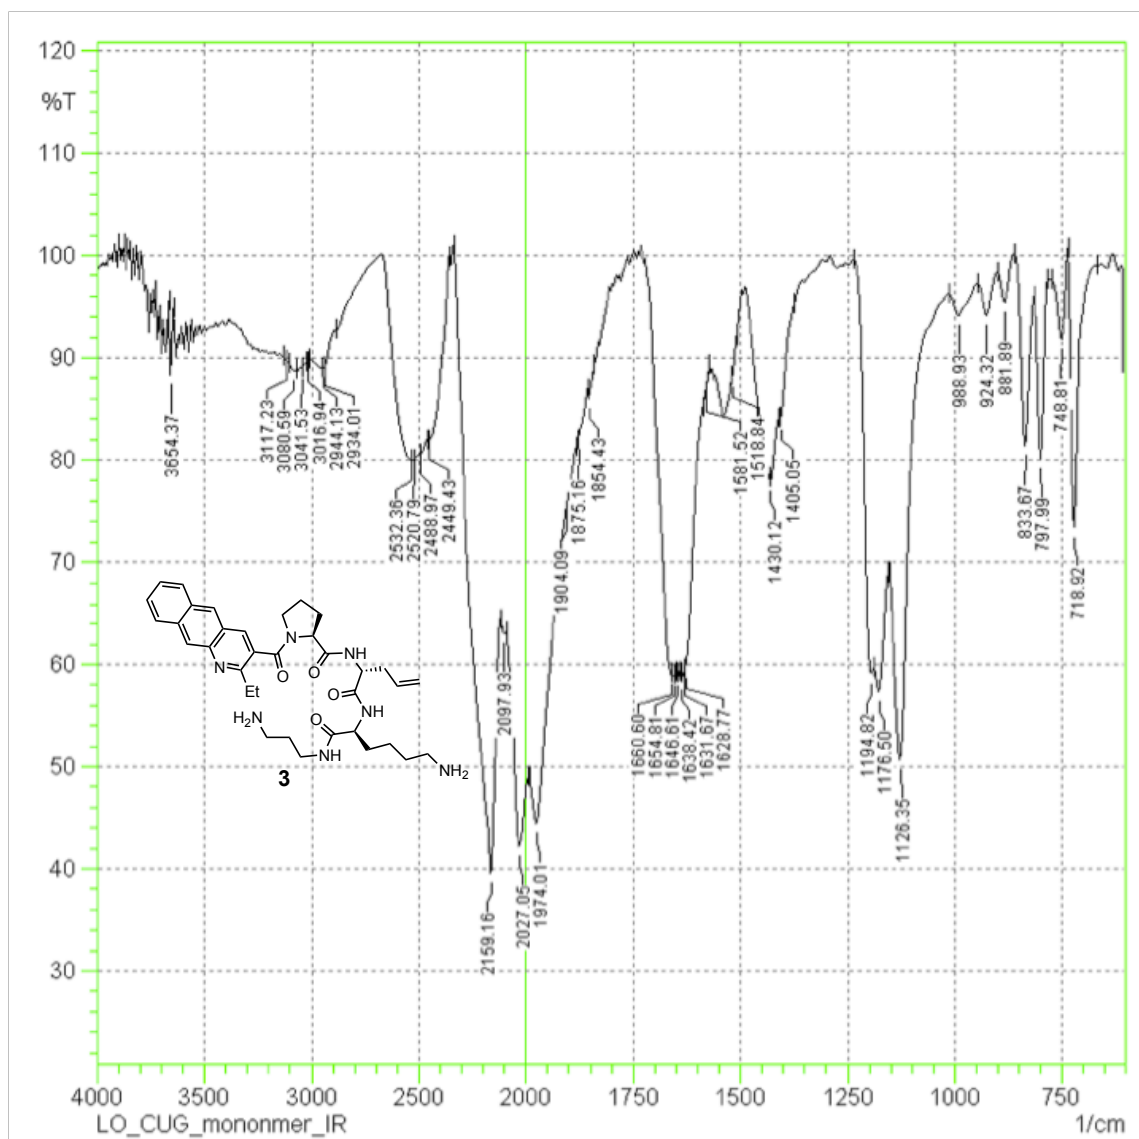

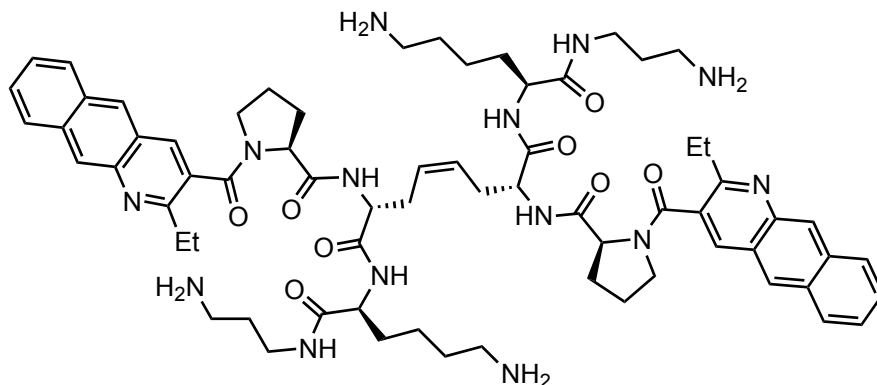**4**

FT-IR (neat): 3461.02, 3284.07, 3271.53, 3059.86, 3056.96, 2947.99, 2671.71, 2560.33, 1662.04, 1649.99, 1645.17, 1535.71, 1532.34, 1433.98, 1433.98, 1181.8, 1127.8, 1061.74, 968.68, 880.93, 836.08, 798.96, 751.7, 719.4

$^1\text{H}$  NMR (500 MHz,  $\text{D}_2\text{O}$ )  $\delta$ : 8.50 (s, 1H), 7.71 (s, 1H), 7.41 (s, 1H), 7.16 (s, 2H), 6.97 (dd,  $J = 20.3, 17.0$  Hz, 2H), 5.66 – 5.50 (m, 2H), 5.23 (d,  $J = 11.1$  Hz, 1H), 5.15 (s, 1H), 5.13 (s, 1H), 4.58 – 4.45 (m, 2H), 4.31 – 4.14 (m, 2H), 3.43 (s, 1H), 3.29 (dt,  $J = 12.5, 5.9$  Hz, 4H), 3.17 – 3.03 (m, 2H), 2.97 (dt,  $J = 19.3, 9.3$  Hz, 10H), 2.54 (d,  $J = 14.9$  Hz, 2H), 2.41 (s, 2H), 2.04 – 1.57 (m, 20H), 1.43 (t,  $J = 7.6$  Hz, 10H), 1.21 (t,  $J = 7.7$  Hz, 2H), 1.02 – 0.98 (m, 1H).

$^{13}\text{C}$  NMR (126 MHz,  $\text{D}_2\text{O}$ )  $\delta$ : 173.78, 173.73, 173.39, 173.19, 172.64, 172.50, 164.32, 163.79, 162.18, 159.98, 153.50, 144.50, 140.51, 139.93, 138.42, 137.12, 133.87, 132.70, 130.72, 129.08, 128.86, 128.71, 128.38, 128.27, 127.96, 127.75, 127.40, 127.10, 121.79, 116.30, 60.40, 60.22, 53.94, 53.75, 53.49, 53.18, 50.45, 49.85, 49.12, 48.63, 39.14, 39.10, 37.06, 37.01, 36.24, 36.16, 34.12, 30.66, 30.40, 29.92, 28.63, 26.64, 26.60, 26.38, 26.32, 26.26, 24.79, 24.65, 24.47, 22.13, 14.40, 13.43.

HRMS  $m/z$  calculated for  $\text{C}_{68}\text{H}_{91}\text{N}_{14}\text{O}_8$   $[\text{M}+\text{H}]^+$ : 1231.7139; found: 1231.7155.

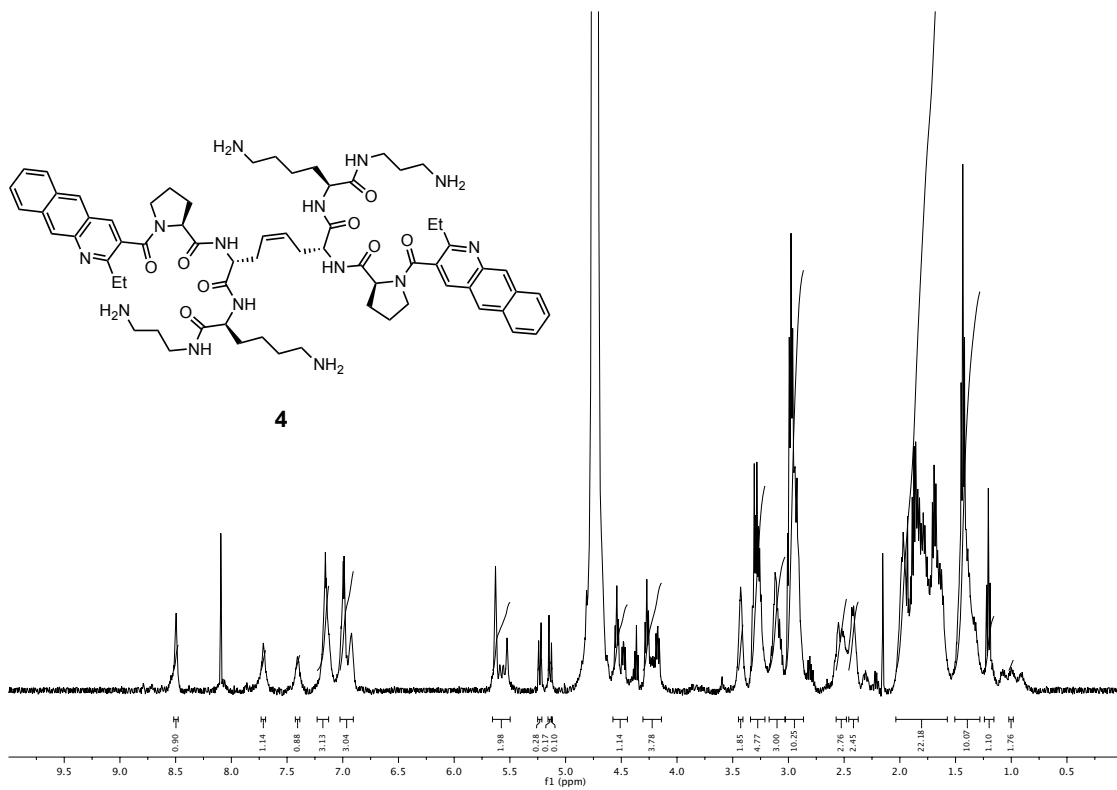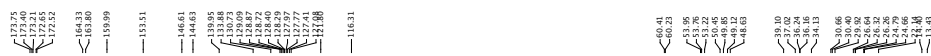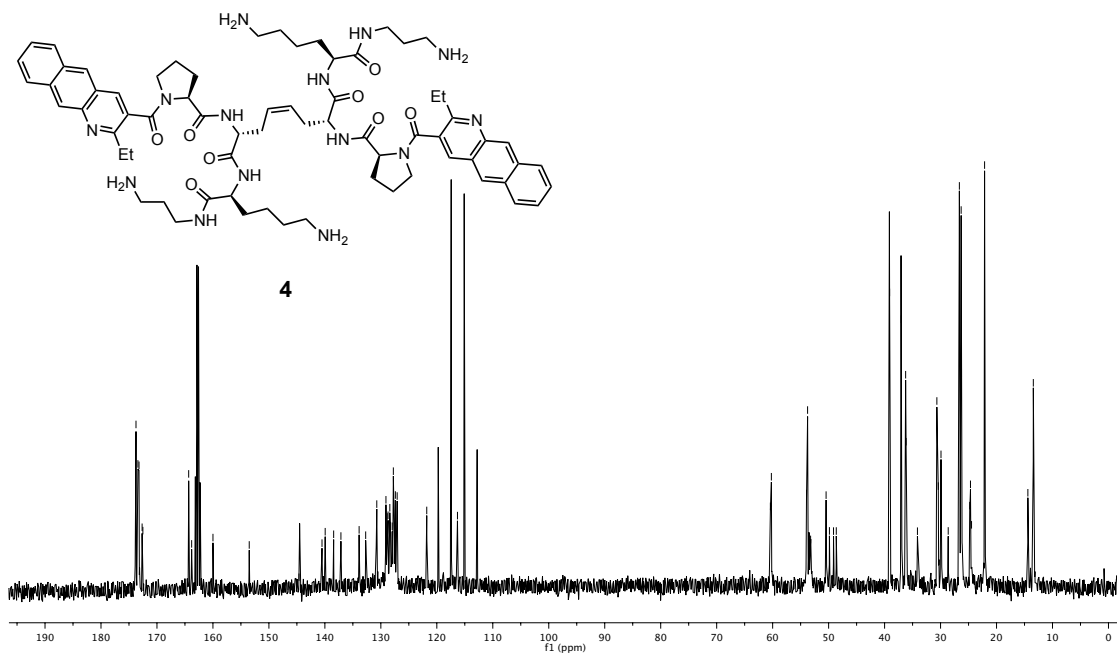

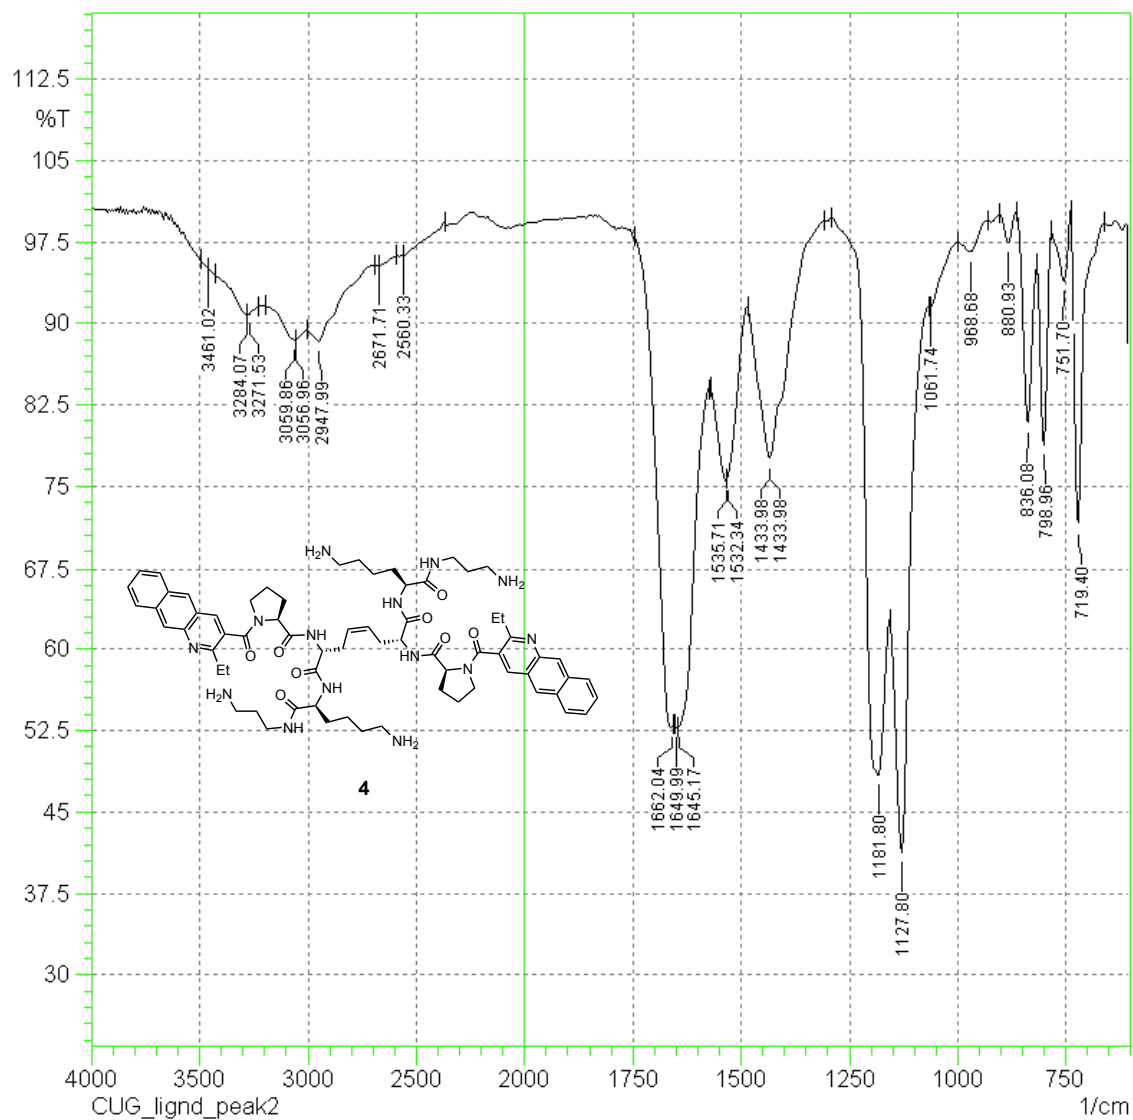

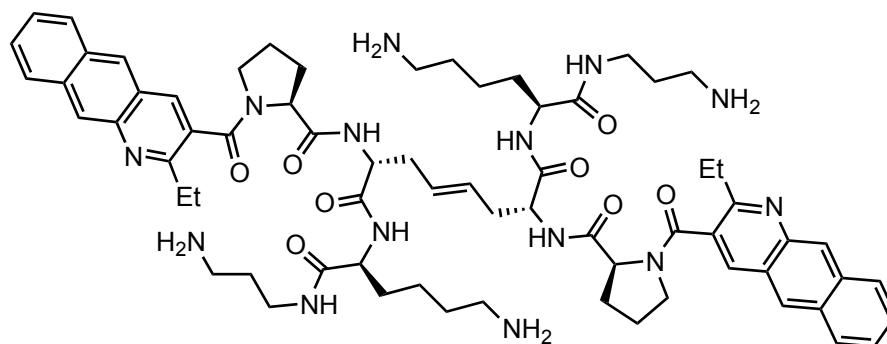**5**

FT-IR (neat): 3285.03, 3271.53, 3054.55, 3048.77, 2945.58, 2675.08, 2557.43, 1665.42, 1648.54, 1533.79, 1431.57, 1193.85, 1179.39, 1127.32, 1062.22, 972.06, 881.41, 834.64, 798.47, 753.63, 719.4

$^1\text{H}$  NMR (500 MHz,  $\text{D}_2\text{O}$ )  $\delta$ : 8.56 (s, 1H), 7.74 (s, 1H), 7.36 (s, 1H), 7.19 – 7.12 (m, 3H), 7.11 – 7.07 (m, 1H), 7.02 – 6.94 (m, 3H), 6.94 – 6.90 (m, 1H), 5.67 (t,  $J = 4.4$  Hz, 1H), 5.55 (s, 1H), 5.24 (d,  $J = 10.9$  Hz, 1H), 5.14 (d,  $J = 10.9$  Hz, 1H), 4.64 – 4.55 (m, 1H), 4.52 – 4.39 (m, 1H), 4.27 – 4.20 (m, 2H), 4.18 (d,  $J = 6.1$  Hz, 1H), 4.11 (s, 1H), 3.43 (s, 2H), 3.29 (d,  $J = 9.1$  Hz, 9H), 3.11 (s, 2H), 2.97 (dt,  $J = 23.5, 8.0$  Hz, 19H), 2.69 (s, 2H), 2.62 (s, 2H), 2.41 (s, 2H), 2.01 – 1.91 (m, 8H), 1.90 – 1.74 (m, 17H), 1.74 – 1.61 (m, 13H), 1.41 (dd,  $J = 16.6, 8.8$  Hz, 18H), 1.22 (t,  $J = 7.8$  Hz, 2H).

$^{13}\text{C}$  NMR (126 MHz,  $\text{D}_2\text{O}$ )  $\delta$ : 173.86, 173.76, 173.35, 173.22, 173.14, 164.44, 164.39, 161.86, 160.13, 145.01, 144.50, 140.01, 139.76, 138.60, 137.31, 133.72, 132.55, 130.70, 129.01, 128.61, 128.20, 127.92, 127.72, 127.14, 127.07, 121.90, 116.29, 60.46, 60.25, 53.98, 53.03, 50.35, 48.67, 39.14, 37.06, 36.17, 30.63, 29.93, 26.65, 26.34, 24.68, 22.17, 14.24, 13.37.

HRMS  $m/z$  calculated for  $\text{C}_{68}\text{H}_{91}\text{N}_{14}\text{O}_8$   $[\text{M}+\text{H}]^+$ : 1231.7139; found: 1231.7156.

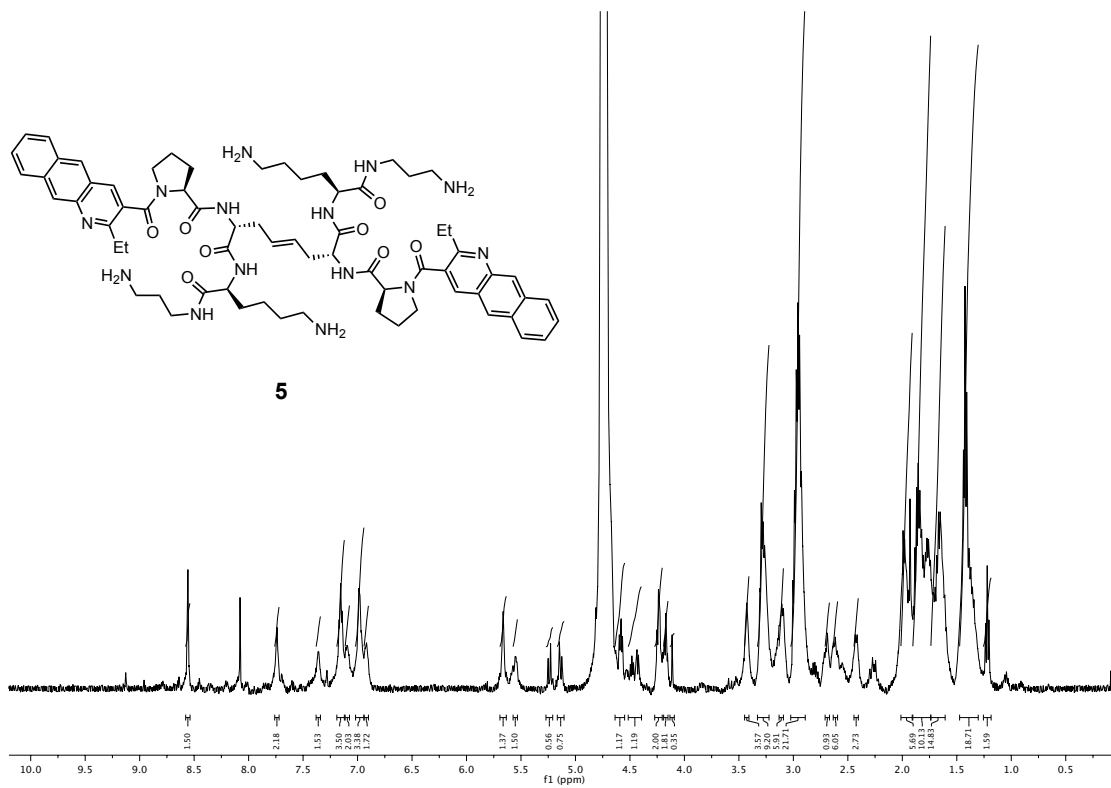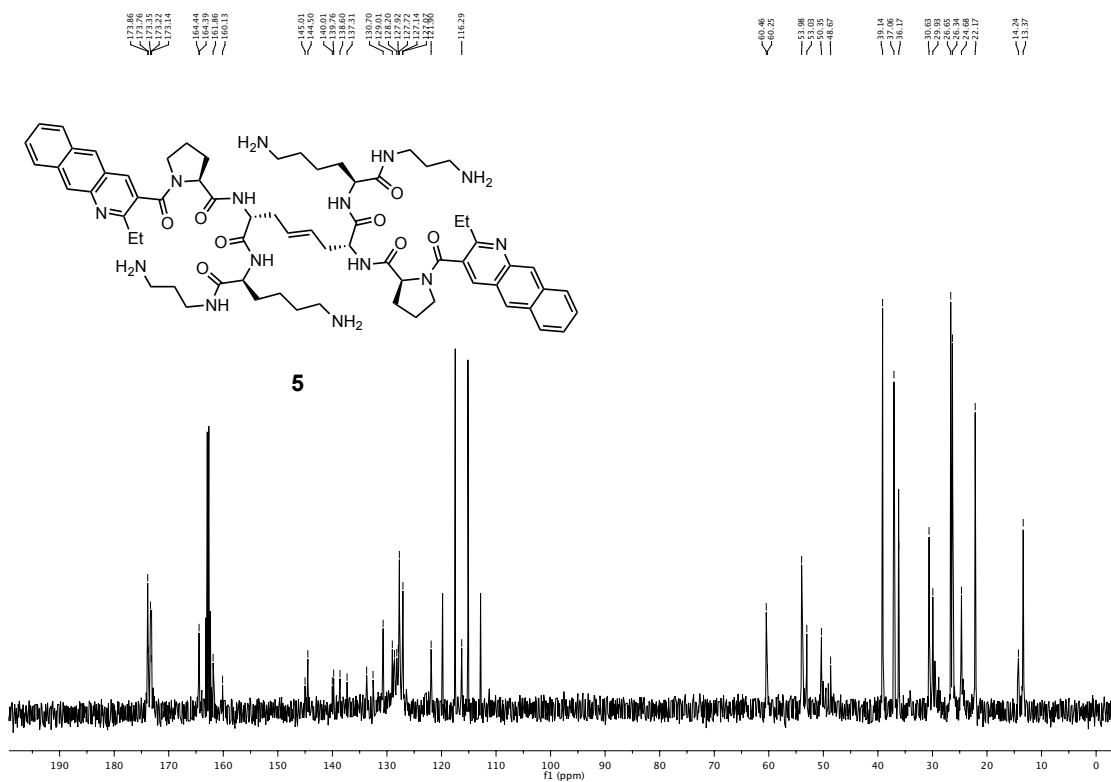



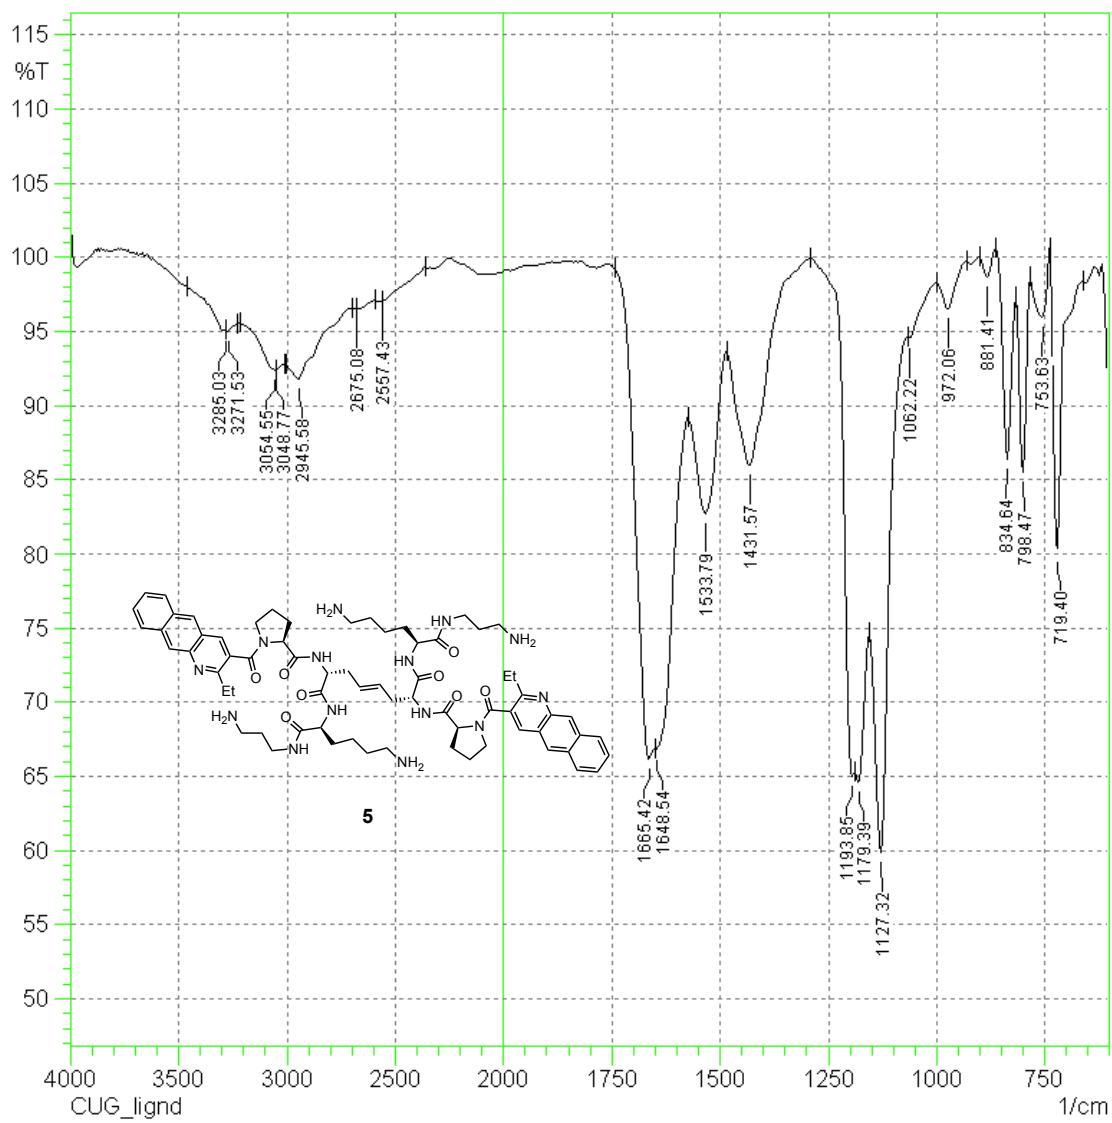

Compounds 6 and 7 were synthesized using the SPPS procedure described above to assemble the resin-bound monomer shown in **Supplementary Scheme 3**. However, the ethyl benzo[g]quinoline carboxylic acid heterocycle coupling step was eliminated. The resin-bound Fmoc protected monomer was then subjected to the olefin metathesis reaction in the presence of the Fmoc-monomer solution component as describe above. After the reaction was completed, the Fmoc group was removed with 20% piperidine in DMF before the peptidic product was cleaved from the resin with 50% TFA/50% CH<sub>2</sub>Cl<sub>2</sub>. The solvent was removed and the product was precipitate twice from cold diethyl ether. The crude mixture of **6** and **7** was purified and separated by reverse-phase preparative HPLC to obtain **6** and **7** in a *Z:E* geometrical isomer ratio of 1:2. The products were confirmed by mass spectrometry and olefin geometries were assigned as described above.

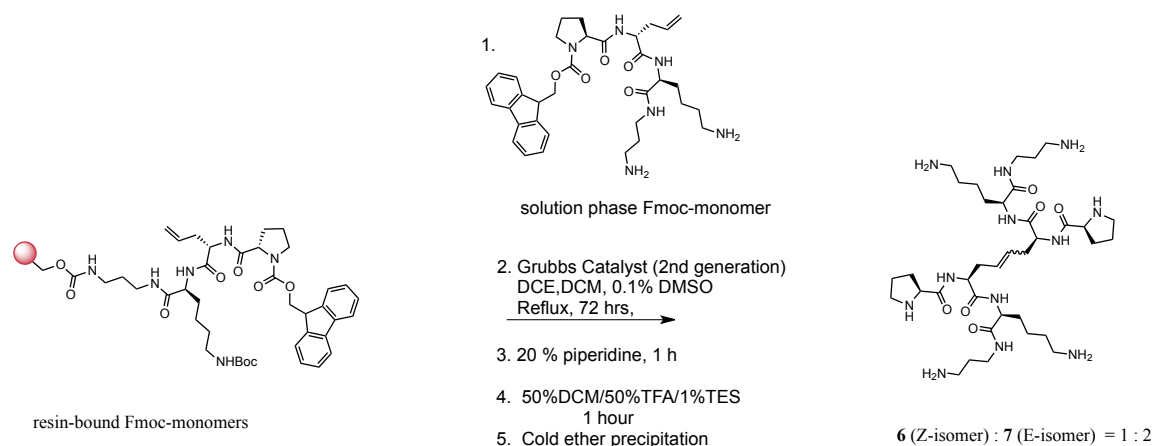

**Supplementary Scheme 3:** synthesis of analogs of lead compound lacking the benzo[g]quinoline heterocycle (**6** and **7**) by olefin metathesis.

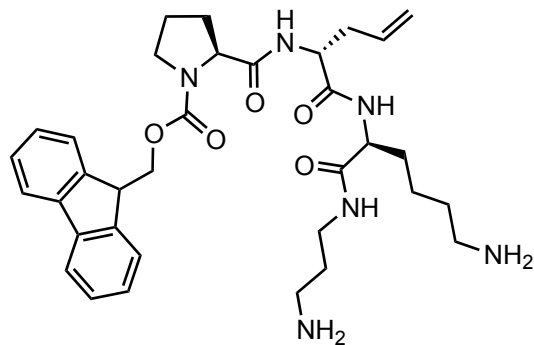

## Fmoc-monomer

FT-IR (neat): 3672.21, 3076.73, 2959.56, 2877.6, 2487.04, 2443.64, 2159.16, 2098.41, 2026.08, 1975.45, 1788.37, 1659.15, 1648.54, 1533.79, 1425.3, 1352.97, 1174.09, 1129.73, 986.52, 924.8, 835.6, 797.99, 762.31, 740.13, 718.92

$^1\text{H}$  NMR (400 MHz,  $\text{CD}_3\text{OD}$ )  $\delta$ : 7.49 (d,  $J = 7.4$  Hz, 1H), 7.36 – 7.24 (m, 1H), 7.06 (dt,  $J = 29.8, 7.3$  Hz, 2H), 5.48 (qd,  $J = 16.4, 8.4$  Hz, 1H), 4.83 – 4.71 (m, 1H), 4.64 (d,  $J = 10.0$  Hz, 1H), 4.22 – 3.79 (m, 3H), 3.37 – 3.07 (m, 1H), 3.07 – 2.87 (m, 1H), 2.60 (dd,  $J = 30.9, 6.6$  Hz, 2H), 2.22 (tdd,  $J = 20.6, 14.2, 7.6$  Hz, 1H), 2.06 – 1.85 (m, 1H), 1.73 – 1.50 (m, 3H), 1.50 – 1.41 (m, 1H), 1.32 (d,  $J = 6.6$  Hz, 1H), 1.12 (d,  $J = 6.8$  Hz, 1H).

$^{13}\text{C}$  NMR (126 MHz,  $\text{CD}_3\text{OD}$ )  $\delta$ : 175.63, 174.84, 174.02, 157.35, 156.59, 145.49, 145.30, 145.07, 144.91, 142.64, 142.58, 134.83, 134.52, 128.94, 128.25, 126.17, 121.05, 69.01, 62.49, 61.28, 55.22, 54.97, 40.40, 38.14, 36.94, 36.14, 32.68, 32.34, 31.89, 31.34, 28.48, 27.86, 25.47, 23.86.

HRMS  $m/z$  calculated for  $\text{C}_{34}\text{H}_{47}\text{N}_6\text{O}_5$   $[\text{M}+\text{H}]^+$ : 619.3602: found: 619.3603.

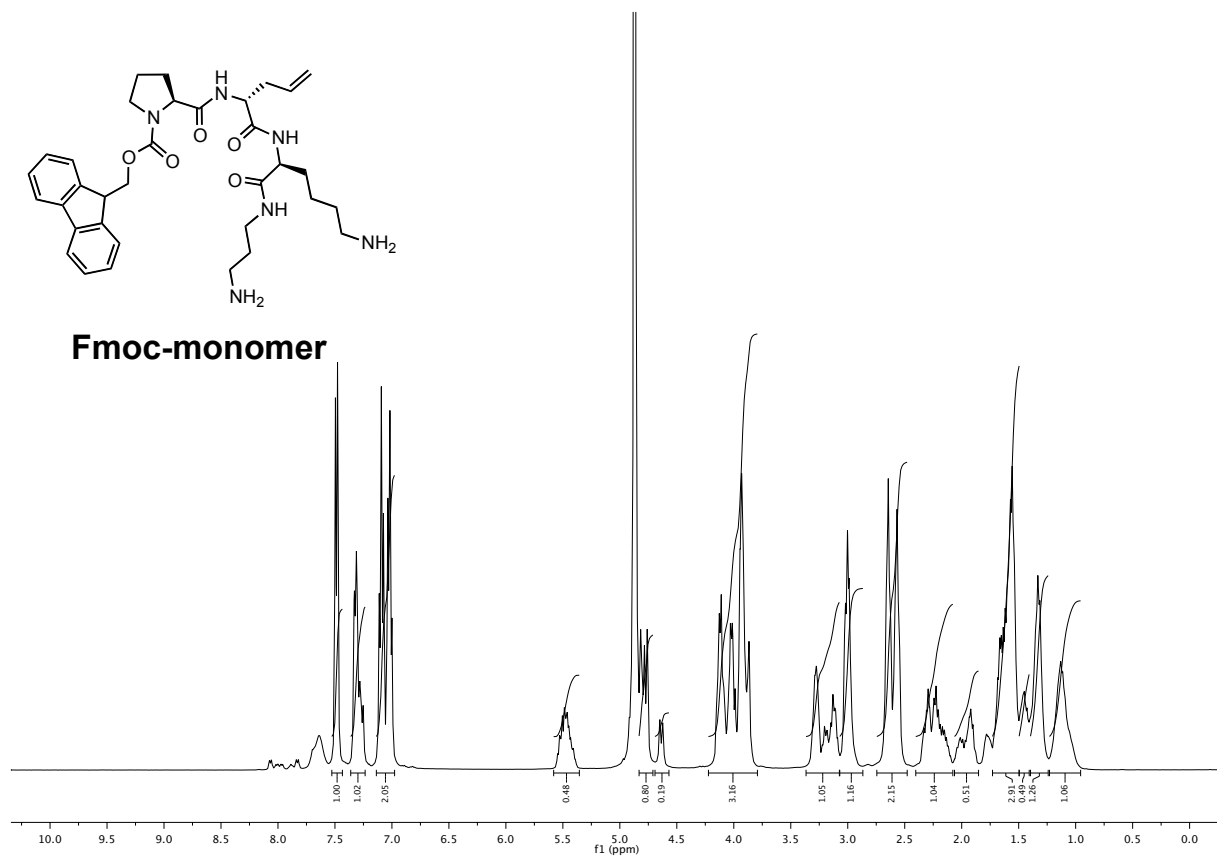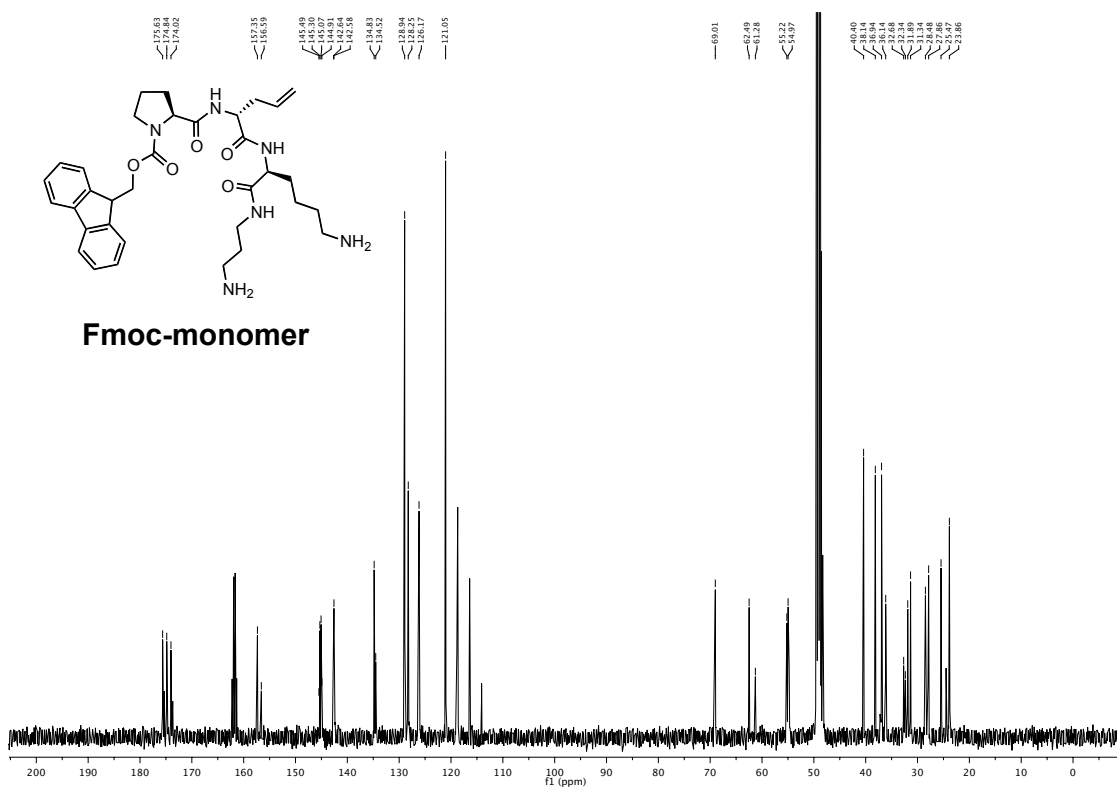

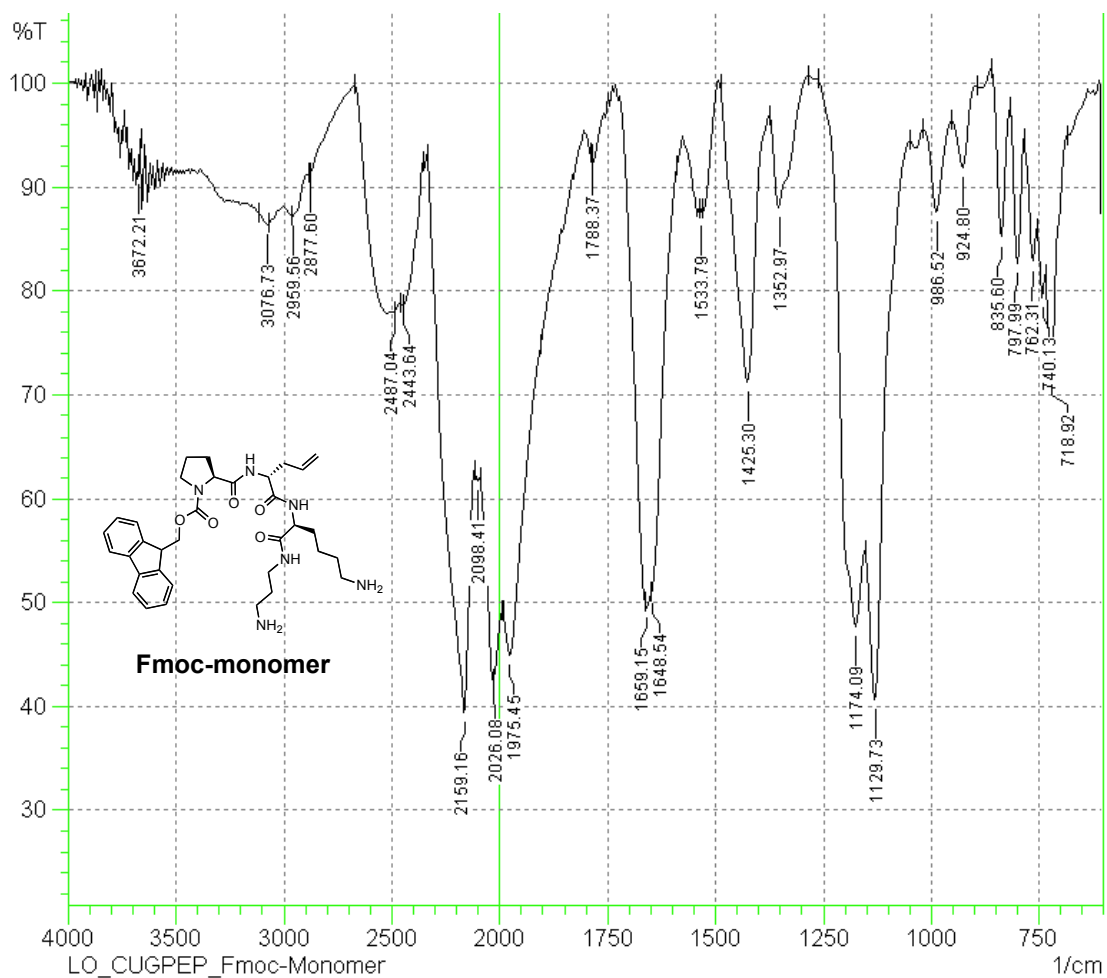

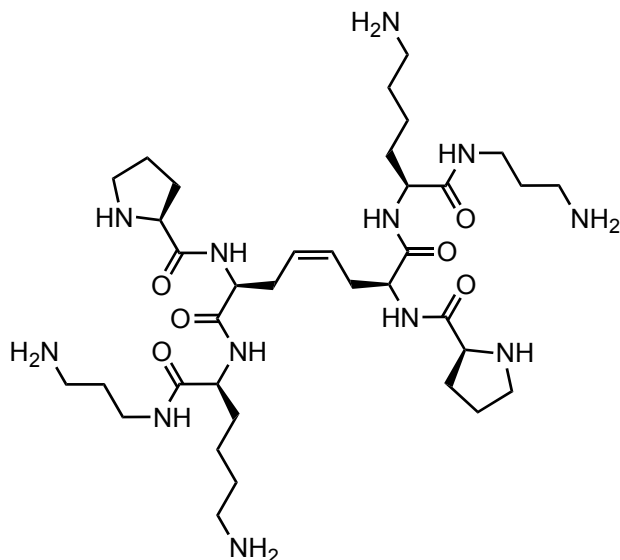

**6**

FTIR (neat): 3652.93, 3549.26, 3271.53, 3237.78, 3196.31, 3083, 3079.14, 3018.39, 2952.33, 2934.01, 2538.15, 2528.02, 2447.5, 2159.16, 2098.89, 2025.6, 1975.45, 1902.16, 1873.72, 1780.17, 1664.45, 1659.63, 1636.97, 1601.29, 1542.46, 1519.32, 1435.42, 1132.62, 969.16, 838.01, 797.99, 718.92

$^1\text{H}$  NMR (400 MHz,  $\text{D}_2\text{O}$ )  $\delta$ : 5.44 (t,  $J = 3.3$  Hz, 2H), 4.46 (t,  $J = 7.6$  Hz, 1H), 4.40 – 4.03 (m, 9H), 3.45 (q,  $J = 7.1$  Hz, 1H), 3.39 – 3.26 (m, 7H), 3.19 (t,  $J = 6.8$  Hz, 7H), 2.89 (dd,  $J = 14.6, 7.1$  Hz, 16H), 2.43 – 2.27 (m, 6H), 1.94 (dd,  $J = 14.5, 7.4$  Hz, 10H), 1.83 – 1.72 (m, 8H), 1.72 – 1.54 (m, 16H), 1.43 – 1.16 (m, 5H).

$^{13}\text{C}$  NMR (126 MHz,  $\text{CD}_3\text{OD}$ )  $\delta$ : 174.80, 173.16, 169.98, 129.80, 80.01, 60.98, 54.85, 54.76, 47.53, 40.41, 38.26, 37.09, 35.78, 32.64, 31.17, 28.64, 28.09, 25.03, 23.85.

HRMS  $m/z$  calculated for  $\text{C}_{36}\text{H}_{69}\text{N}_{12}\text{O}_6$   $[\text{M}+\text{H}]^+$ : 765.5458: found: 765.5473.

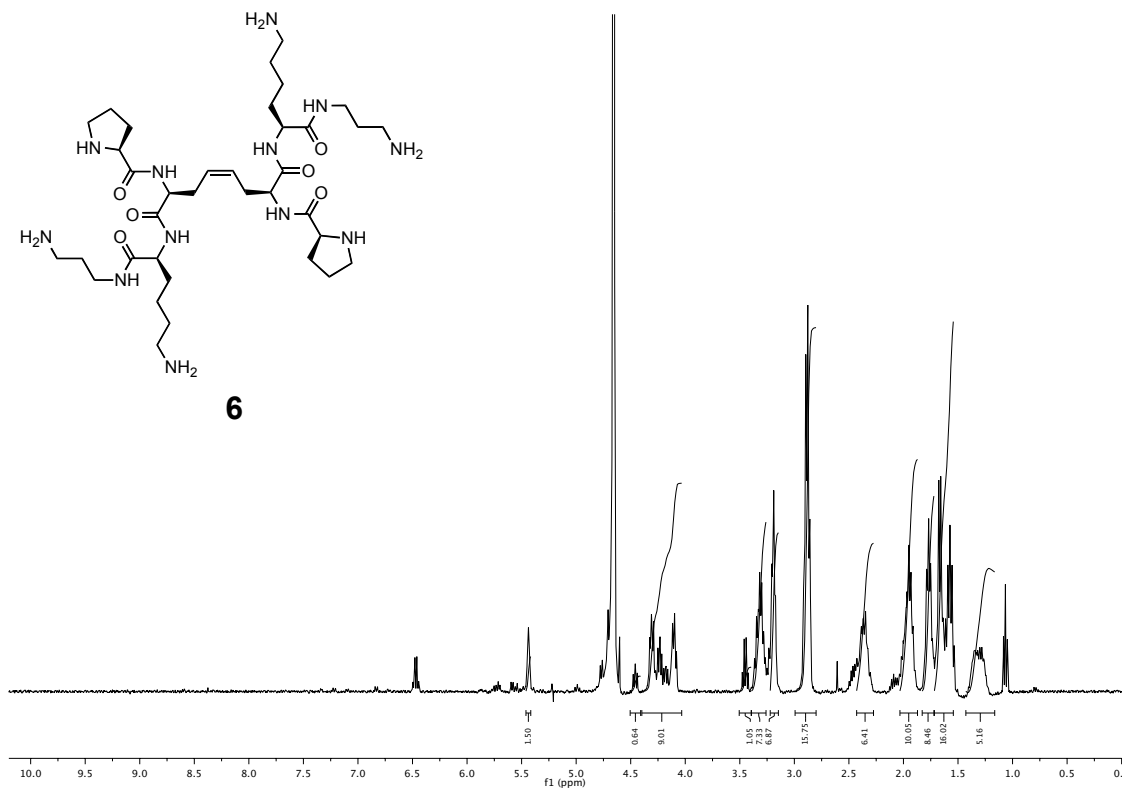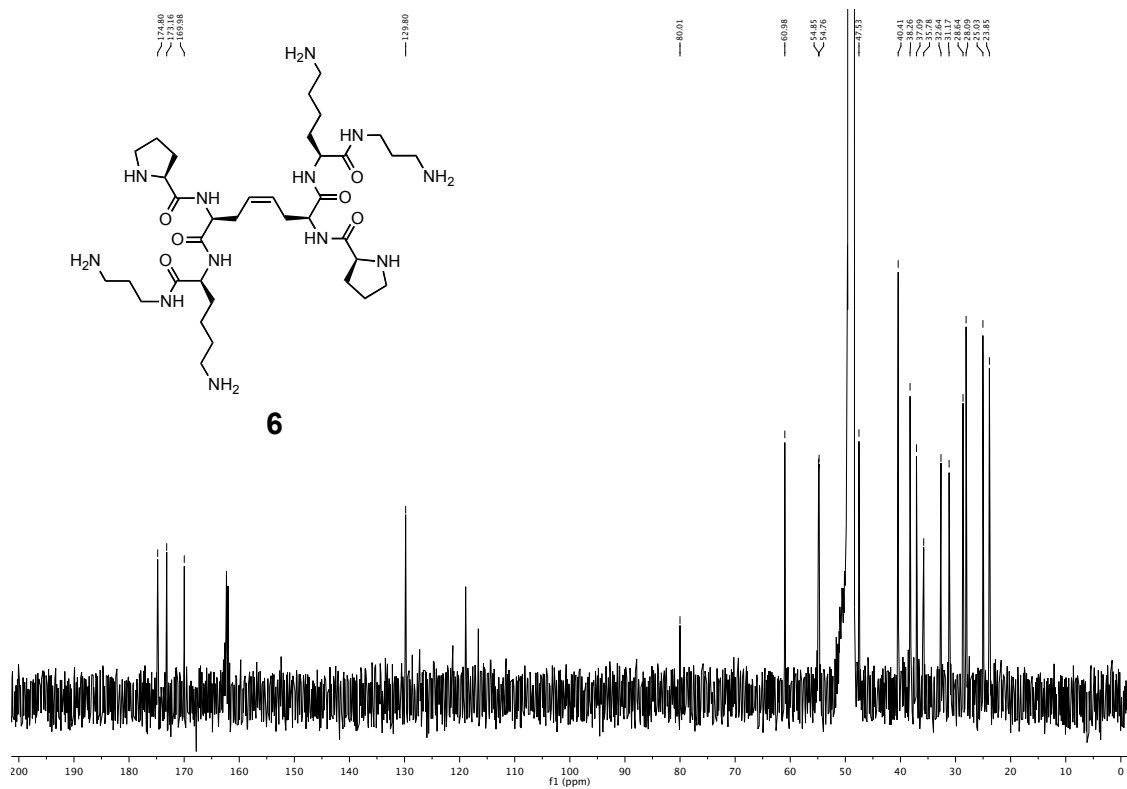

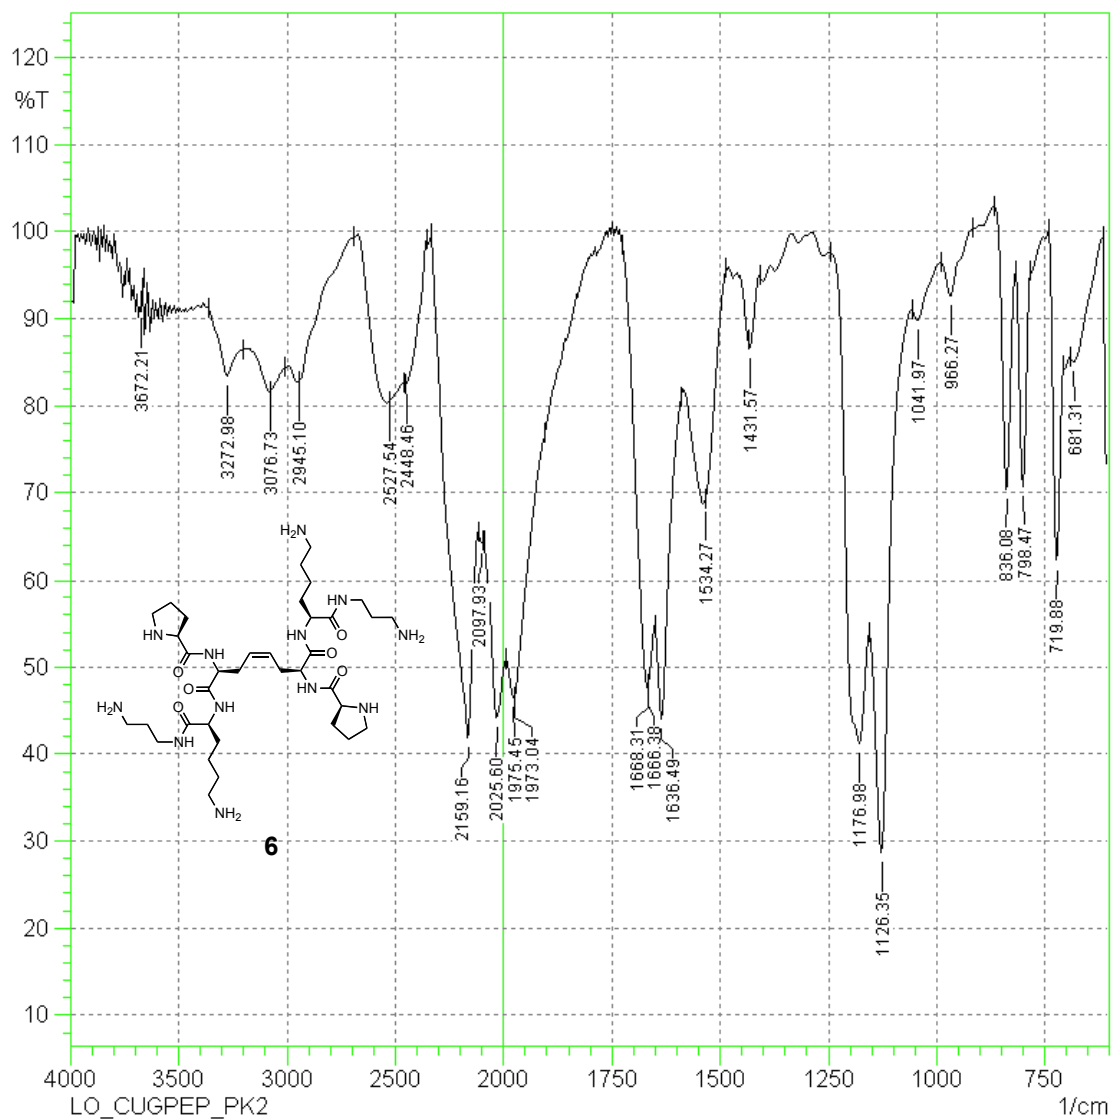



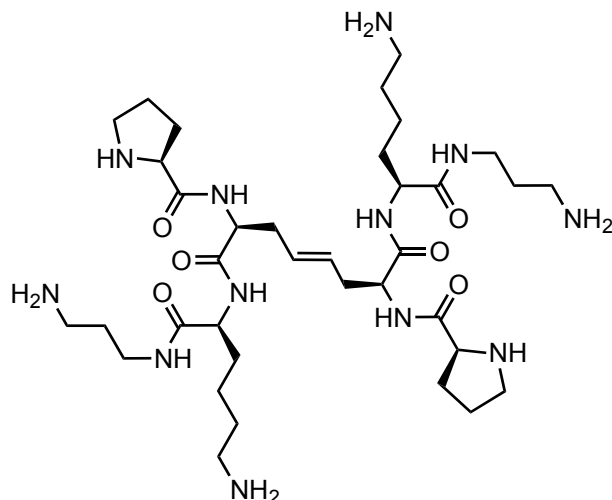

**7**

FT-IR (neat): 3672.21, 3272.98, 3076.73, 2945.1, 2527.54, 2448.46, 2159.16, 2097.93, 2025.6, 1975.45, 1973.04, 1668.31, 1666.38, 1636.49, 1534.27, 1431.57, 1176.98, 1126.35, 1041.97, 966.27, 836.08, 798.47, 719.88, 681.31

$^1\text{H}$  NMR (400 MHz,  $\text{D}_2\text{O}$ )  $\delta$ : 5.45 (t,  $J = 3.8$  Hz, 2H), 4.83 – 4.73 (m, 1H), 4.38 – 4.23 (m, 5H), 4.23 – 4.06 (m, 4H), 3.42 – 3.13 (m, 13H), 2.89 (q,  $J = 7.6$  Hz, 13H), 2.61 – 2.17 (m, 8H), 2.09 – 1.80 (m, 10H), 1.80 – 1.47 (m, 19H), 1.32 (ddd,  $J = 23.3, 14.4, 7.2$  Hz, 6H).

$^{13}\text{C}$  NMR (126 MHz,  $\text{CD}_3\text{OD}$ )  $\delta$ : 174.83, 173.15, 169.97, 129.79, 128.61, 60.99, 54.84, 54.75, 47.52, 45.70, 40.41, 38.26, 37.08, 35.75, 32.63, 31.18, 28.63, 28.58, 28.06, 25.04, 23.83, 23.74.

HRMS  $m/z$  calculated for  $\text{C}_{36}\text{H}_{69}\text{N}_{12}\text{O}_6$   $[\text{M}+\text{H}]^+$ : 765.5458: found: 765.5431

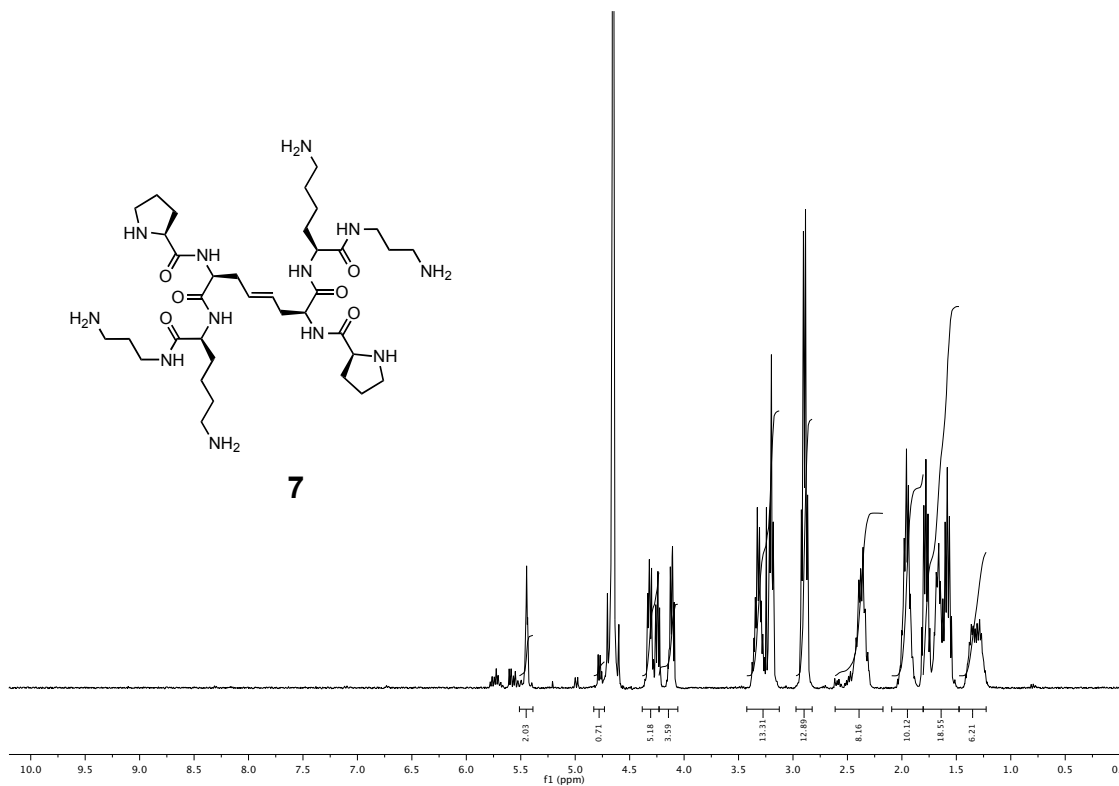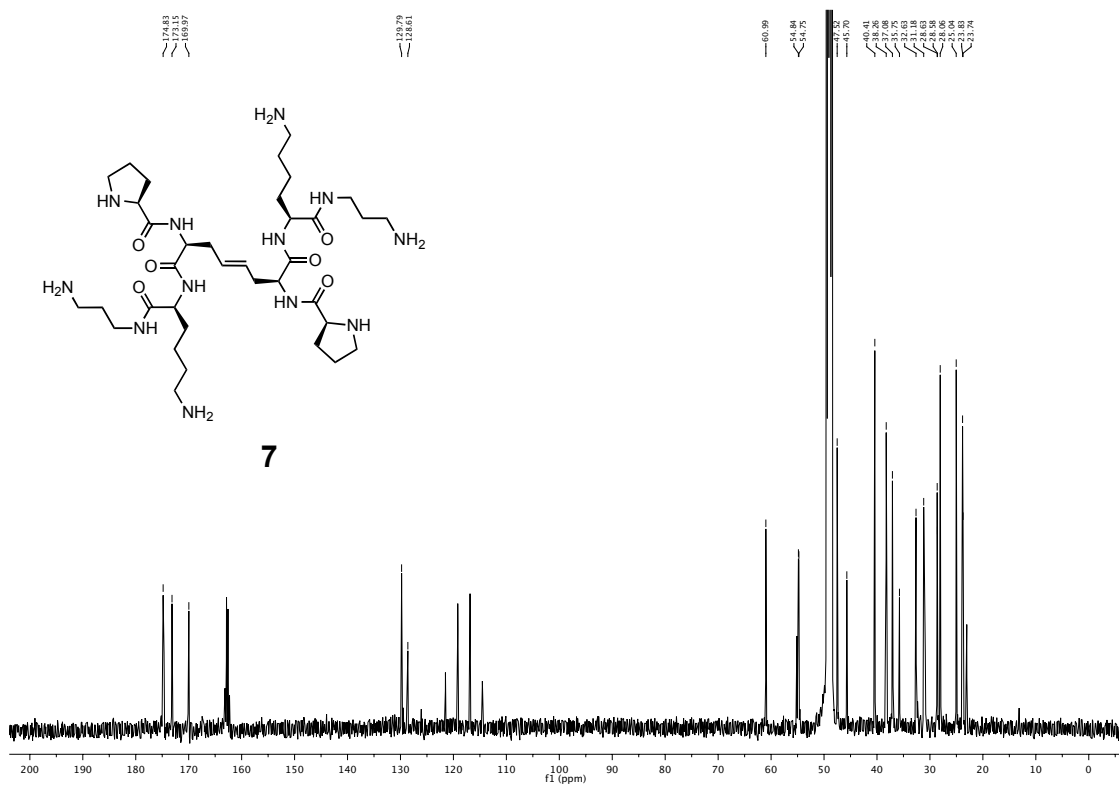

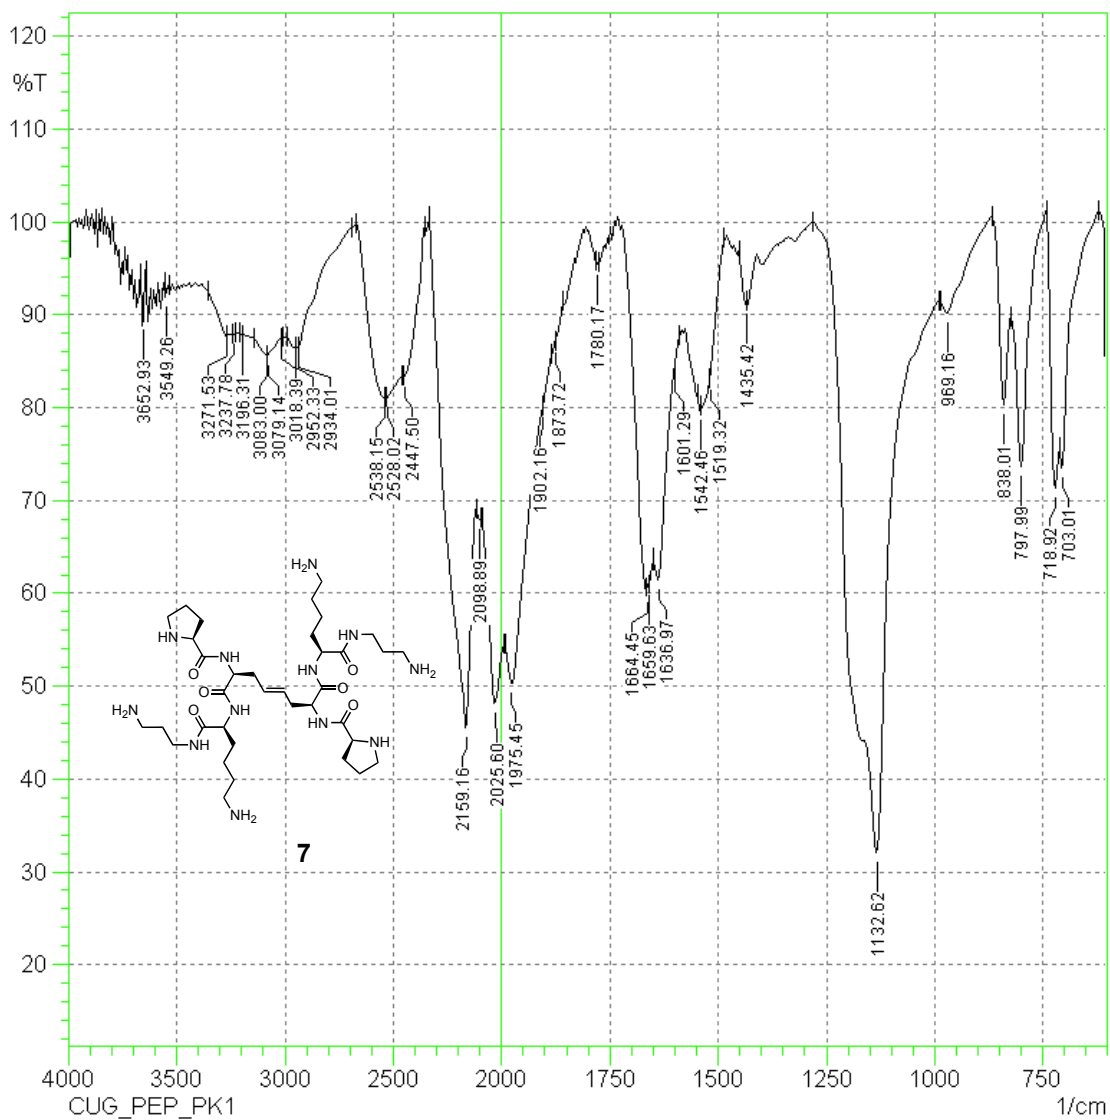

**Compound 8 and 9:** are constitutional isomers of compounds **4** and **5** in which the amino acid sequence **Lys-Algly-Pro-Benzo[g]quinoline** was re-ordered as **Pro-Algly-Lys-Benzo[g]quinoline**. This was done to verify the importance of the amino acid sequence on CUG repeat RNA binding. The peptide coupling procedure previously describe above was used to synthesize the resin bound scrambled monomer. The resin-bound scrambled monomer was split into two equal parts of 0.5 g each. One part was cleaved and used as solution phase component for olefin metathesis reaction employing Grubbs' second-generation catalyst (**Supplementary Scheme 4**). The products were isolated and purified by reversed phase preparative HPLC, to yield **8** and **9** as a 2:3 ratio of *Z*- and *E* isomers respectively. Olefin geometries were assigned as described above.

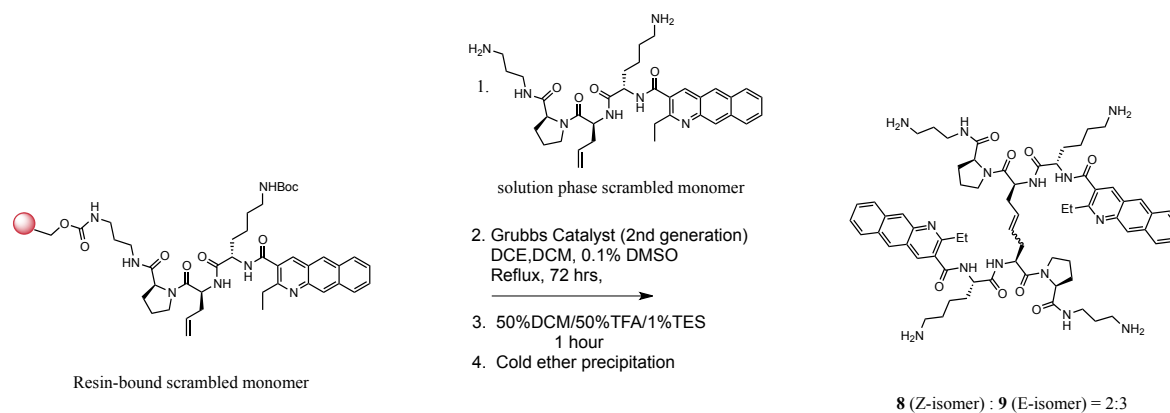

**Supplementary Scheme 4.** Synthesis of analogs (**8** and **9**) with scrambled amino acid sequence by olefin metathesis.

HPLC trace for compound **8** (minor *Z*-isomer)

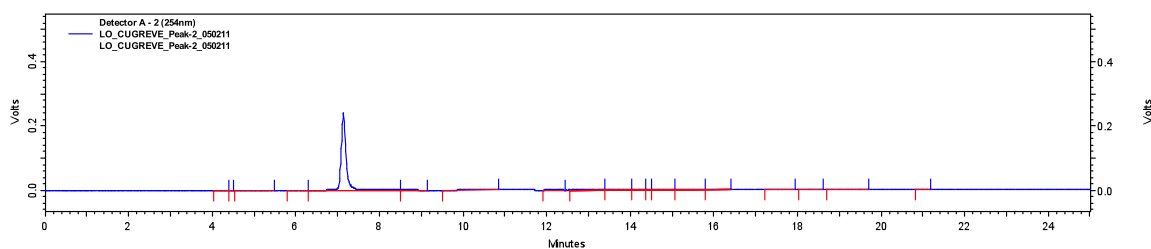

HPLC trace for compound **9** (major E-isomer)

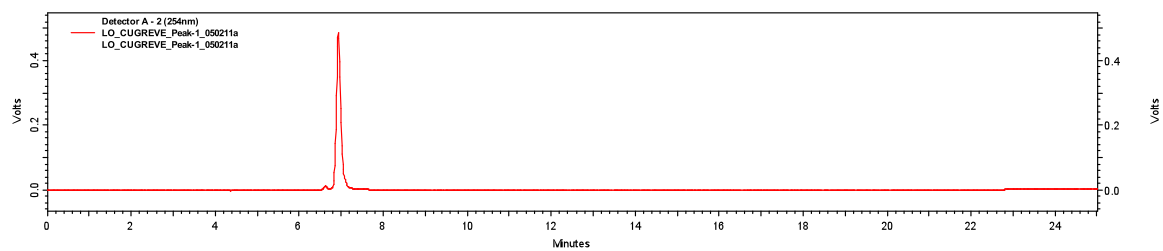

Overlay of HPLC traces for **8** and **9**

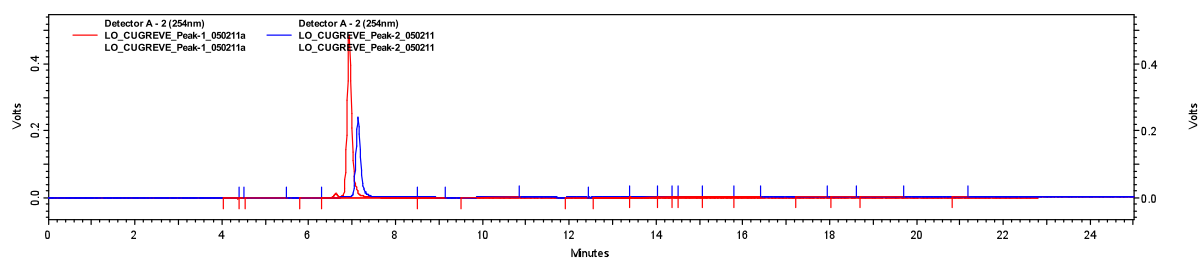

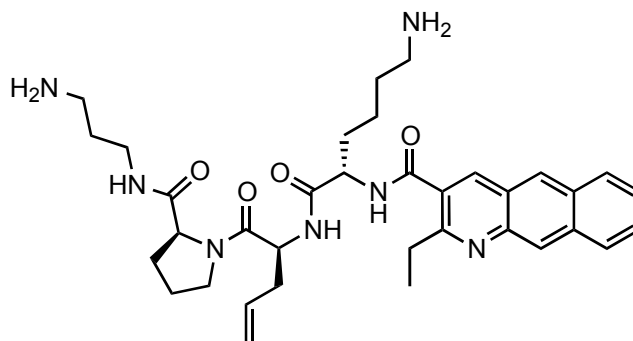

**scrambled monomer**

FT-IR (neat): 3653.89, 3631.23, 3570.96, 3236.33, 3177.51, 3157.74, 3117.23, 3041.53, 2957.64, 2933.53, 2537.18, 2527.06, 2448.46, 2159.16, 2097.93, 2026.08, 1973.53, 1880.47, 1874.68, 1854.43, 1668.79, 1663.97, 1660.11, 1654.33, 1647.1, 1637.93, 1632.63, 1629.26, 1539.57, 1518.36, 1430.6, 1421.92, 1194.82, 1176.01, 1126.35, 923.84, 880.44, 833.19, 797.51, 718.43.

$^1\text{H}$  NMR (400 MHz,  $\text{CD}_3\text{OD}$ )  $\delta$ : 9.12 (s, 1H), 8.74 (s, 1H), 8.55 (s, 1H), 8.02 (t,  $J = 8.6$  Hz, 1H), 7.57 (dd,  $J = 17.9, 7.2$  Hz, 1H), 5.70 (dd,  $J = 24.5, 14.9$  Hz, 2H), 5.12 – 4.88 (m, 15H), 4.50 (s, 1H), 4.41 (s, 1H), 4.15 (s, 1H), 3.67 (s, 1H), 3.50 (d,  $J = 4.0$  Hz, 1H), 3.23 (s, 3H), 3.10 (d,  $J = 14.3$  Hz, 2H), 2.77 (s, 3H), 2.65 (s, 1H), 2.41 (s, 1H), 2.35 – 2.18 (m, 1H), 2.01 (d,  $J = 6.4$  Hz, 2H), 1.95 – 1.33 (m, 8H), 1.29 (s, 1H).

$^{13}\text{C}$  NMR (126 MHz,  $\text{CD}_3\text{OD}$ )  $\delta$ : 175.37, 173.56, 172.25, 167.01, 165.25, 147.00, 137.61, 134.65, 134.46, 131.63, 131.39, 130.11, 129.63, 129.58, 129.38, 125.03, 119.67, 118.85, 61.95, 55.40, 52.71, 40.43, 38.08, 36.81, 36.55, 32.41, 30.83, 28.69, 28.12, 26.06, 23.91, 23.75, 14.50, 14.42, 14.34.

HRMS  $m/z$  calculated for  $\text{C}_{35}\text{H}_{47}\text{N}_7\text{O}_4$   $[\text{M}+\text{H}]^+$ : 630.3762: found: 630.3761.

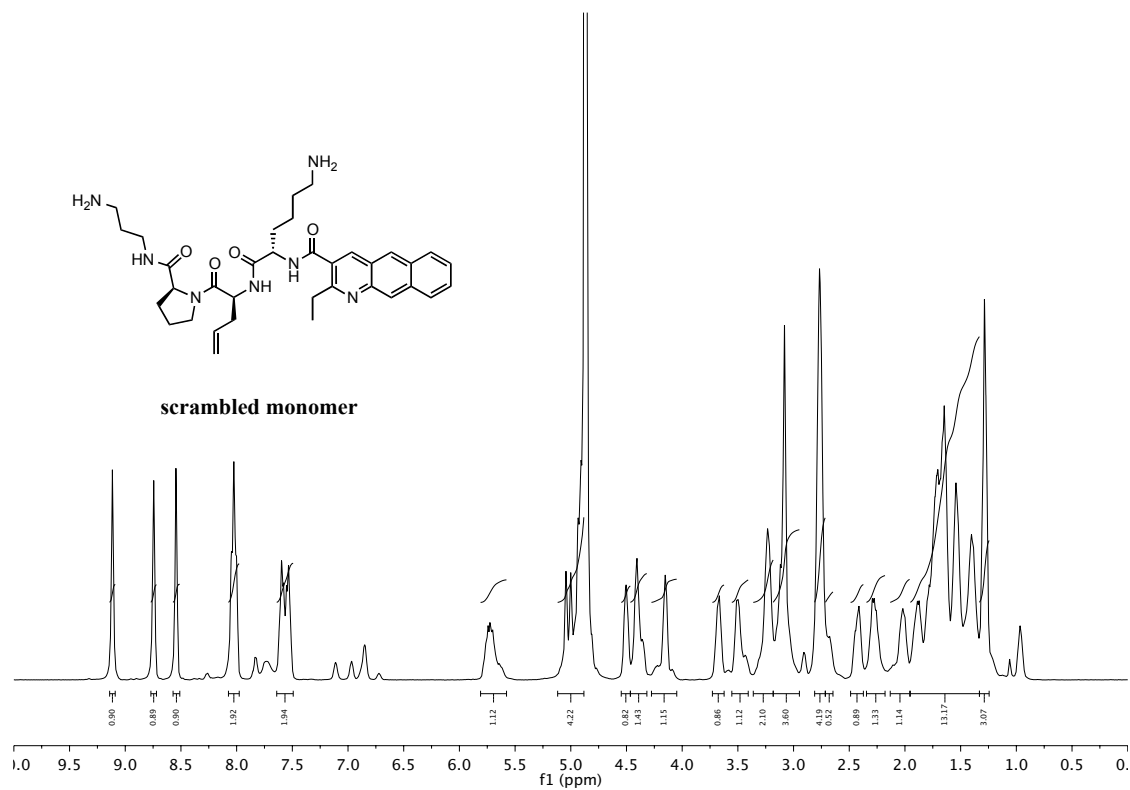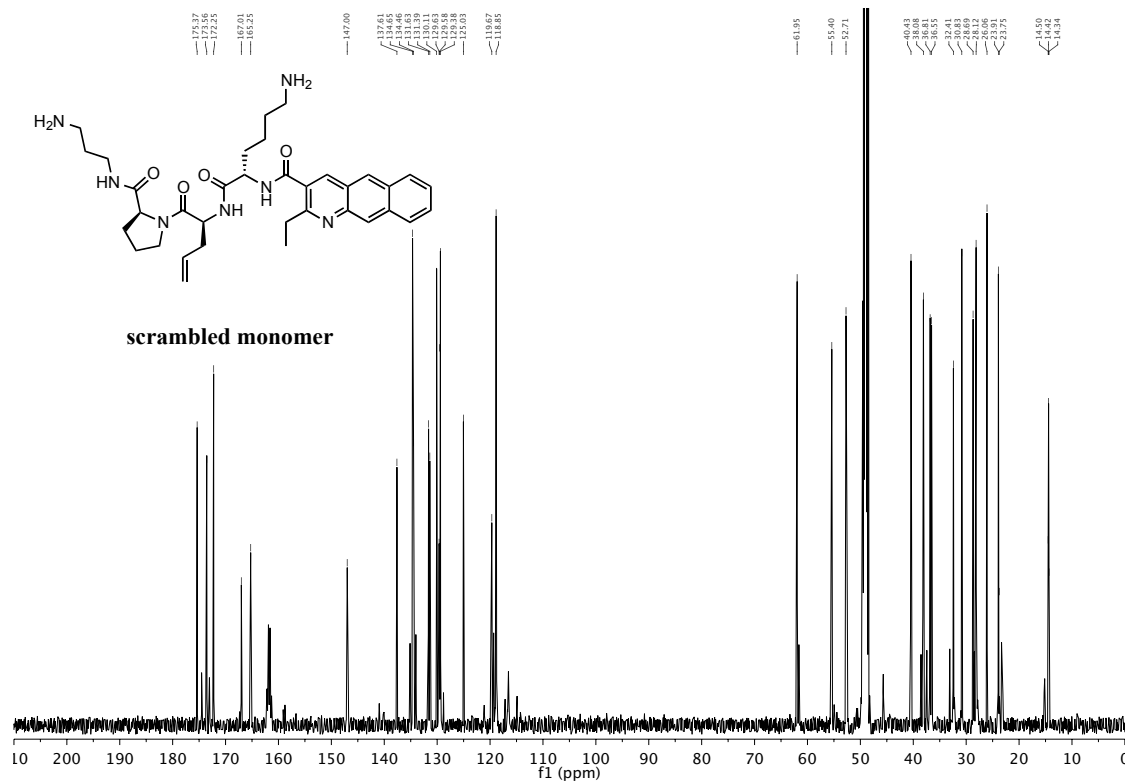

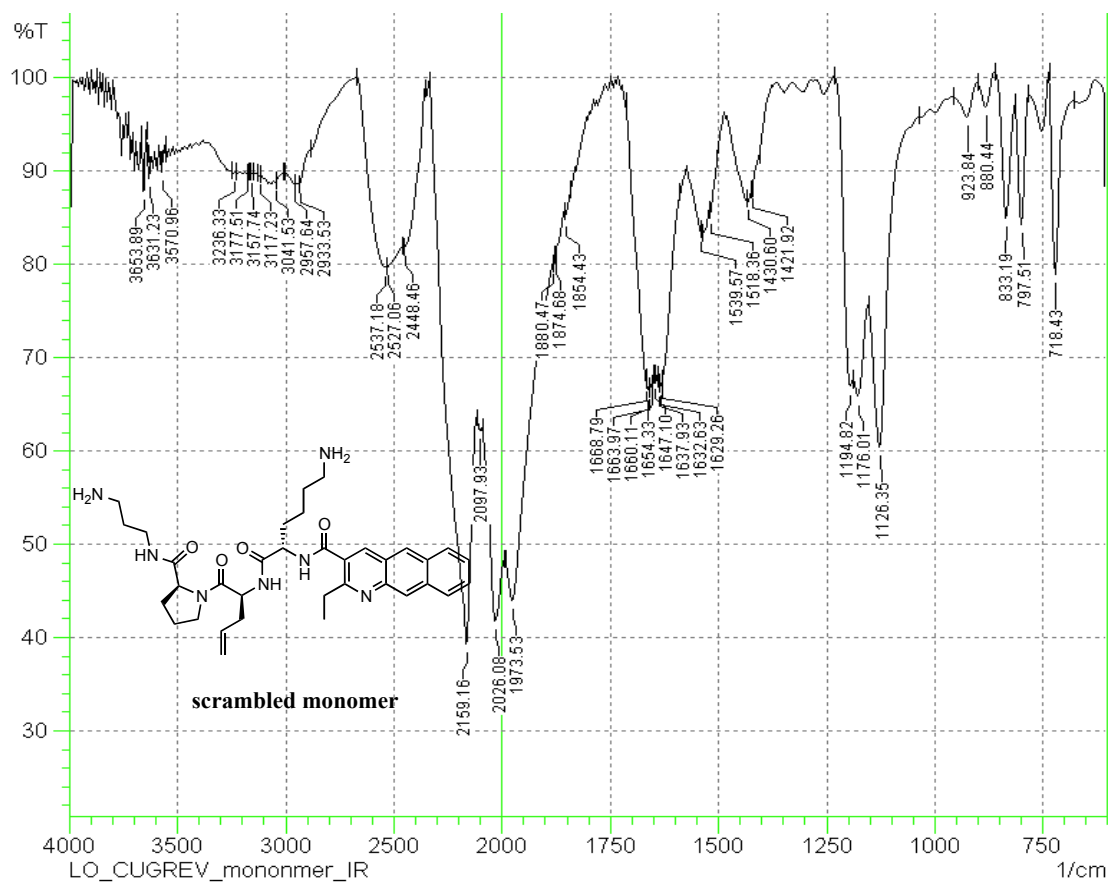



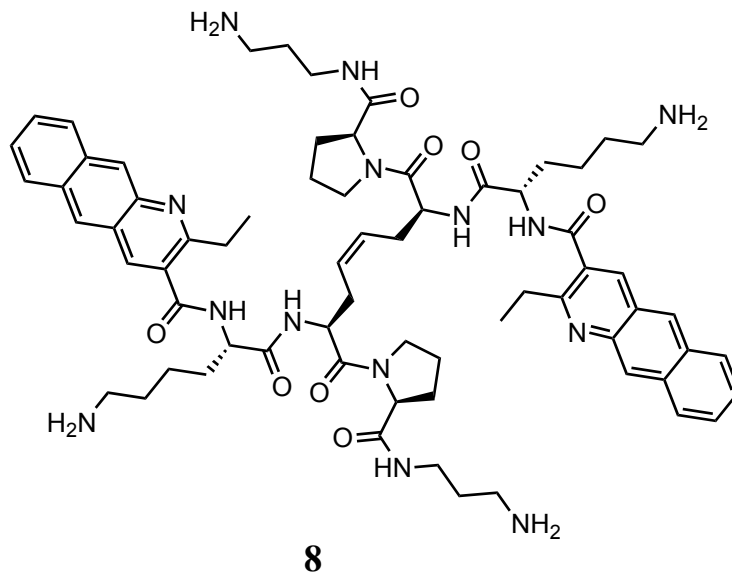

FT-IR (neat): 3298.53, 3268.15, 3199.2, 3078.18, 3048.28, 2988.01, 2879.52, 2831.31, 2661.58, 2547.31, 2460.04, 1782.59, 1662.52, 1643.24, 1636.97, 1535.23, 1430.12, 1401.19, 1354.42, 1310.54, 1257.98, 1193.37, 1179.39, 1127.8, 1057.4

$^1\text{H}$  NMR (500 MHz,  $\text{D}_2\text{O}$ )  $\delta$ : 8.77 (s, 2H), 8.23 (s, 2H), 7.90 (s, 2H), 7.74 (dd,  $J = 23.4, 8.7$  Hz, 4H), 7.54 (dt,  $J = 15.2, 7.0$  Hz, 4H), 5.75 (t,  $J = 4.6$  Hz, 2H), 4.95 – 4.85 (m, 2H), 4.83 (s, 8H), 4.77 (s, 3H), 4.71 – 4.64 (m, 3H), 4.44 – 4.34 (m, 4H), 3.90 (s, 1H), 3.80 (dd,  $J = 17.0, 7.0$  Hz, 2H), 3.39 – 3.20 (m, 9H), 3.16 (dd,  $J = 13.7, 7.5$  Hz, 2H), 3.03 (dd,  $J = 18.3, 8.0$  Hz, 13H), 2.95 (s, 1H), 2.78 (d,  $J = 14.4$  Hz, 2H), 2.66 (s, 1H), 2.35 (dd,  $J = 12.9, 8.3$  Hz, 3H), 2.09 (ddd,  $J = 19.6, 12.5, 6.1$  Hz, 5H), 1.99 – 1.80 (m, 15H), 1.78 – 1.69 (m, 5H), 1.53 (d,  $J = 7.8$  Hz, 1H), 1.43 – 1.34 (m, 7H).

$^{13}\text{C}$  NMR (126 MHz,  $\text{D}_2\text{O}$ )  $\delta$ : 174.32, 172.91, 171.14, 165.84, 145.12, 135.20, 131.92, 131.59, 130.32, 129.67, 128.33, 127.61, 127.09, 122.18, 117.00, 60.82, 54.05, 51.36, 48.20, 39.08, 37.01, 36.09, 30.60, 29.64, 28.69, 26.63, 26.50, 26.38, 24.71, 22.33, 14.66, 13.25.

HRMS  $m/z$  calculated for  $\text{C}_{68}\text{H}_{91}\text{N}_{14}\text{O}_8$   $[\text{M}+\text{H}]^+$ : 1231.7139; found: 1231.7107

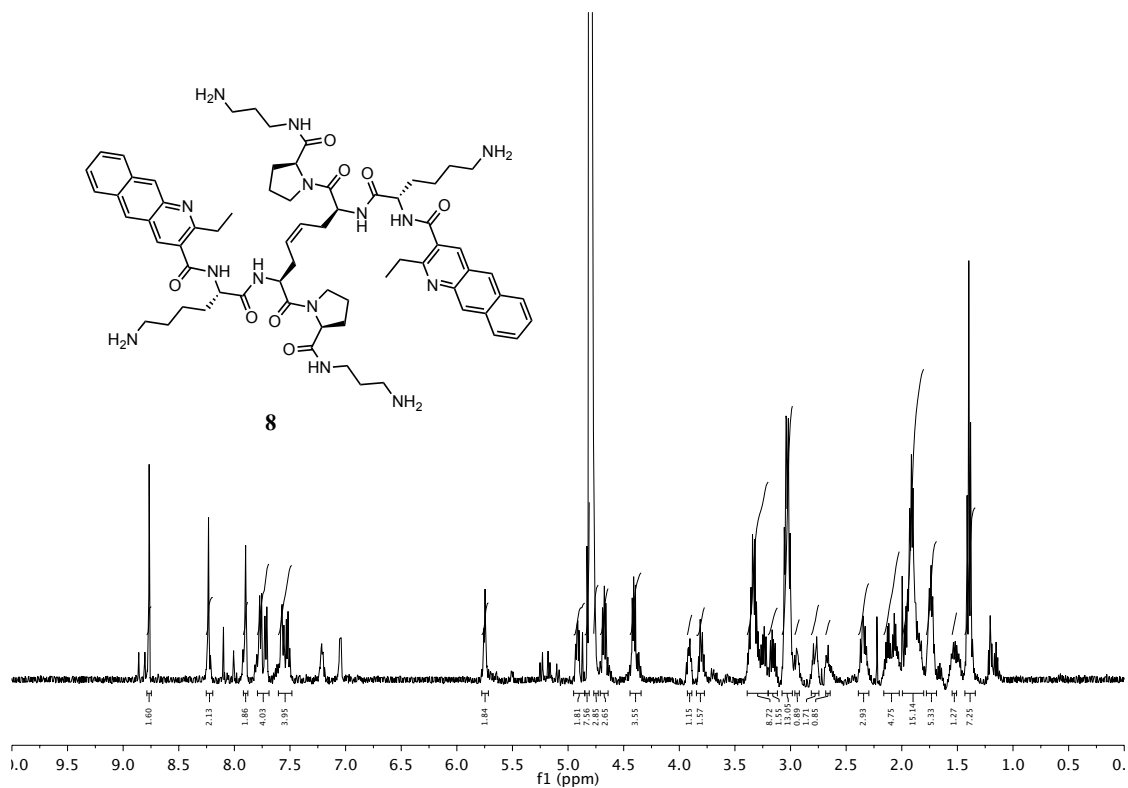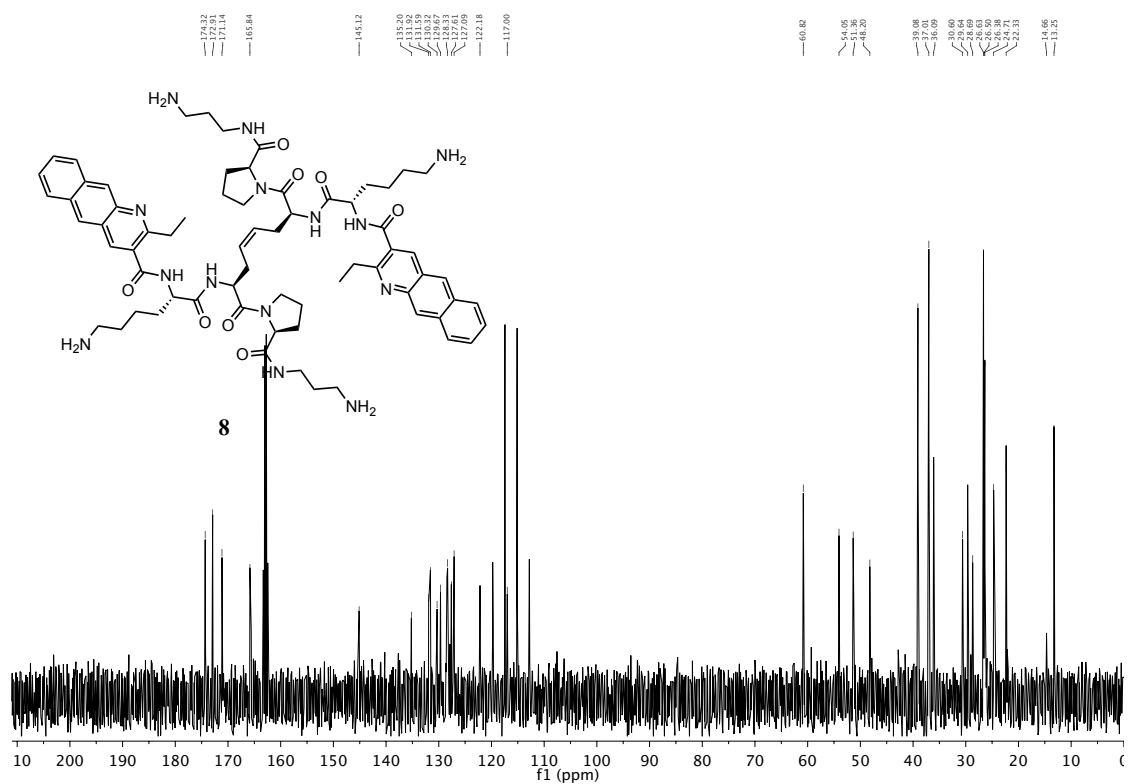

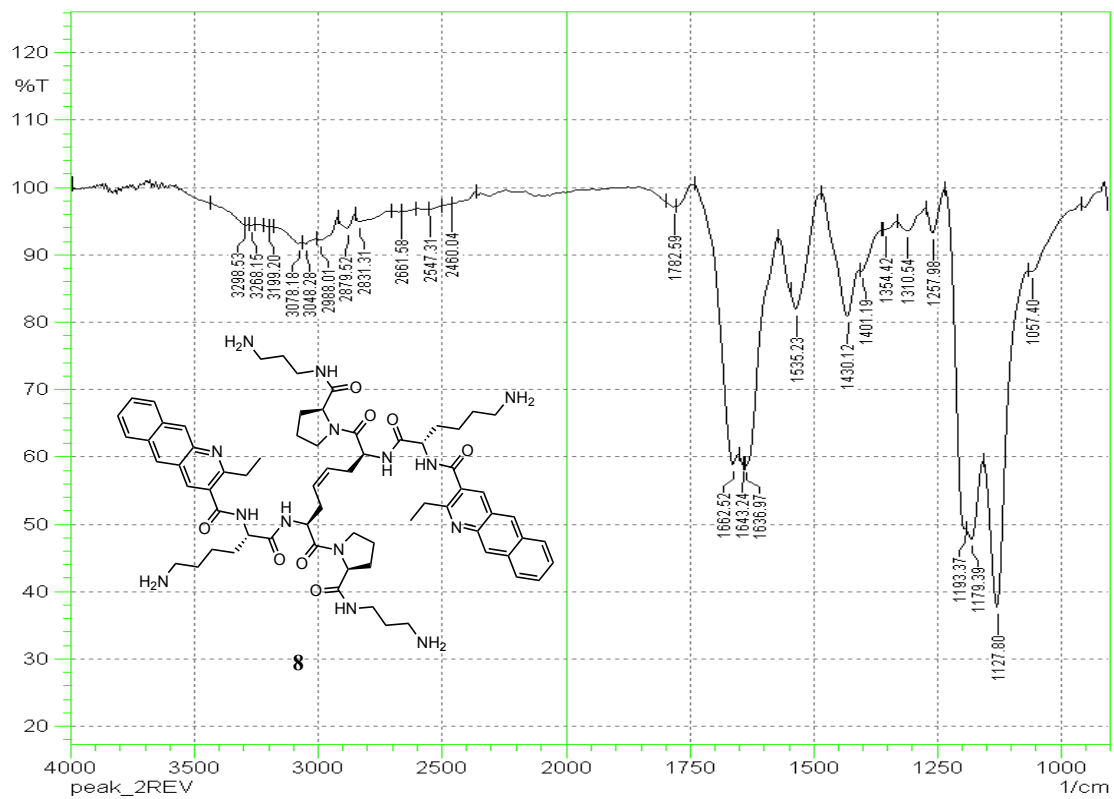

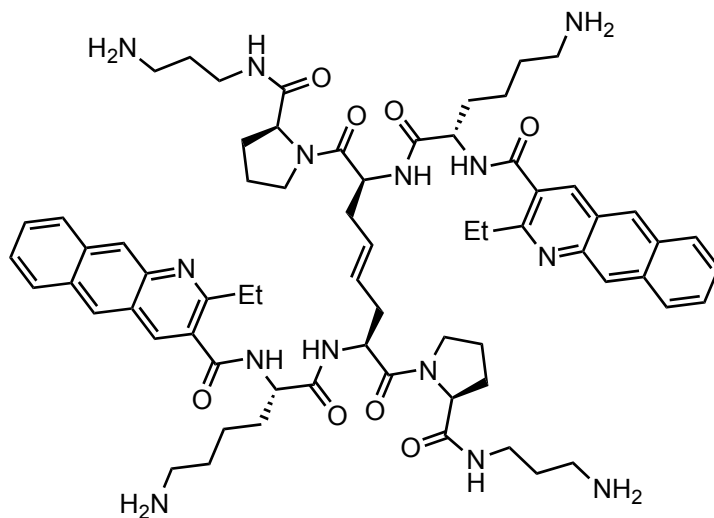

9

FT-IR (neat): 3289.37, 3062.75, 2946.55, 2879.04, 1666.86, 1660.6, 1650.47, 1644.68, 1633.11, 1537.16, 1531.37, 1519.8, 1514.98, 1439.28, 1434.46, 1428.19, 1196.75, 1180.84, 1127.32, 1059.81, 967.72, 881.41, 836.08, 798.47, 749.78, 720.85

$^1\text{H}$  NMR (500 MHz,  $\text{D}_2\text{O}$ )  $\delta$ : 8.63 (s, 1H), 8.05 (s, 1H), 7.71 (s, 1H), 7.55 (dd,  $J = 14.6$ , 8.4 Hz, 2H), 7.40 (t,  $J = 7.4$  Hz, 1H), 7.33 (t,  $J = 7.6$  Hz, 1H), 5.80 (d,  $J = 3.5$  Hz, 1H), 4.63 – 4.56 (m, 12H), 4.40 (dd,  $J = 14.0$ , 6.4 Hz, 7H), 3.97 (s, 3H), 3.82 (dd,  $J = 17.0$ , 7.2 Hz, 3H), 3.34 (dt,  $J = 14.2$ , 7.1 Hz, 5H), 3.25 – 3.16 (m, 4H), 3.04 (dt,  $J = 14.3$ , 5.7 Hz, 12H), 2.69 (d,  $J = 17.1$  Hz, 3H), 2.58 (s, 2H), 2.38 – 2.32 (m, 2H), 2.18 – 2.03 (m, 4H), 2.00 – 1.87 (m, 11H), 1.72 (dd,  $J = 14.7$ , 7.4 Hz, 8H), 1.53 (s, 5H), 1.41 (dt,  $J = 7.6$ , 6.1 Hz, 11H).

$^{13}\text{C}$  NMR (126 MHz,  $\text{D}_2\text{O}$ )  $\delta$ : 174.36, 172.95, 171.47, 165.73, 145.09, 134.81, 131.56, 131.30, 129.97, 129.56, 128.52, 128.20, 128.10, 127.42, 126.98, 121.99, 116.70, 60.81, 54.10, 51.65, 48.28, 39.09, 37.02, 36.10, 33.91, 30.59, 29.62, 26.66, 26.54, 26.40, 24.73, 22.35, 13.29.

HRMS  $m/z$  calculated for  $\text{C}_{68}\text{H}_{91}\text{N}_{14}\text{O}_8$   $[\text{M}+\text{H}]^+$ : 1231.7139; found: 1231.7155

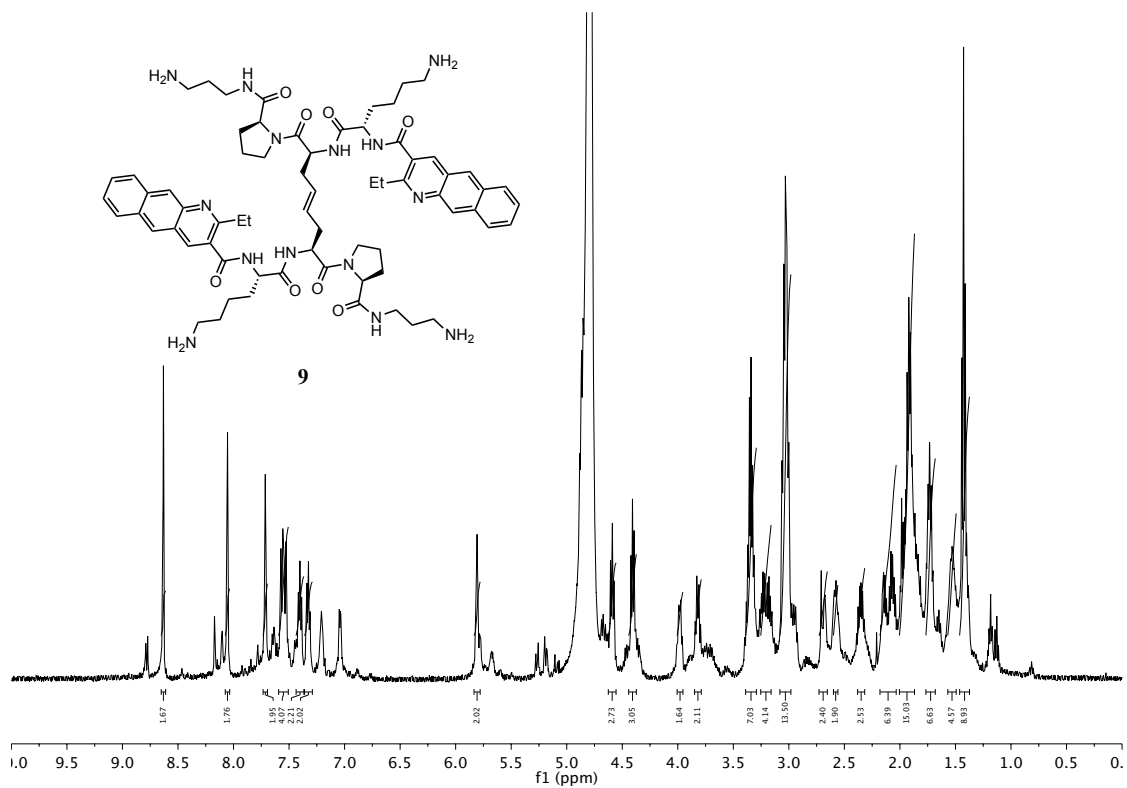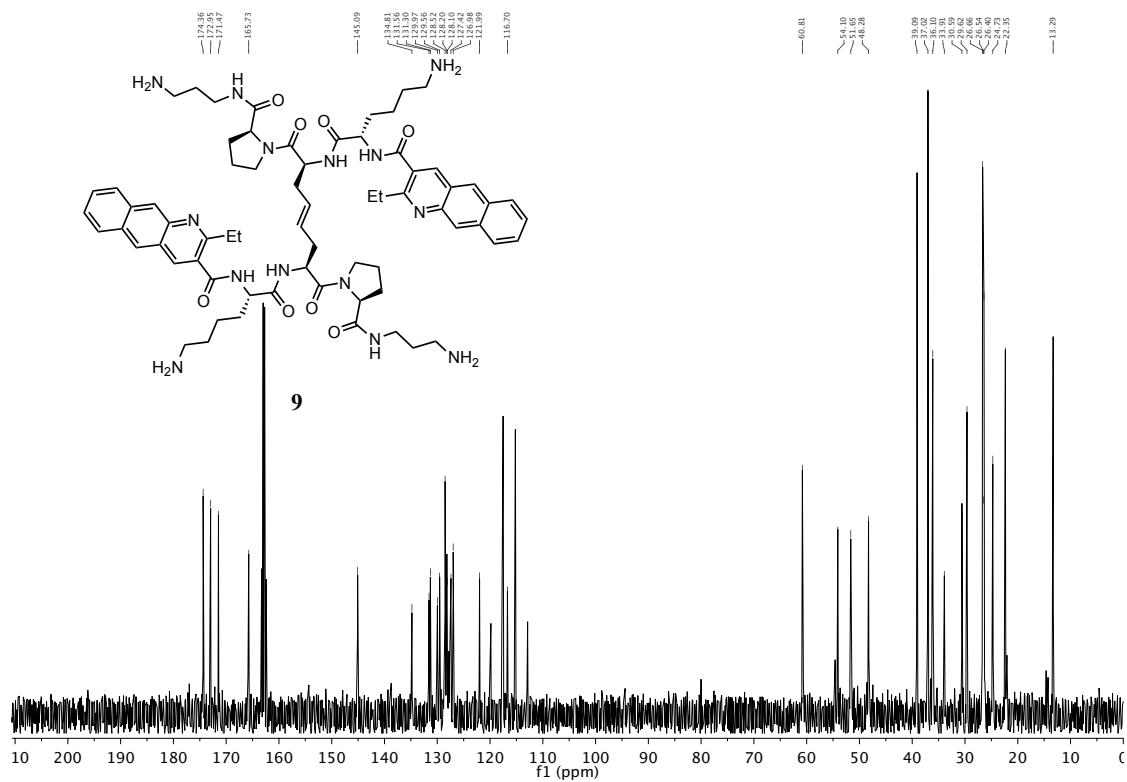

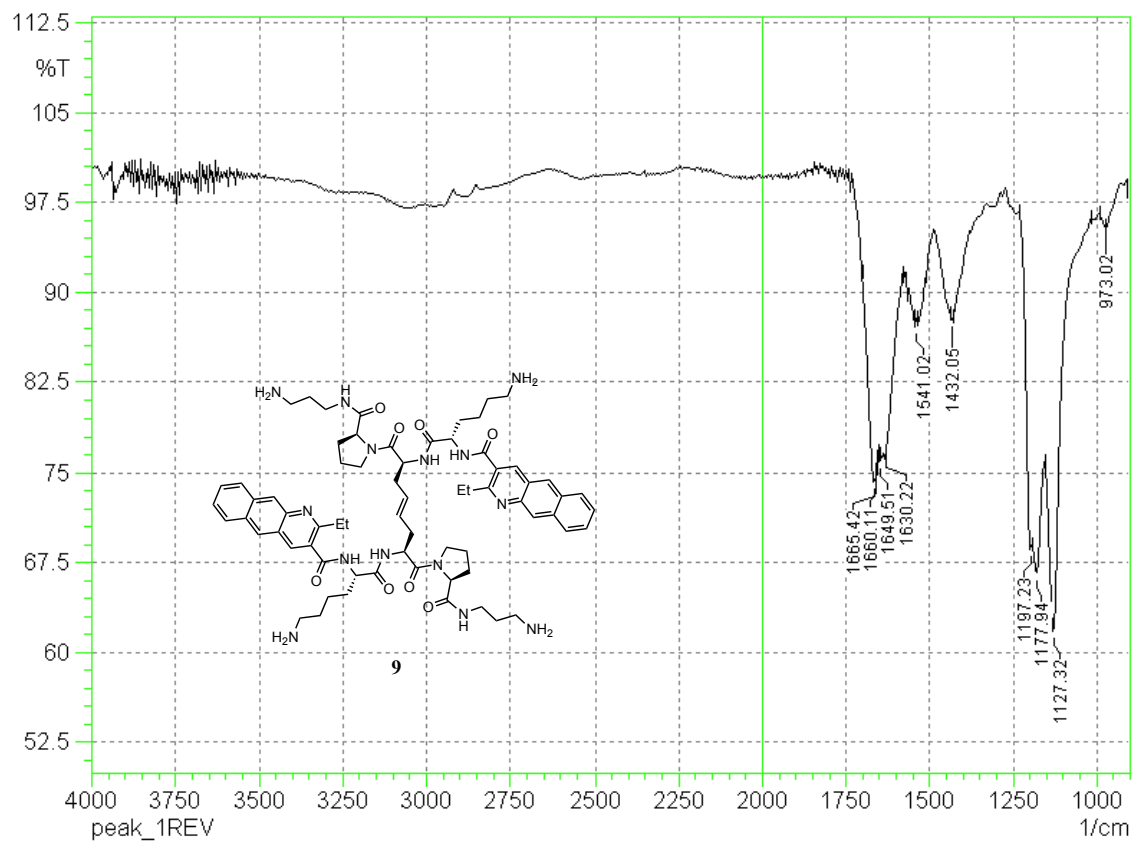

Compounds **10** and **11** were synthesized by slight modification to the procedures for the synthesis of compounds **4-9**. In order to obtain the required 8-carbon linker spacing, the (L)-Fmoc-Allylglycine was substituted with the unnatural amino acid (L)-Fmoc-pentenylglycine which served as the olefin for the dimerization of the monomer by self metathesis reaction employing Grubbs' second generation catalyst. L-N-Fmoc-pentenylglycine was synthesized using a procedure reported by Meyers *et al.*, in which (*R, R*)-(-)-pseudoephedrine is used as a chiral auxiliary for asymmetric alkylation (10). Briefly, (*R, R*)-(-)-pseudoephedrine was converted to pseudoephedrine glycinamide hydrate (**supplementary scheme 5 (a)**) by reaction with glycine methyl ester hydrochloride using methods described in the literature. (*S*)-2-amino-*N*-((1*R,2R*)-1-hydroxy-1-phenylpropan-2-yl)-*N*-methylhept-6-enamide (**supplementary scheme 5 (b)**): Anhydrous lithium chloride (5.29 g, 125.2 mmol, 4.00 equiv) was taken in an oven-dried, 3-necked round-bottom flask equipped with two glass stoppers and an inlet adapter connected to a source of vacuum. Vacuum was applied to the flask and the solid lithium chloride was dried using a low flame. The flask was then cooled to 23 °C and flushed with nitrogen.

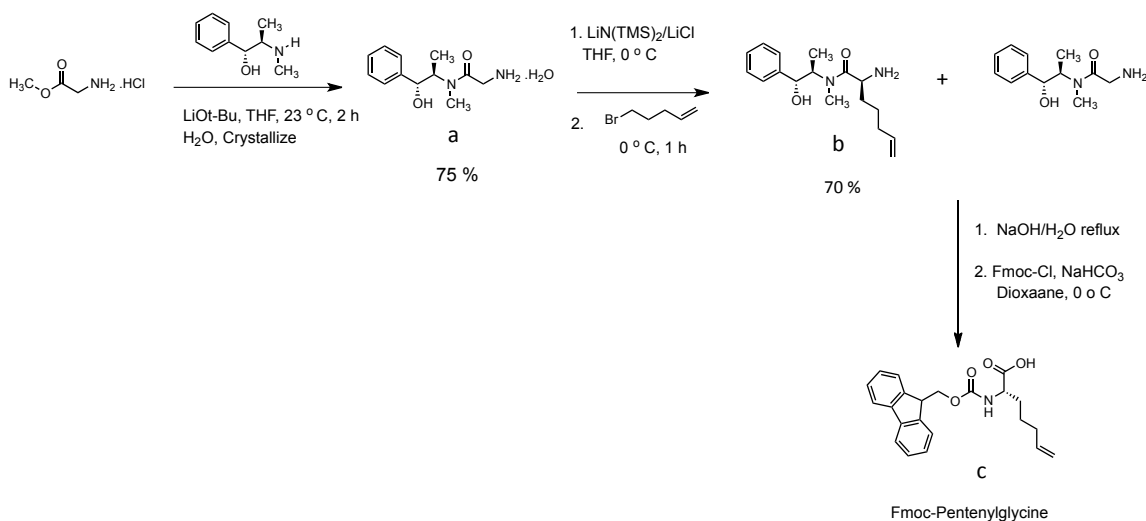

**Supplementary Scheme 5:** Synthesis of L-Fmoc-pentenylglycine (**c**) by asymmetric alkylation of pseudoephedrine glycinamide hydrate.

Tetrahydrofuran (90 mL) was added to the flask through a pressure equalizing addition funnel and the resulting suspension was stirred at 23 °C for 20 minutes. (*R, R*)-(-)-

pseudoephedrine glycinate hydrate (**a**), (**supplementary Scheme 5**) (7.5 g, 31.3 mmol, 1 equiv) was added to the reaction mixture in portions for 5 minutes resulting in a cloudy solution. The solution was cooled to 0 °C in an ice bath and a 1 M solution of lithium hexamethyldisilazide in tetrahydrofuran (100 mL, 100 mmol, 3.20 equiv) was added dropwise via addition funnel. The speed of the addition was regulated such that the temperature of the reaction did not exceed 3 °C as monitored by a thermometer inserted in the reaction flask via an adapter. After the addition of base was complete, the reaction mixture was stirred at 0 °C for 20 minutes, and 5-bromopentene (4.9 g, 32.8 mmol, 1.05 equiv) was added slowly by syringe. The reaction mixture was stirred at 0 °C for 1 h. Water (75 mL) was added and the resulting biphasic mixture was acidified to pH 0 by the addition of aqueous hydrochloric acid (6 M, 45 mL). The acidified aqueous solution was then extracted with ethyl acetate (100 mL). The ethyl acetate layer was separated and extracted sequentially with single 50 mL portions of 3 M and 1 M aqueous hydrochloric acid solution, respectively. The aqueous layers were combined and cooled to 5 °C by stirring in an ice-water bath. The cold solution was basified to pH 14 by the addition of 50% aqueous sodium hydroxide solution (30 mL). The basified solution was then extracted sequentially with one 120-mL portion and three 40-mL portions of dichloromethane. The combined organic extracts were dried over anhydrous solid potassium carbonate, filtered and concentrated *in vacuo* resulting in a yellow oily product. Attempts to recrystallize the crude product by analogy to (10) were not successful. However, unreacted (*R, R*)-(-)-pseudoephedrine glycinate hydrate did crystallize, allowing its separation from the desired (*S*)-2-amino-*N*-((1*R*,2*R*)-1-hydroxy-1-phenylpropan-2-yl)-*N*-methylhept-6-enamide (**b**) (70 %, HPLC). This crude product was used for the next stage of the reaction without further purification.

Conversion of (**b**) to Fmoc-L-pentenylglycine: to impure (**b**) (8.5 g, 29.3 mmol, 1 equiv) in a 100 mL round bottom flask was added aqueous 1 M sodium hydroxide (58.6 mmol, 2 equiv.) and water (40 mL). The resulting solution was heated to reflux for 2 h and then allowed to cool to RT. Pseudoephedrine was observed to crystallize from the solution upon cooling. The solids were filtered via vacuum filtration and the aqueous solution was extracted with dichloromethane (50 mL and 30 mL) to remove residual pseudoephedrine.



The organic layers were individually back-extracted with water (30 mL); the aqueous extracts were then combined with the original solution and concentrated *in vacuo* to a volume of 45 mL. To this concentrated solution dioxane (45 mL) and sodium bicarbonate (4.92 g, 58.6 mmol, 2 eq) were added, followed by cooling in an ice bath for 20 minutes. 9-flourenylmethoxychloride (8.3 g, 32.2 mmol, 1.1 eq) was added to the cooled solution and the reaction stirred for 3 h (the first 1 h in an ice bath). Water (250 mL) was added, and the solution was washed with 1:1 ethyl acetate:ether (400 mL). The organic layer was washed with a 2% sodium bicarbonate solution (100 mL). The aqueous layers were combined and acidified to pH 1 with 1 N HCl and then extracted with ethyl acetate (2 x 100 mL). The organic layers were dried over sodium sulfate and concentrated *in vacuo*. The residue was dissolved in toluene (20 mL) and concentrated *in vacuo* to remove residual dioxane. The residue was again dissolved in chloroform (2 x 20 mL) and concentrated *in vacuo* yielding an amorphous solid (6.9 g, 67% yield) of impure Fmoc-pentenylglycine. Part of this impure product was purified by preparative HPLC for spectral characterization purposes, and the other part was used in the synthesis of compounds **10** and **11** (**Supplementary Scheme 6**) without purification. First the Fmoc-pentenylglycine was incorporated into the synthesis of the **extended monomer**, which was subjected to olefin self-metathesis in the presence of solution phase extended monomer. The HPLC trace for the monomer showed two major peaks: one resulting from Fmoc-pentenylglycine and the other from a non-alkylated glycine impurity. The final crude reaction product showed the disappearance of the extended monomer, as well as the formation of **10** and **11** as a mixture of isomers. These were separated by prep-HPLC and assigned as described above.

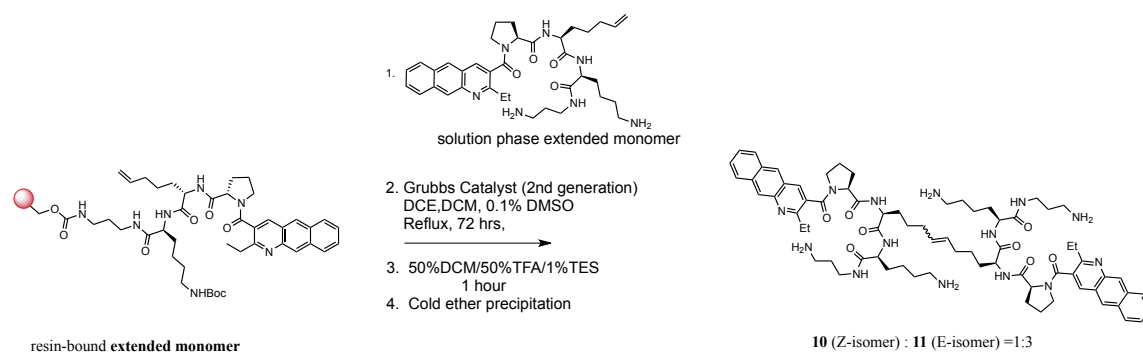

**Supplementary Scheme 6:** synthesis of compounds with extended linker (**10** and **11**) by olefin metathesis.

**HPLC trace for crude extended monomer**

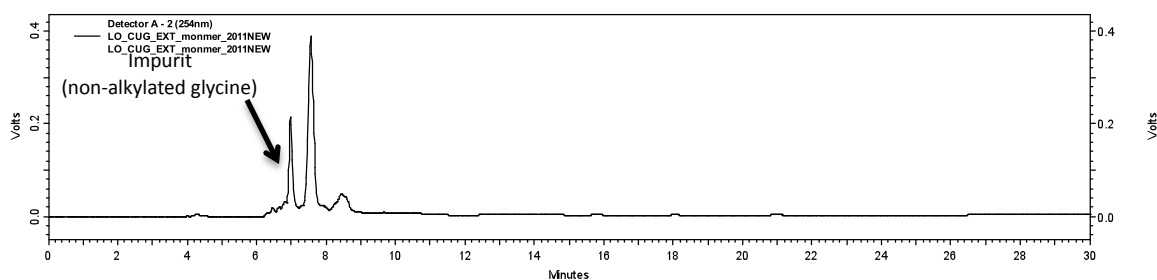

**HPLC trace for extended monomer**

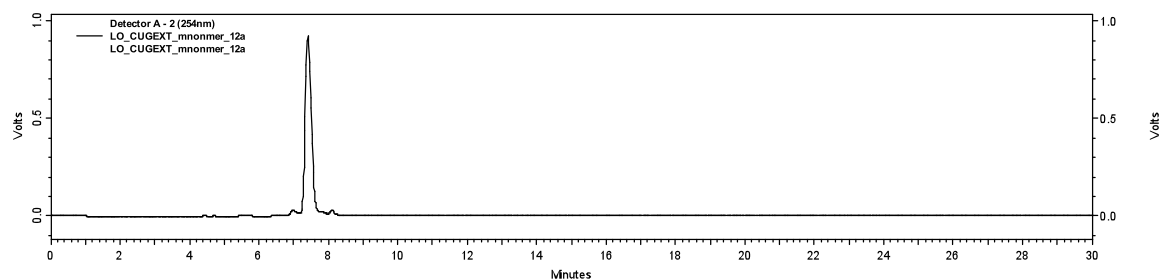

### HPLC trace for crude (**10** and **11**) metathesis reaction product

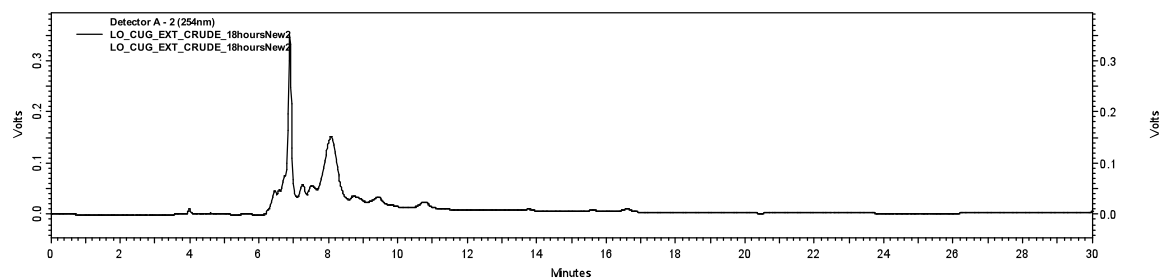

### HPLC trace for compound **10** (Z-isomer, minor product)

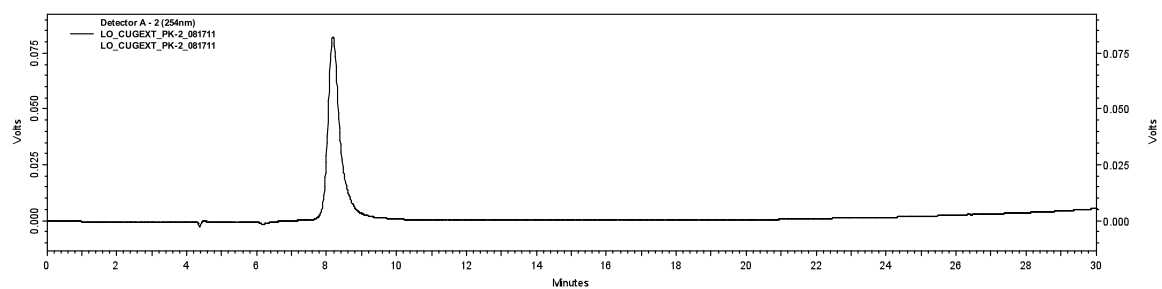

### HPLC trace for compound **11** (E-isomer, major product)

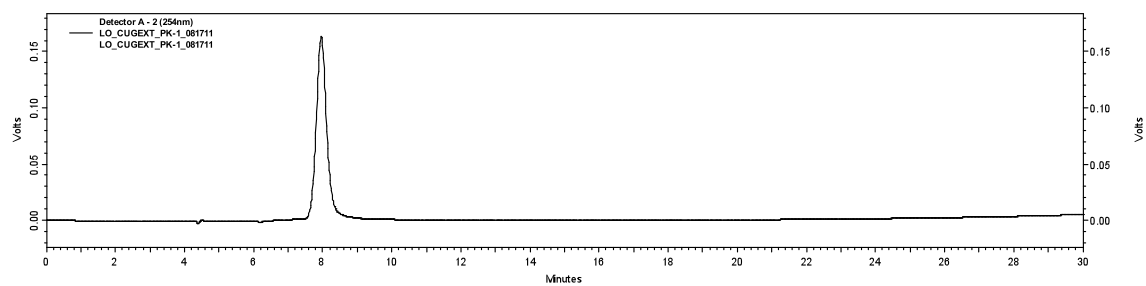

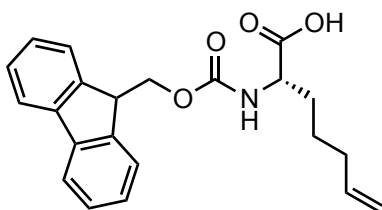

### L-Fmoc-Pentenylglycine

FT-IR (neat) 3651.96, 3335.18, 2952.33, 2933.53, 2529.95, 2445.09, 2159.16, 2098.89, 2026.56, 1713.15, 1839.48, 1873.23, 1974.49, 1709.3, 1702.06, 1681.81, 1646.13, 1529.45, 1479.3, 1442.66, 1426.74, 1419.99, 1249.79, 1156.25, 1104.17, 1081.03, 1035.7, 995.68, 969.65, 909.86, 791.24, 758.94, 734.35, 623.45

$^1\text{H}$  NMR (400 MHz,  $\text{CD}_2\text{Cl}_2$ )  $\delta$ : 7.77 (t,  $J = 9.8$  Hz, 2H), 7.68 – 7.52 (m, 2H), 7.49 – 7.37 (m, 2H), 7.33 (d,  $J = 7.0$  Hz, 3H), 5.89 – 5.67 (m, 1H), 5.43 – 5.31 (m, 1H), 5.01 (dd,  $J = 17.7, 11.4$  Hz, 2H), 4.52 (d,  $J = 5.7$  Hz, 1H), 4.42 (d,  $J = 6.4$  Hz, 1H), 4.35 (d,  $J = 4.8$  Hz, 1H), 4.24 (t,  $J = 6.5$  Hz, 1H), 3.30 (t,  $J = 7.0$  Hz, 1H), 3.23 – 3.05 (m, 1H), 2.06 (dd,  $J = 20.4, 6.5$  Hz, 2H), 1.89 (d,  $J = 6.7$  Hz, 1H), 1.80 – 1.64 (m, 1H), 1.64 – 1.55 (m, 1H), 1.55 – 1.29 (m, 2H).

$^{13}\text{C}$  NMR (126 MHz,  $\text{CD}_2\text{Cl}_2$ )  $\delta$ : 176.80, 156.10, 143.96, 143.79, 141.29, 137.99, 127.69, 127.06, 125.02, 124.80, 119.94, 114.89, 67.50, 66.94, 47.23, 47.18, 33.08, 31.53, 30.72, 27.27, 24.55.

HRMS  $m/z$  calculated for  $\text{C}_{22}\text{H}_{24}\text{NO}_4$   $[\text{M}+\text{H}]^+$ : 366.1700; found: 366.1703

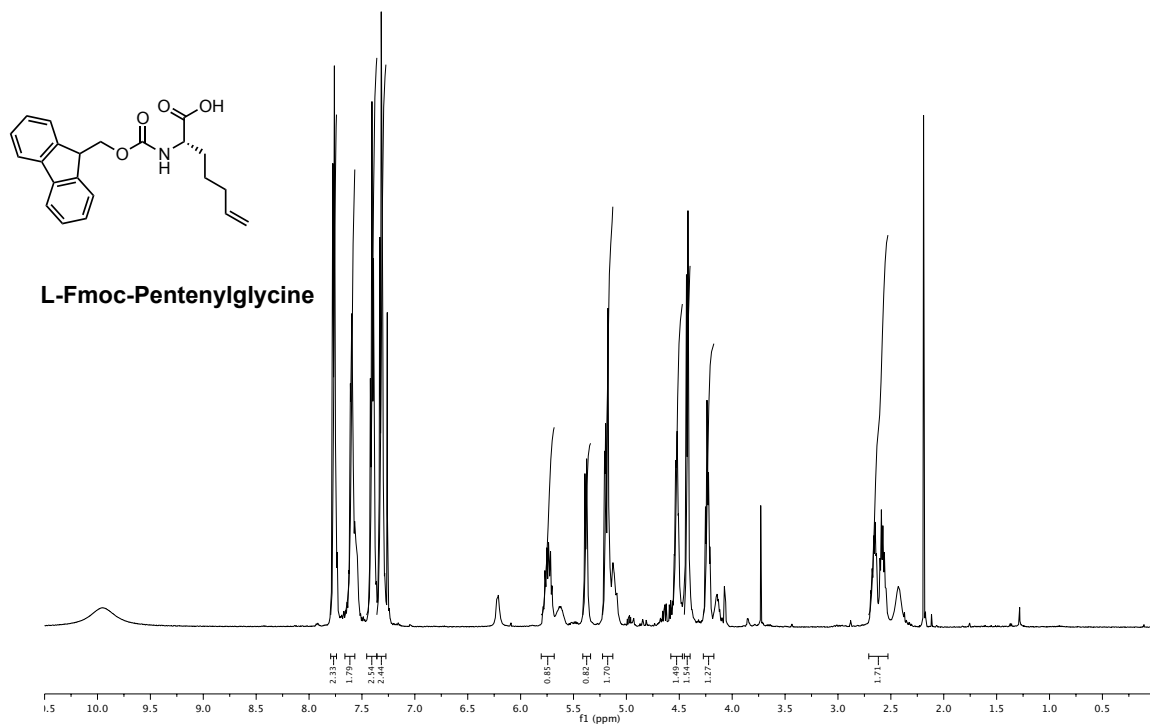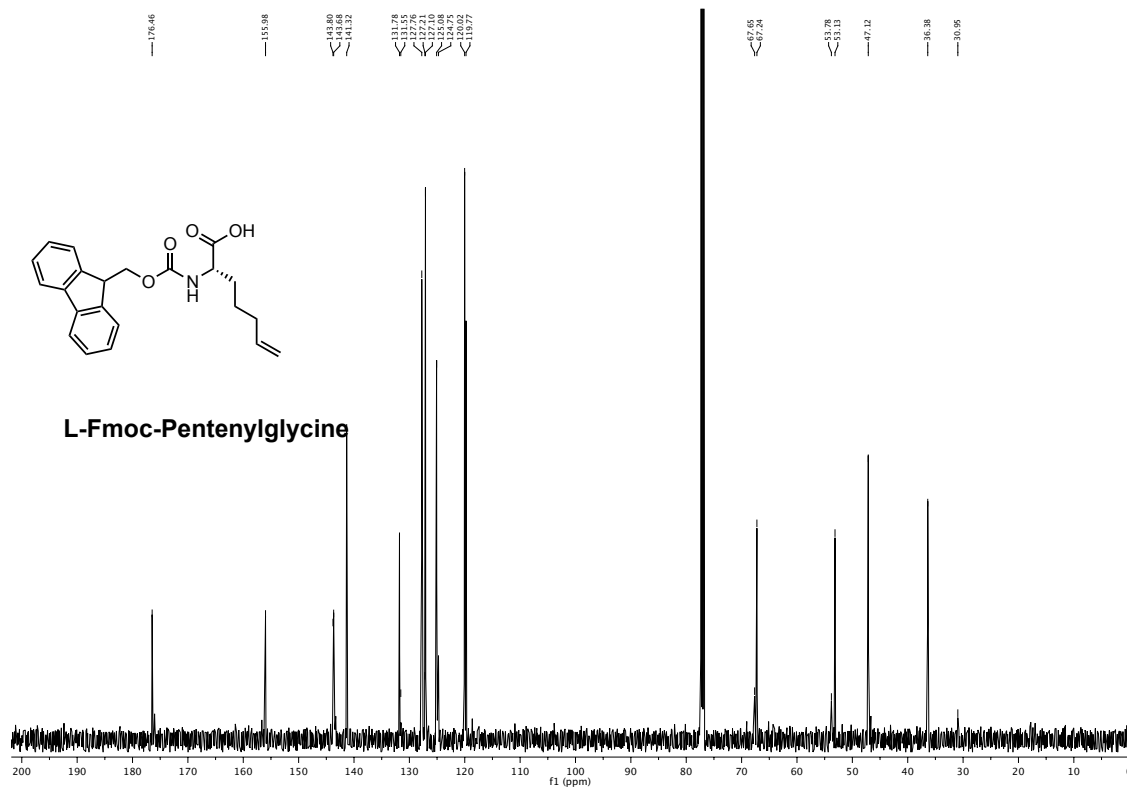

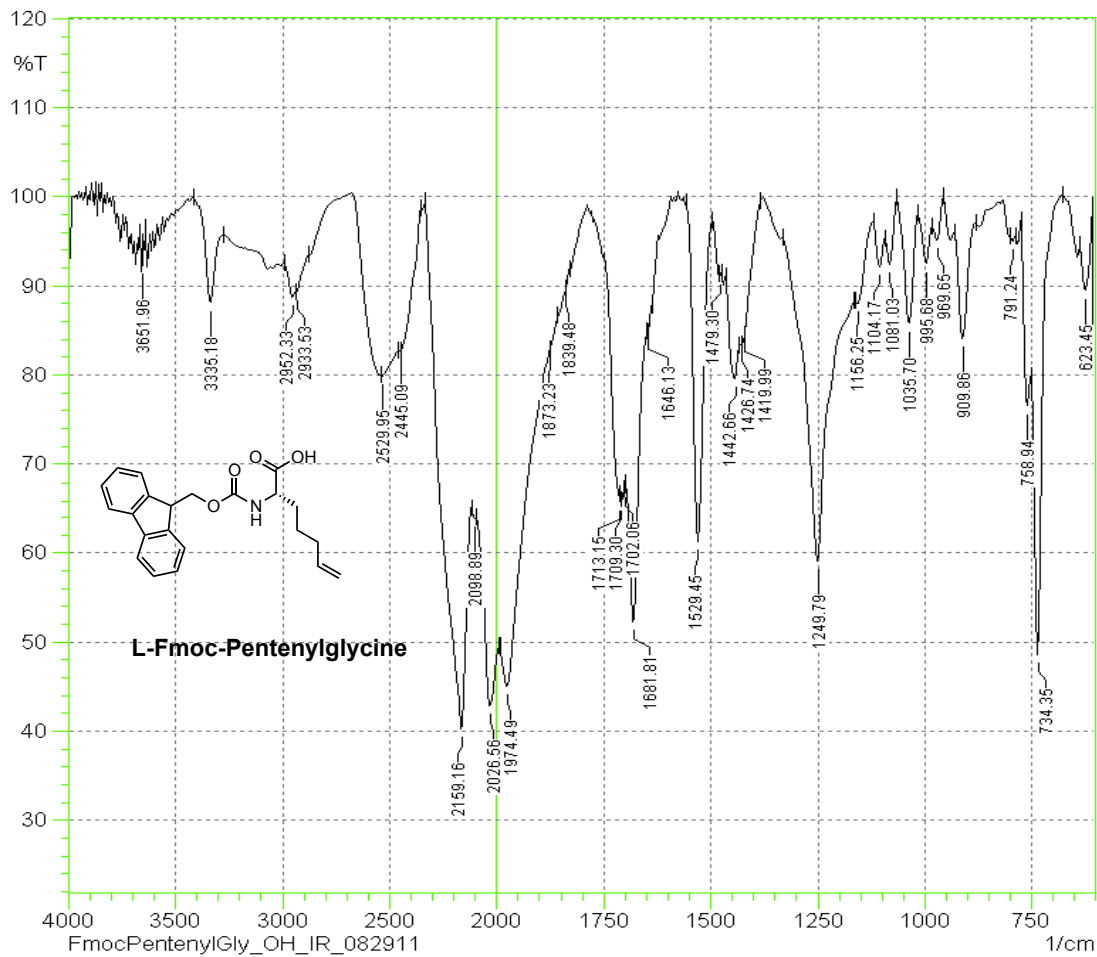

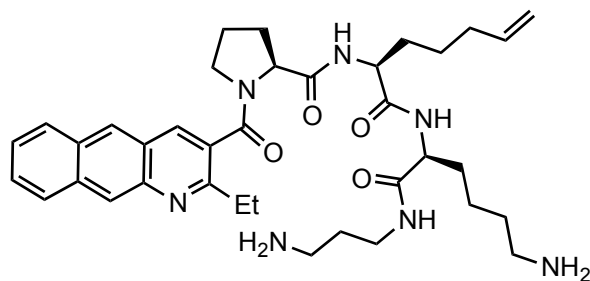

**extended monomer**

FT-IR (neat): 3655.34, 3272.01, 3073.84, 2940.28, 2880.97, 2538.15, 2448.95, 2159.16, 2027.05, 1974.49, 1666.86, 1662.04, 1655.77, 1649.99, 1645.17, 1639.86, 1536.68, 1434.46, 1404.56, 1195.3, 1176.01, 1128.28, 992.79, 968.68, 913.71, 880.93, 835.12, 798.47, 747.85, 719.88

<sup>1</sup>H NMR (400 MHz, CD<sub>3</sub>OD) δ: 9.16 (s, 1H), 8.83 (s, 1H), 8.69 (s, 1H), 8.20 – 8.11 (m, 2H), 7.76 – 7.61 (m, 2H), 5.75 (tt, J = 10.1, 6.6 Hz, 1H), 5.00 – 4.90 (m, 2H), 4.65 (dd, J = 7.9, 5.4 Hz, 1H), 4.47 – 4.10 (m, 3H), 3.76 (d, J = 5.8 Hz, 1H), 3.53 (dd, J = 16.5, 9.4 Hz, 2H), 3.38 – 3.04 (m, 7H), 2.92 – 2.71 (m, 5H), 2.42 – 2.25 (m, 1H), 2.11 – 1.20 (m, 22H), 1.13 (d, J = 6.4 Hz, 2H).

<sup>13</sup>C NMR (126 MHz, CD<sub>3</sub>OD) δ: 175.01, 174.87, 174.76, 174.42, 174.26, 174.16, 166.92, 164.16, 144.34, 142.78, 139.65, 139.47, 138.62, 137.51, 137.39, 134.49, 134.40, 131.10, 130.98, 130.73, 130.55, 130.26, 130.13, 129.66, 129.56, 129.41, 129.31, 125.46, 125.16, 122.05, 121.21, 120.76, 115.52, 115.30, 110.49, 63.28, 62.05, 61.61, 55.52, 55.43, 54.98, 54.77, 51.52, 49.79, 49.68, 49.56, 49.51, 49.41, 49.34, 49.17, 49.00, 48.83, 48.66, 40.61, 38.36, 38.29, 37.16, 37.09, 34.60, 34.44, 34.08, 33.34, 32.58, 32.53, 32.49, 31.76, 31.39, 28.81, 28.76, 28.20, 28.14, 26.55, 26.30, 26.19, 24.39, 24.05, 23.93, 14.34, 14.27, 14.19, 14.06.

LRMS (APCI<sup>+</sup>) *m/z* calculated for C<sub>22</sub>H<sub>24</sub>NO<sub>4</sub> [M+H]<sup>+</sup>: 658; found: 658, [M+Na]<sup>+</sup>680





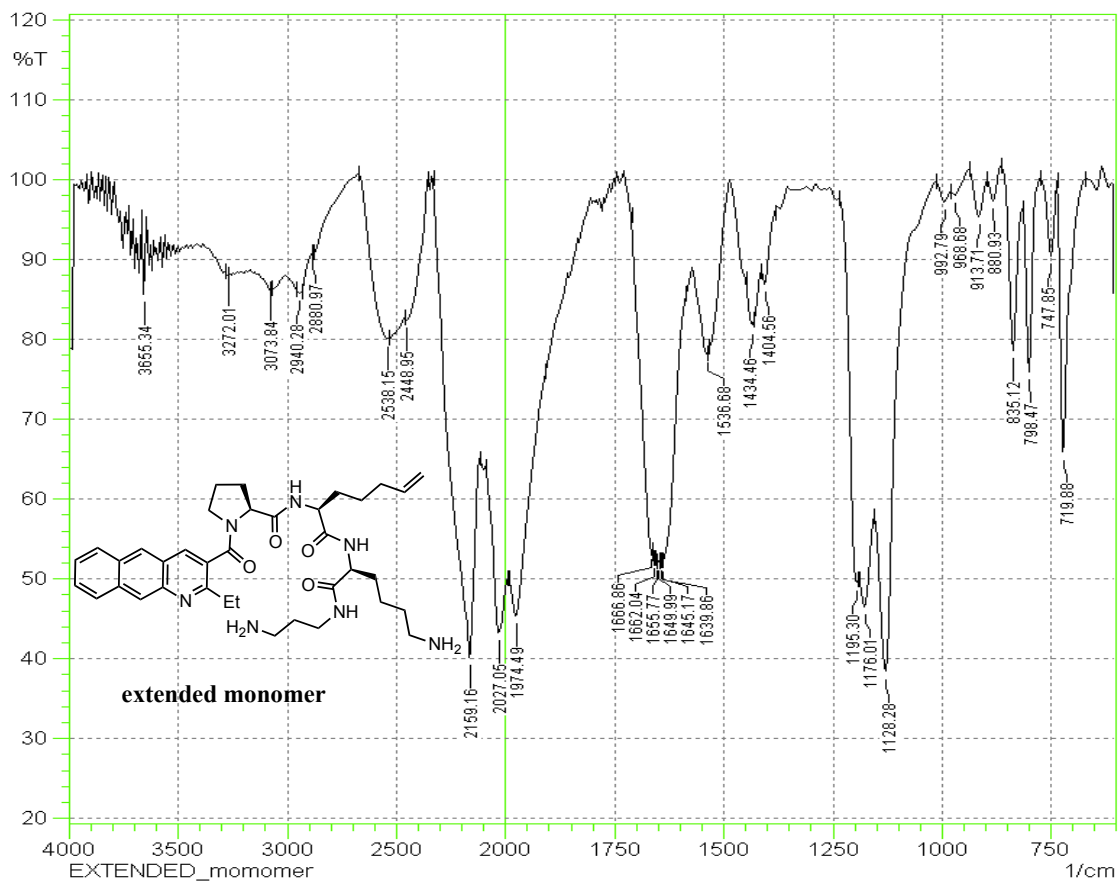

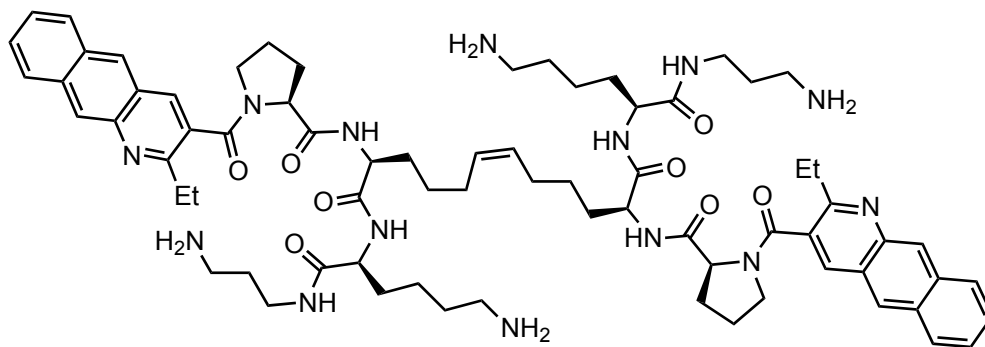**10**

FT-IR (neat): 3652.93, 3591.21, 3549.26, 3271.53, 3236.81, 3138.93, 3116.27, 3095.54, 3079.14, 3067.57, 3043.46, 2937.38, 2535.25, 2528.02, 2445.57, 2159.16, 2097.44, 2025.6, 1974.97, 1902.16, 1874.2, 1853.46, 1665.9, 1659.63, 1649.02, 1636.97, 1582.48, 1541.98, 1518.36, 1436.39, 1432.53, 1193.85, 1179.87, 1126.83, 969.16, 837.53, 798.96, 750.26, 720.36

<sup>1</sup>H NMR (400 MHz, D<sub>2</sub>O) δ: 8.65 (s, 2H), 8.56 (s, 4H), 8.01 (s, 2H), 7.94 – 7.89 (m, 4H), 7.64 – 7.39 (m, 4H), 7.18 – 6.98 (m, 4H), 5.45 – 5.33 (m, 2H), 5.06 – 4.85 (m, 1H), 4.35 – 3.91 (m, 2H), 3.96 – 3.17 (m, 3H), 3.18 (d, J = 5.9 Hz, 1H), 3.11 (ddd, J = 19.6, 12.5, 6.1 Hz, 9H), 2.85 – 2.73 (m, 9H), 2.70 (s, 1H), 2.47 (d, J = 73.1 Hz, 3H), 1.72 – 1.71 (m, 1H), 1.69 – 1.60 (m, 6H), 1.51 (ddd, J = 34.8, 19.6, 6.2 Hz, 12H), 1.35 – 1.10 (m, 12H).

<sup>13</sup>C NMR (126 MHz, D<sub>2</sub>O) δ: 173.61, 173.55, 173.36, 170.64, 166.22, 148.35, 138.23, 137.35, 135.41, 132.95, 131.99, 131.95, 128.62, 128.55, 128.08, 128.00, 127.77, 127.74, 127.58, 127.55, 127.40, 127.25, 126.74, 125.12, 111.86, 81.46, 68.61, 58.07, 53.91, 53.70, 48.09, 45.14, 39.10, 36.99, 36.91, 36.13, 36.05, 30.45, 30.33, 29.69, 26.63, 26.53, 26.30, 26.25, 26.19, 25.17, 25.01, 22.09, 22.02, 13.22.

HRMS *m/z* calculated for C<sub>72</sub>H<sub>99</sub>N<sub>14</sub>O<sub>8</sub> [M+H]<sup>+</sup>: 1287.7765; found: 1287.7796.



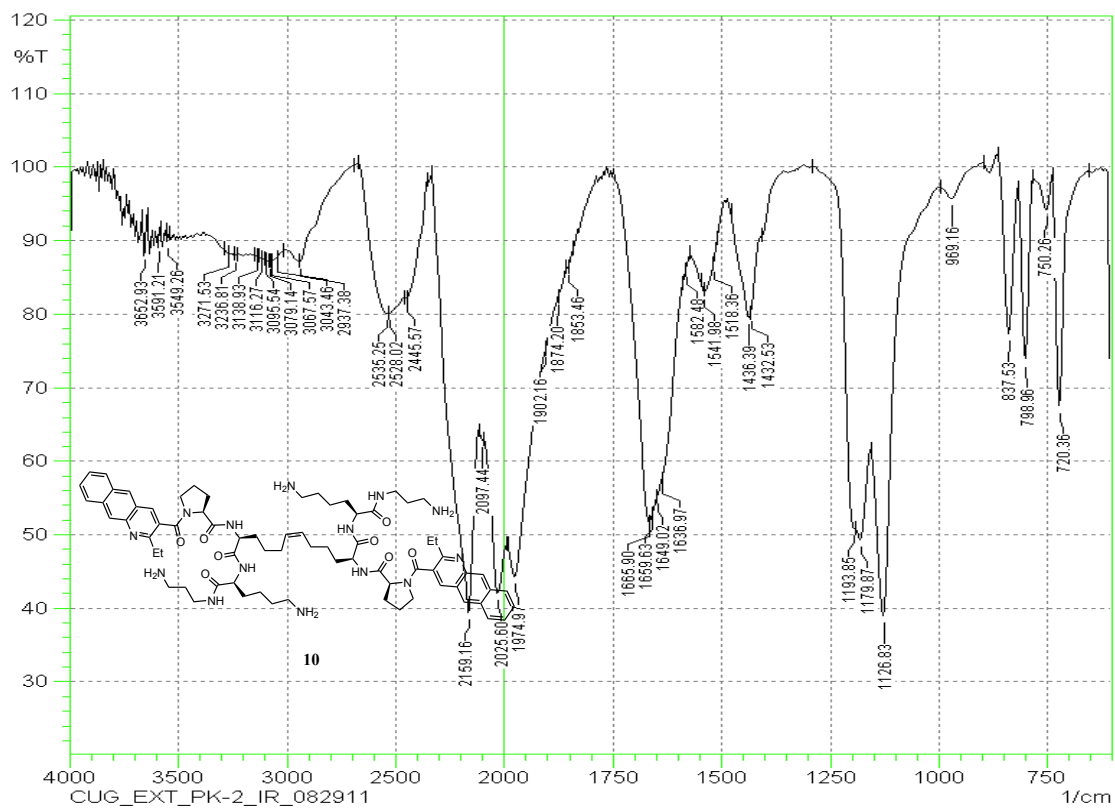

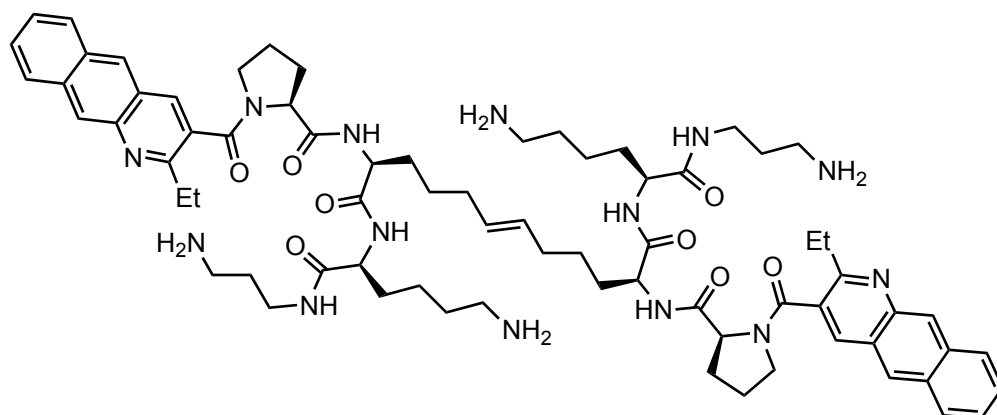

### 11

FTIR (neat): 3686.2, 3229.1, 2936.9, 2530.91, 2517.41, 2161.09, 2023.19, 1974.49, 1661.08, 1545.84, 1435.42, 1187.1, 1128.28, 968.68, 835.6, 798.47, 752.19, 716.99, and 535.21.

$^1\text{H}$  NMR (500 MHz,  $\text{D}_2\text{O}$ ) 8.74 (s, 1H), 8.16 (s, 1H), 8.07 (s, 1H), 7.85 – 7.68 (m, 3H), 7.61 (d,  $J = 6.3$  Hz, 1H), 7.53 (s, 1H), 7.49 (s, 1H), 7.42 (s, 1H), 7.22 (s, 1H), 7.16 (s, 1H), 5.62 – 5.52 (m, 1H), 4.42 (d,  $J = 9.4$  Hz, 1H), 4.28 – 4.17 (m, 2H), 4.09 (s, 1H), 4.01 (s, 1H), 3.83 (s, 3H), 3.59 (d,  $J = 11.8$  Hz, 2H), 3.34 – 3.23 (m, 4H), 3.17 (dd,  $J = 15.6, 8.7$  Hz, 6H), 3.01 – 2.81 (m, 14H), 2.49 (s, 1H), 2.43 – 2.35 (m, 1H), 2.04 (dd,  $J = 28.9, 23.3$  Hz, 9H), 1.84 (d,  $J = 7.7$  Hz, 7H), 1.80 – 1.70 (m, 9H), 1.70 – 1.50 (m, 16H), 1.49 – 1.41 (m, 6H), 1.39 – 1.32 (m, 5H).

$^{13}\text{C}$  NMR (126 MHz,  $\text{D}_2\text{O}$ )  $\delta$ : 173.95, 173.88, 173.65, 173.35, 165.63, 161.90, 144.57, 143.46, 139.15, 135.95, 135.09, 134.57, 131.81, 130.55, 129.34, 128.98, 128.19, 127.66, 125.74, 122.35, 76.32, 60.70, 60.32, 53.92, 53.72, 53.59, 53.23, 50.31, 48.02, 39.10, 39.04, 36.99, 36.90, 36.13, 36.03, 31.03, 30.44, 30.30, 29.90, 29.78, 26.63, 26.54, 26.29, 26.25, 26.17, 25.05, 24.54, 22.62, 22.11, 22.00, 13.57, 13.27, 13.11.

HRMS  $m/z$  calculated for  $\text{C}_{72}\text{H}_{99}\text{N}_{14}\text{O}_8$   $[\text{M}+\text{H}]^+$ : 1287.7765; found  $[\text{M}+\text{Na}]^+$ : 1309.7548.

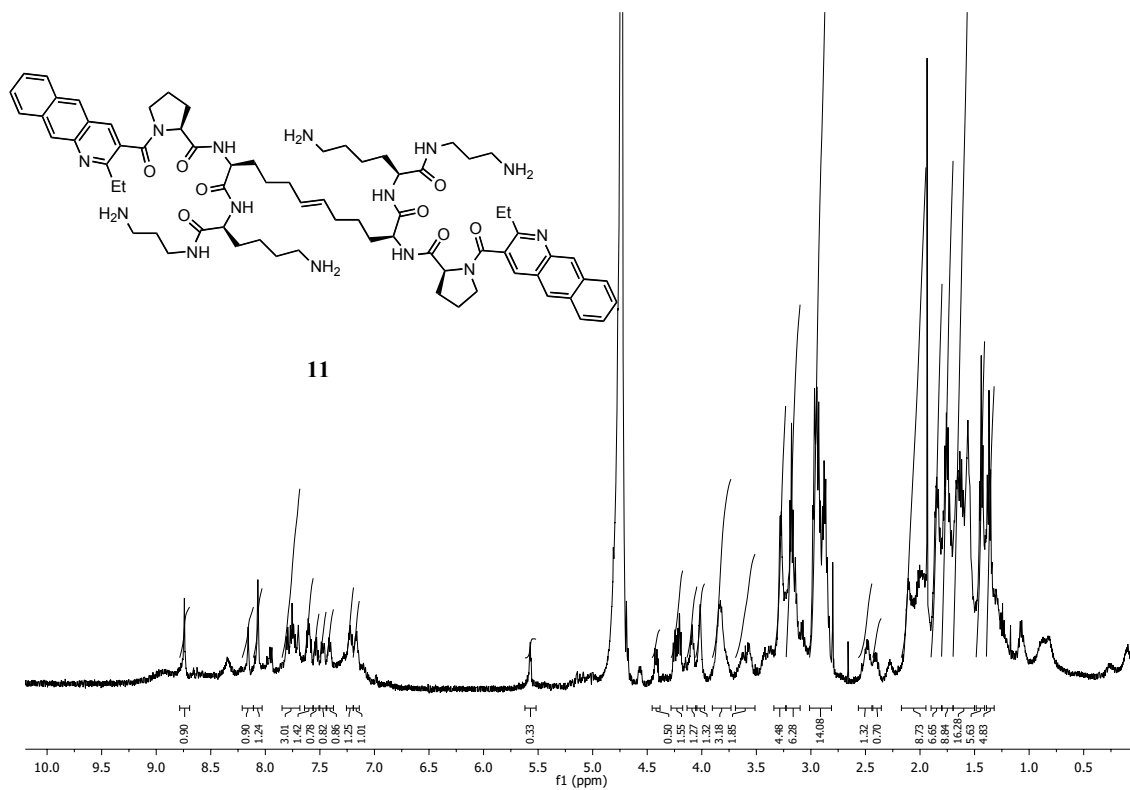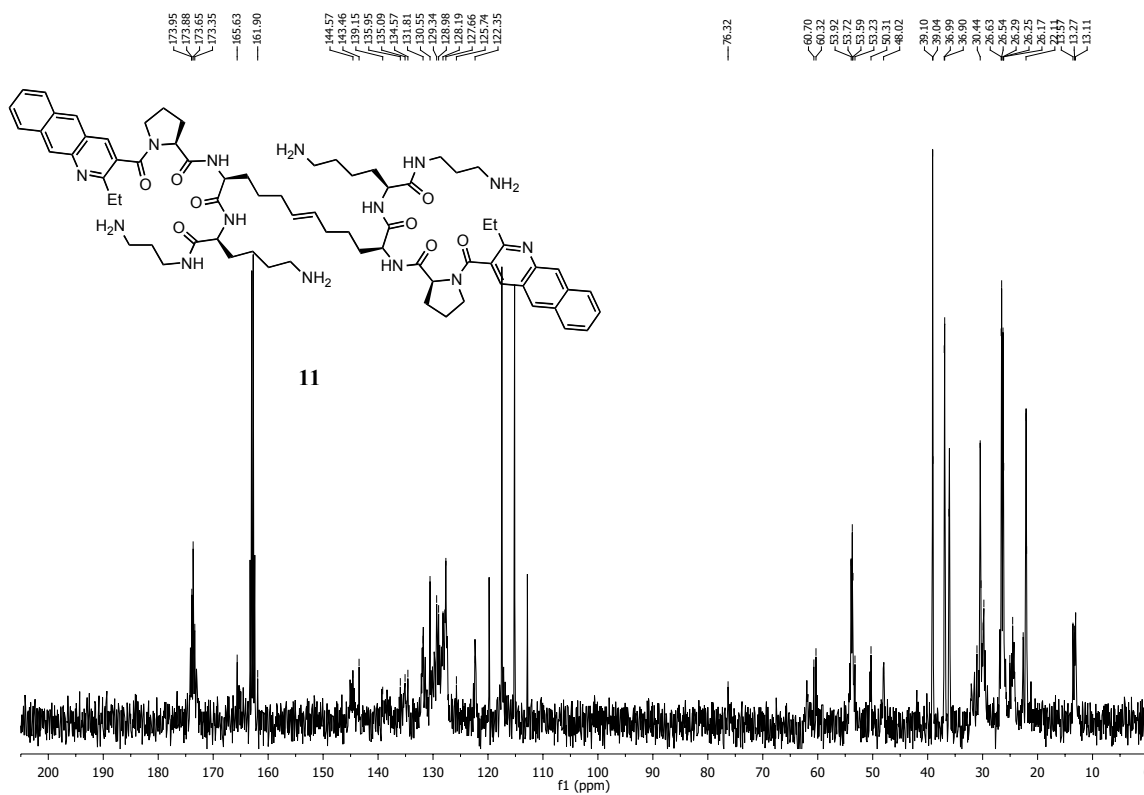

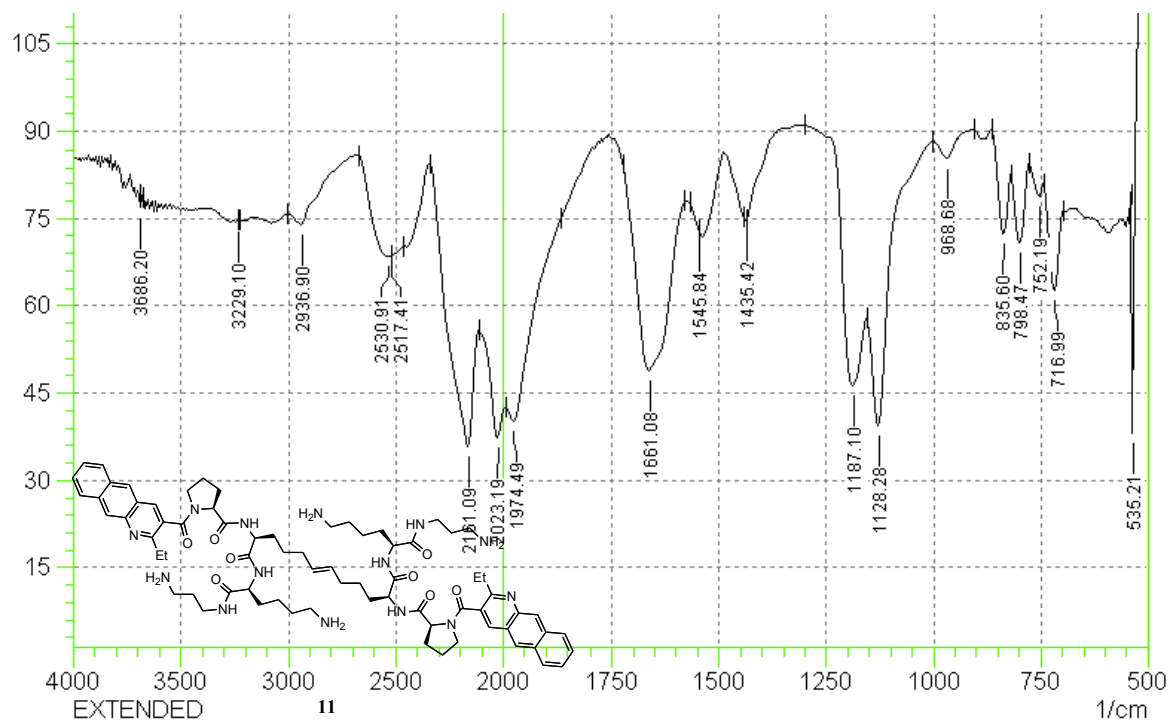

**Binding Analyses by Surface Plasmon Resonance (SPR)**

SPR binding measurements were performed on a Biacore-X instrument (Biacore, Inc., Uppsala, Sweden) with two flow channels (FC1 and FC2). 5'-Biotinylated-RNA sequences, with a C<sub>6</sub> linker separating the biotin label from the RNA (Integrated DNA Technologies Inc.), were immobilized on streptavidin (Rockland Immunochemicals) functionalized carboxyl methyl dextran coated sensor chips (CM5, G.E. Healthcare) using EDC/NHS (Advanced ChemTech) coupling chemistry. Filtered (0.2 μ), degassed and autoclaved HBS-N buffer (0.01M Hepes, pH=7.4, 0.15 M NaCl) was employed as sample and as running buffer for all SPR experiments. A typical protocol for an experiment is as follows: a CM5 sensor chip was allowed to equilibrate to room temperature and then docked into the instrument. Following priming with running buffer, FC1 and FC2 were conditioned by manual injection of 20 μL aqueous NaOH (50 mM) at a flow rate of 30 μL/min. This was repeated 3 times followed by a wash command. Next the carboxyl groups on the sensor chip surface in both flow cells were activated separately by injecting 60 μL of freshly prepared 1:1 mixture of EDC (0.4 M) and NHS (0.1 M) at a 5 μL/min flow rate followed by a wash. Streptavidin (100 μg/mL in 10 mM sodium acetate buffer, pH=5.0) was immediately injected in pulses until approximately between 2500-3000 RU was achieved in both flow cells. After washing, the surface was deactivated with 60 μL injection of ethanolamine (1M, pH=8.5) at 5 μL/min. The flow cells were primed, and the streptavidin surface in FC1 alone was blocked with 30 μL of biotin (20 μM in HBS-N) at 5 μL/min. The RNA (200 nM in running buffer, HBS-N) to be immobilized was unfolded by heating above its predicted melting temperature in a heated block for 2 min and then allowed to refold by cooling gradually to room temperature. The RNA was then immobilized in FC2 alone to response units ranging from 200-1000 RU using a 5 μL/min flow rate. A representative sensorgram for the immobilization procedure is shown in **supplementary Fig. 1**. Two 20 μL aliquots of NaCl (0.5 M) were injected at a 30 μL/min flow rate to remove non-specifically bound RNA. The level of RNA immobilized was noted when the baseline was stable, usually after repeated buffer injection followed by a "prime" command. Binding measurements were performed by flowing various concentrations of the compounds to be analyzed over the immobilized RNA and recording the reference-subtracted (FC2-FC1) sensorgrams.



For kinetic analysis, at least five sensorgrams corresponding to different concentrations of compound (usually ranging from 0.05-1  $\mu\text{M}$  in HBS-N) were obtained using flow rates of either 60  $\mu\text{L}/\text{min}$  or 30  $\mu\text{L}/\text{min}$ . The experimental sensorgrams were globally fitted to a 1:1 binding equation (Biaevaluation software) to obtain association rates ( $k_a$ ) and dissociation rates ( $k_d$ ) as well as equilibrium binding constants ( $K_D$ ). To measure the binding stoichiometry ( $n$ ), the relations in equations (1-3) below were used:

$$RU_{\max} = \frac{MW_{\text{compound}}}{MW_{\text{RNA}}} \times RU_{\text{RNA}} \times \text{Stoichiometry}(n) \quad (1)$$

$$RU_{(\max)\text{predict}} = n \times RU_{(\max)\text{observed}} \quad (2)$$

$$r = \frac{RU_{\text{eq}}}{RU_{\max}} \quad (3)$$

where  $RU_{\max}$  is the maximum resonance response unit at saturation,  $RU_{\text{RNA}}$  is the amount RU of RNA immobilized,  $n$  is the stoichiometry,  $MW_{\text{compound}}$  and  $MW_{\text{RNA}}$  are molecular weights of compound and RNA respectively, and  $RU_{\text{eq}}$  represents the resonance response at steady-state (equilibrium). The response units at equilibrium were subjected to Scatchard binding plots of ( $r/C_{\text{free}}$  vs.  $r$ ).

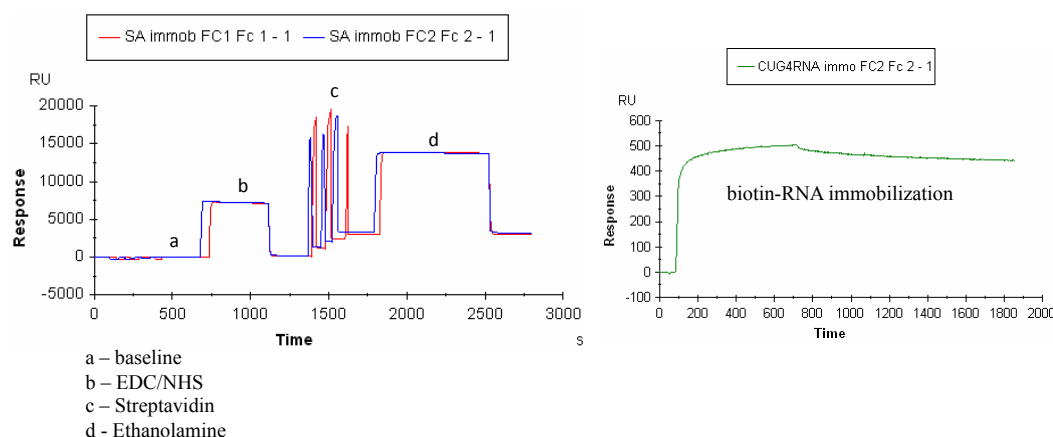

**Supplementary Fig. 1.** Left: representative sensorgrams for streptavidin immobilization on CM5 sensor chip. Right: sensorgram for non-covalent biotin-RNA capture on a streptavidin coated CM5 sensor surface.

**Supplementary Table 1**

| compound 3                                                                         | RNA SEQUENCE                                                                                                                                                                                                                                                                                                                                                                                                                                            |
|------------------------------------------------------------------------------------|---------------------------------------------------------------------------------------------------------------------------------------------------------------------------------------------------------------------------------------------------------------------------------------------------------------------------------------------------------------------------------------------------------------------------------------------------------|
| 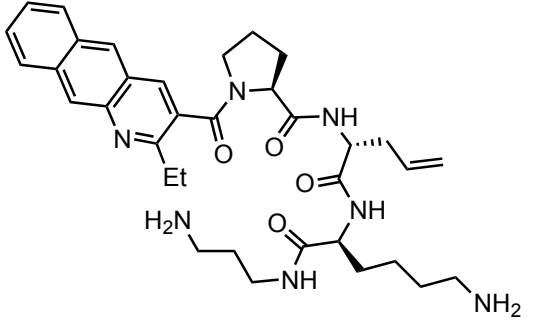  | <p style="text-align: center;">                     G-C<br/>                     U U<br/>                     C-G<br/>                     G-C<br/>                     ( U U )<sub>4</sub><br/>                     C-G<br/>                     C-G<br/>                     G-C<br/>                     C-G<br/>                     C-G-3'<br/>                     C<br/>                     5'<br/>                     (CUG)<sub>10</sub> </p> |
|  |                                                                                                                                                                                                                                                                                                                                                                                                                                                         |
| $K_a$ ( $M^{-1}s^{-1}$ )                                                           | -                                                                                                                                                                                                                                                                                                                                                                                                                                                       |
| $k_d$ ( $s^{-1}$ )                                                                 | -                                                                                                                                                                                                                                                                                                                                                                                                                                                       |
| $K_D$ (nM)                                                                         | No Binding observed                                                                                                                                                                                                                                                                                                                                                                                                                                     |
| $\chi^2$                                                                           | -                                                                                                                                                                                                                                                                                                                                                                                                                                                       |

Supplementary Table 2

| compound 4                                                                                  | RNA SEQUENCE                                                                                                                                                    |
|---------------------------------------------------------------------------------------------|-----------------------------------------------------------------------------------------------------------------------------------------------------------------|
| 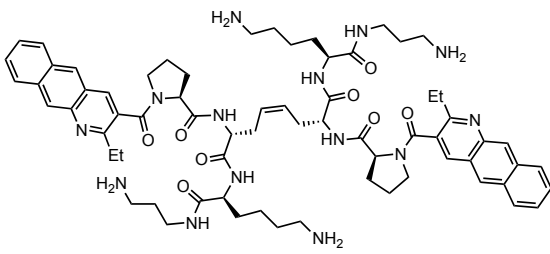           | <p>G-C<br/> U U<br/> C-G<br/> G-C<br/> { U U }<sub>4</sub><br/> C-G<br/> C-G<br/> G-C<br/> C-G<br/> C-G-3'<br/> C<br/> 5'</p> <p>(CUG)<sub>10</sub></p>         |
|          |                                                                                                                                                                 |
|         |                                                                                                                                                                 |
| <p style="text-align: center;">Trial-1 <span style="margin-left: 200px;">Trial-2</span></p> |                                                                                                                                                                 |
| $k_a$ ( $M^{-1}s^{-1}$ )                                                                    | <p style="text-align: center;"><math>(3.6 \pm 0.7) \times 10^4</math> <span style="margin-left: 100px;"><math>(2.6 \pm 0.3) \times 10^4</math></span></p>       |
| $k_d$ ( $s^{-1}$ )                                                                          | <p style="text-align: center;"><math>(1.4 \pm 0.1) \times 10^{-3}</math> <span style="margin-left: 100px;"><math>(1.0 \pm 0.6) \times 10^{-3}</math></span></p> |
| $K_D$ (nM)                                                                                  | <p style="text-align: center;">38 <span style="margin-left: 100px;">40</span></p>                                                                               |
| $\chi^2$                                                                                    | <p style="text-align: center;">0.9 <span style="margin-left: 100px;">1.0</span></p>                                                                             |
| n                                                                                           | 10                                                                                                                                                              |

**Supplementary Table 3**

| compound 4                                                                           | RNA SEQUENCE                                                                                                                                                                                                                               |                                |
|--------------------------------------------------------------------------------------|--------------------------------------------------------------------------------------------------------------------------------------------------------------------------------------------------------------------------------------------|--------------------------------|
| 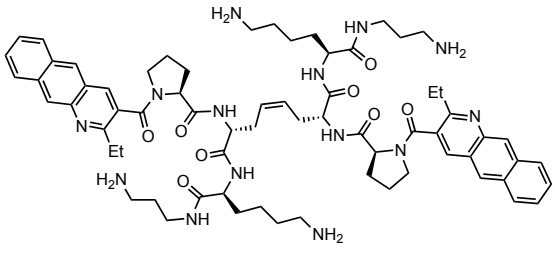    | <p>G-C<br/> <b>U</b> U<br/>           C-G<br/>           G-C<br/> <b>U</b> U<br/>           C-G<br/>           C-G<br/>           G-C<br/>           C-G<br/>           C-G-3'<br/>           C<br/>           5'</p> <p><b>(CUG)4</b></p> |                                |
|   |                                                                                                                                                                                                                                            |                                |
|  |                                                                                                                                                                                                                                            |                                |
| Trial-1                                                                              |                                                                                                                                                                                                                                            | Trial-2                        |
| $k_a$ ( $M^{-1}s^{-1}$ )                                                             | $(2.5 \pm 0.7) \times 10^4$                                                                                                                                                                                                                | $(1.4 \pm 0.2) \times 10^4$    |
| $k_d$ ( $s^{-1}$ )                                                                   | $(4.8 \pm 0.6) \times 10^{-4}$                                                                                                                                                                                                             | $(3.6 \pm 0.1) \times 10^{-4}$ |
| $K_D$ (nM)                                                                           | 19                                                                                                                                                                                                                                         | 26                             |
| $\chi^2$                                                                             | 5.1                                                                                                                                                                                                                                        | 6.1                            |
| n                                                                                    | 4                                                                                                                                                                                                                                          |                                |

**Supplementary Table 4**

| compound 4                                                                                                                                                                | RNA SEQUENCE                                                                                                                                                                                                                  |                                |
|---------------------------------------------------------------------------------------------------------------------------------------------------------------------------|-------------------------------------------------------------------------------------------------------------------------------------------------------------------------------------------------------------------------------|--------------------------------|
| 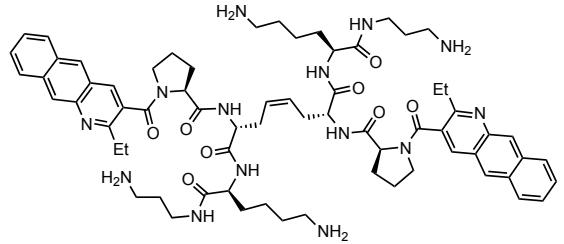                                                                                         | <p>G-C<br/> <b>U U</b><br/>                     C-G<br/>                     G-C<br/>                     C-G<br/>                     C-G-3'<br/>                     C<br/>                     5'</p> <p><b>(CUG)2</b></p> |                                |
|                                                                                        |                                                                                                                                                                                                                               |                                |
|   |                                                                                                                                                                                                                               |                                |
|                                                                                                                                                                           | Trial-1                                                                                                                                                                                                                       | Trial-2                        |
| $k_a$ ( $M^{-1}s^{-1}$ )                                                                                                                                                  | $(3.1 \pm 0.4) \times 10^4$                                                                                                                                                                                                   | $(2.5 \pm 0.6) \times 10^4$    |
| $k_d$ ( $s^{-1}$ )                                                                                                                                                        | $(1.3 \pm 0.8) \times 10^{-3}$                                                                                                                                                                                                | $(5.3 \pm 0.2) \times 10^{-4}$ |
| $K_D$ (nM)                                                                                                                                                                | 43                                                                                                                                                                                                                            | 21                             |
| $\chi^2$                                                                                                                                                                  | 1.9                                                                                                                                                                                                                           | 1.2                            |
| n                                                                                                                                                                         | 2                                                                                                                                                                                                                             |                                |

**Supplementary Table 5**

| compound 4                                                                          | RNA SEQUENCE                                                                                                                                                                                                                                                                               |                                |
|-------------------------------------------------------------------------------------|--------------------------------------------------------------------------------------------------------------------------------------------------------------------------------------------------------------------------------------------------------------------------------------------|--------------------------------|
| 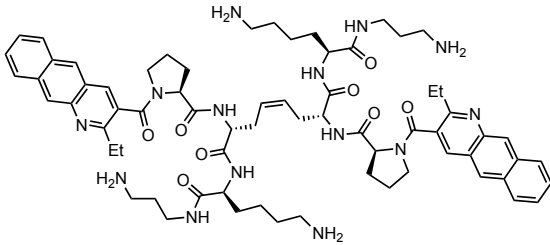   | <pre>           GC                       U  C                          C  U                          (  CG            U  GC            C  U            )  4           CG           CG           GC           CG           CG3'           C           5'            (CCUG)10         </pre> |                                |
|  |                                                                                                                                                                                                                                                                                            |                                |
|  |                                                                                                                                                                                                        |                                |
| Trial-1                                                                             |                                                                                                                                                                                                                                                                                            | Trial-2                        |
| $k_a$ ( $M^{-1}s^{-1}$ )                                                            | $(2.0 \pm 0.2) \times 10^4$                                                                                                                                                                                                                                                                | $(2.8 \pm 0.4) \times 10^4$    |
| $k_d$ ( $s^{-1}$ )                                                                  | $(7.6 \pm 0.8) \times 10^{-4}$                                                                                                                                                                                                                                                             | $(1.1 \pm 0.4) \times 10^{-3}$ |
| $K_D$ (nM)                                                                          | 38                                                                                                                                                                                                                                                                                         | 38                             |
| $\chi^2$                                                                            | 2.5                                                                                                                                                                                                                                                                                        | 1.4                            |
| n                                                                                   | 10                                                                                                                                                                                                                                                                                         |                                |

Supplementary Table 6

| compound 4                                                                           | RNA SEQUENCE                                                                                                                                                                                                                                                                                                                                                                                                                         |                                |
|--------------------------------------------------------------------------------------|--------------------------------------------------------------------------------------------------------------------------------------------------------------------------------------------------------------------------------------------------------------------------------------------------------------------------------------------------------------------------------------------------------------------------------------|--------------------------------|
| 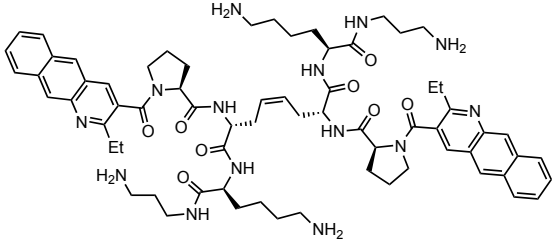    | <p style="text-align: center;">                     G-C<br/>                     A A<br/>                     C-G<br/>                     G-C<br/>                     ( A A )<br/>                     C-G<br/>                     C-G<br/>                     G-C<br/>                     C-G<br/>                     C-G-3'<br/>                     C<br/>                     5'<br/> <br/> <b>(CAG)<sup>10</sup></b> </p> |                                |
|   |                                                                                                                                                                                                                                                                                                                                                                                                                                      |                                |
|  |                                                                                                                                                                                                                                                                                                                                                                                                                                      |                                |
| Trial-1                                                                              |                                                                                                                                                                                                                                                                                                                                                                                                                                      | Trial-2                        |
| $k_a$ ( $M^{-1}s^{-1}$ )                                                             | $(3.1 \pm 0.5) \times 10^4$                                                                                                                                                                                                                                                                                                                                                                                                          | $(3.1 \pm 0.3) \times 10^4$    |
| $k_d$ ( $s^{-1}$ )                                                                   | $(1.6 \pm 0.1) \times 10^{-3}$                                                                                                                                                                                                                                                                                                                                                                                                       | $(1.4 \pm 0.1) \times 10^{-3}$ |
| $K_D$ (nM)                                                                           | 46                                                                                                                                                                                                                                                                                                                                                                                                                                   | 52                             |
| $\chi^2$                                                                             | 1.4                                                                                                                                                                                                                                                                                                                                                                                                                                  | 1.3                            |
| n                                                                                    | 10                                                                                                                                                                                                                                                                                                                                                                                                                                   |                                |

Supplementary Table 7

| compound 4                                                                          | RNA SEQUENCE                                                                                                                                                                                                                                                                                                                                                         |                                |
|-------------------------------------------------------------------------------------|----------------------------------------------------------------------------------------------------------------------------------------------------------------------------------------------------------------------------------------------------------------------------------------------------------------------------------------------------------------------|--------------------------------|
| 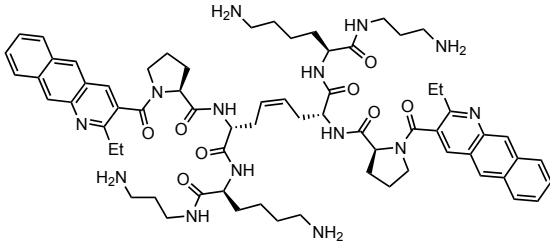   | <p>G-C<br/>                     U-A<br/>                     C-G<br/>                     (G-C)<br/>                     (U-A)<br/>                     (C-G)<br/>                     C-G<br/>                     G-C<br/>                     C-G<br/>                     C-G-3'<br/>                     C<br/>                     5'</p> <p><b>Duplex</b></p> |                                |
|  |                                                                                                                                                                                                                                                                                                                                                                      |                                |
| Trial-1                                                                             |                                                                                                                                                                                                                                                                                                                                                                      | Trial-2                        |
| $k_a$ ( $M^{-1}s^{-1}$ )                                                            | $(1.5 \pm 0.3) \times 10^4$                                                                                                                                                                                                                                                                                                                                          | $(1.4 \pm 0.1) \times 10^4$    |
| $k_d$ ( $s^{-1}$ )                                                                  | $(8.3 \pm 0.5) \times 10^{-4}$                                                                                                                                                                                                                                                                                                                                       | $(9.0 \pm 0.0) \times 10^{-4}$ |
| $K_D$ (nM)                                                                          | 56                                                                                                                                                                                                                                                                                                                                                                   | 78                             |
| $\chi^2$                                                                            | 1.8                                                                                                                                                                                                                                                                                                                                                                  | 1.2                            |
| n                                                                                   | ND                                                                                                                                                                                                                                                                                                                                                                   |                                |



**Supplementary Table 8**

| compound 4                                                                         | RNA SEQUENCE                                                                                                                |                                  |
|------------------------------------------------------------------------------------|-----------------------------------------------------------------------------------------------------------------------------|----------------------------------|
| 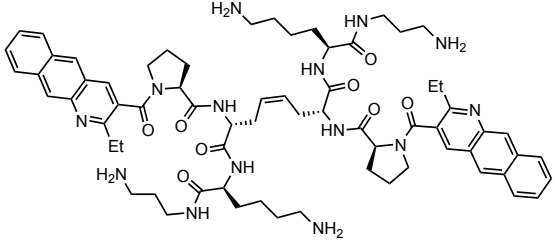  | <p>C-A<br/>A A<br/>C-G<br/>C-G<br/>C-G<br/>U-A<br/>U-A<br/>C-G<br/>C-G<br/>G-C<br/>G-C 3'<br/>5'</p> <p><b>HIV-1FSS</b></p> |                                  |
|  |                                                                                                                             |                                  |
|                                                                                    | Trial-1                                                                                                                     | Trial-2                          |
| $k_a$ ( $M^{-1}s^{-1}$ )                                                           | $(1.3 \pm 0.2) \times 10^4$                                                                                                 | $(4.2 \pm 0.1) \times 10^3$      |
| $k_d$ ( $s^{-1}$ )                                                                 | $(1.5 \pm 0.1) \times 10^{-2}$                                                                                              | $(5.60 \pm 0.09) \times 10^{-3}$ |
| $K_D$ (nM)                                                                         | 1140                                                                                                                        | 1340                             |
| $\chi^2$                                                                           | 3.5                                                                                                                         | 1.6                              |
| n                                                                                  | ND                                                                                                                          |                                  |

Supplementary Table 9

| COMPOUND 5                                                                                                                                                                                                                                                                                                                             | RNA SEQUENCE                                                                                                                                                                                                                                                                                                                               |
|----------------------------------------------------------------------------------------------------------------------------------------------------------------------------------------------------------------------------------------------------------------------------------------------------------------------------------------|--------------------------------------------------------------------------------------------------------------------------------------------------------------------------------------------------------------------------------------------------------------------------------------------------------------------------------------------|
| 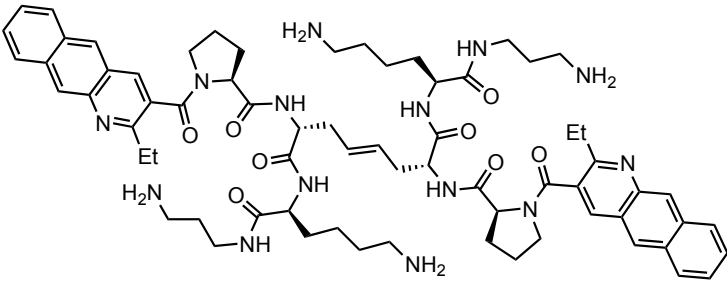                                                                                                                                                                                                                                                      | <p>G-C<br/> U U<br/> C-G<br/> G-C<br/> (CUGU)<sub>4</sub><br/> C-G<br/> C-G<br/> G-C<br/> C-G<br/> C-G-3'<br/> C<br/> 5'</p> <p><b>(CUG)10</b></p>                                                                                                                                                                                         |
|                                                                                                                                                                                                                                                     |                                                                                                                                                                                                                                                                                                                                            |
|                                                                                                                                                                                                                                                     |                                                                                                                                                                                                                                                        |
| <p style="text-align: center;">Trial-1</p> <p><math>k_a</math> (<math>M^{-1}s^{-1}</math>)      <math>(2.9 \pm 0.4) \times 10^4</math><br/> <math>k_d</math> (<math>s^{-1}</math>)          <math>(1.4 \pm 0.3) \times 10^{-3}</math><br/> <math>K_D</math> (nM)              48<br/> <math>\chi^2</math>                      1.7</p> | <p style="text-align: center;">Trial-2</p> <p><math>k_a</math> (<math>M^{-1}s^{-1}</math>)      <math>(2.80 \pm 0.03) \times 10^4</math><br/> <math>k_d</math> (<math>s^{-1}</math>)          <math>(1.47 \pm 0.01) \times 10^{-3}</math><br/> <math>K_D</math> (nM)              88<br/> <math>\chi^2</math>                      1.1</p> |
| <p>n</p>                                                                                                                                                                                                                                                                                                                               | <p>10</p>                                                                                                                                                                                                                                                                                                                                  |

Supplementary Table 10

| compound 5                                                                          | RNA SEQUENCE                                                                                                                                                                                                                                                                                                                         |                                |
|-------------------------------------------------------------------------------------|--------------------------------------------------------------------------------------------------------------------------------------------------------------------------------------------------------------------------------------------------------------------------------------------------------------------------------------|--------------------------------|
| 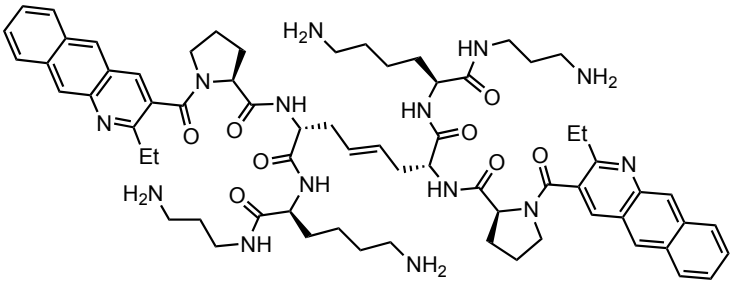   | <p>G-C<br/> <b>U U</b><br/>                     C-G<br/>                     G-C<br/> <b>U U</b><br/>                     C-G<br/>                     C-G<br/>                     G-C<br/>                     C-G<br/>                     C-G-3'<br/>                     C<br/>                     5'</p> <p><b>(CUG)4</b></p> |                                |
|  |                                                                                                                                                                                                                                                                                                                                      |                                |
| Trial-1                                                                             |                                                                                                                                                                                                                                                                                                                                      | Trial-2                        |
| $k_a$ ( $M^{-1}s^{-1}$ )                                                            | $(3.5 \pm 0.4) \times 10^4$                                                                                                                                                                                                                                                                                                          | $(2.2 \pm 0.3) \times 10^4$    |
| $k_d$ ( $s^{-1}$ )                                                                  | $(9.7 \pm 0.7) \times 10^{-4}$                                                                                                                                                                                                                                                                                                       | $(1.0 \pm 0.5) \times 10^{-3}$ |
| $K_D$ (nM)                                                                          | 28                                                                                                                                                                                                                                                                                                                                   | 48                             |
| Chi <sup>2</sup>                                                                    | 2                                                                                                                                                                                                                                                                                                                                    | 2                              |
| n                                                                                   | ND                                                                                                                                                                                                                                                                                                                                   |                                |

Supplementary Table 11

| compound <b>5</b>                                                                    | RNA SEQUENCE                                                                                                                                                                                                                                                                                                                                                                                    |                                |
|--------------------------------------------------------------------------------------|-------------------------------------------------------------------------------------------------------------------------------------------------------------------------------------------------------------------------------------------------------------------------------------------------------------------------------------------------------------------------------------------------|--------------------------------|
| 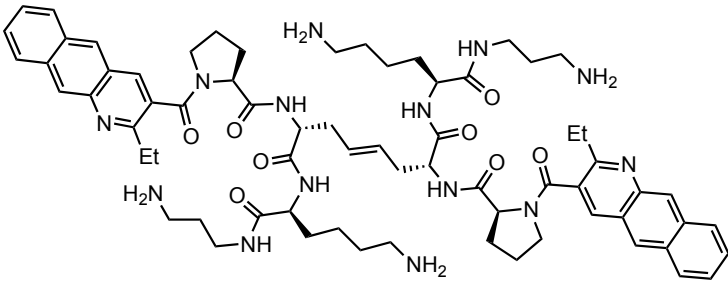    | <p style="text-align: center;">                     GC<br/> <span style="color: red;">U</span> <span style="color: red;">U</span><br/>                     C-G<br/>                     GC<br/>                     C-G<br/>                     C-G-3'<br/>                     C<br/>                     5'                 </p> <p style="text-align: center;"><b>(CUG)<sub>2</sub></b></p> |                                |
|   |                                                                                                                                                                                                                                                                                                                                                                                                 |                                |
|  |                                                                                                                                                                                                                                                                                                                                                                                                 |                                |
| Trial-1                                                                              |                                                                                                                                                                                                                                                                                                                                                                                                 | Trial-2                        |
| $k_a$ ( $M^{-1}s^{-1}$ )                                                             | $(3.1 \pm 0.6) \times 10^4$                                                                                                                                                                                                                                                                                                                                                                     | $(5.4 \pm 0.1) \times 10^4$    |
| $k_d$ ( $s^{-1}$ )                                                                   | $(1.0 \pm 0.1) \times 10^{-3}$                                                                                                                                                                                                                                                                                                                                                                  | $(5.6 \pm 0.9) \times 10^{-4}$ |
| $K_D$ (nM)                                                                           | 33                                                                                                                                                                                                                                                                                                                                                                                              | 10                             |
| $\chi^2$                                                                             | 1.3                                                                                                                                                                                                                                                                                                                                                                                             | 1.0                            |
| n                                                                                    | $\geq 1.2$                                                                                                                                                                                                                                                                                                                                                                                      |                                |

**Supplementary Table 12**

| compound <b>5</b>                                                                   | RNA SEQUENCE                                                                                                                                                                                                                                                                                                                                                                                                               |                                |
|-------------------------------------------------------------------------------------|----------------------------------------------------------------------------------------------------------------------------------------------------------------------------------------------------------------------------------------------------------------------------------------------------------------------------------------------------------------------------------------------------------------------------|--------------------------------|
| 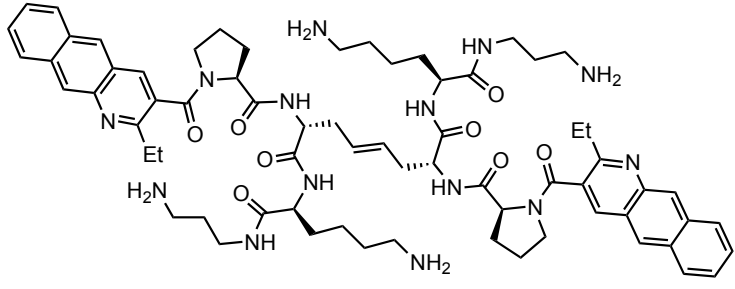   | <p style="text-align: center;"> <math display="block">\left( \begin{array}{c} \text{GC} \\ \text{U} \quad \text{C} \\ \text{C} \quad \text{U} \\ \text{CG} \\ \text{GC} \\ \text{U} \quad \text{C} \\ \text{C} \quad \text{U} \\ \text{CG} \\ \text{CG} \\ \text{GC} \\ \text{CG} \\ \text{CG-3'} \\ \text{C} \\ \text{5'} \end{array} \right)_4</math> </p> <p style="text-align: center;"><b>(CCUG)<sub>10</sub></b></p> |                                |
|  |                                                                                                                                                                                                                                                                                                                                                                                                                            |                                |
|                                                                                     | Trial-1                                                                                                                                                                                                                                                                                                                                                                                                                    | Trial-2                        |
| $k_a$ ( $\text{M}^{-1}\text{s}^{-1}$ )                                              | $(2.9 \pm 0.4) \times 10^4$                                                                                                                                                                                                                                                                                                                                                                                                | $(4.1 \pm 0.6) \times 10^4$    |
| $k_d$ ( $\text{s}^{-1}$ )                                                           | $(4.9 \pm 0.2) \times 10^{-4}$                                                                                                                                                                                                                                                                                                                                                                                             | $(5.5 \pm 0.7) \times 10^{-3}$ |
| $K_D$ (nM)                                                                          | 17                                                                                                                                                                                                                                                                                                                                                                                                                         | 13                             |
| $\text{Chi}^2$                                                                      | 1.5                                                                                                                                                                                                                                                                                                                                                                                                                        | 1.1                            |
| n                                                                                   | ND                                                                                                                                                                                                                                                                                                                                                                                                                         |                                |

Supplementary Table 13

| compound 5                                                                                  | RNA SEQUENCE                                                                                                                                   |
|---------------------------------------------------------------------------------------------|------------------------------------------------------------------------------------------------------------------------------------------------|
| 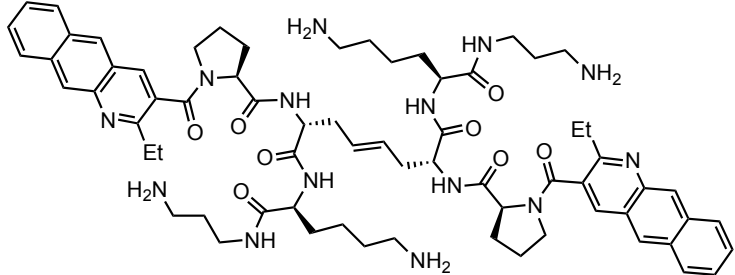           | <p>G-C<br/> A A<br/> C-G<br/> G-C<br/> (A A)<br/> C-G<br/> C-G<br/> C-G<br/> G-C<br/> C-G<br/> C-G-3'<br/> C<br/> 5'</p> <p><b>(CAG)10</b></p> |
|          |                                                                                                                                                |
| <p style="text-align: center;">Trial-1 <span style="margin-left: 200px;">Trial-2</span></p> |                                                                                                                                                |
| $k_a$ ( $M^{-1}s^{-1}$ )                                                                    | $(3.0 \pm 0.7) \times 10^4$                                                                                                                    |
| $k_d$ ( $s^{-1}$ )                                                                          | $(1.4 \pm 0.2) \times 10^{-3}$                                                                                                                 |
| $K_D$ (nM)                                                                                  | 45                                                                                                                                             |
| Chi <sup>2</sup>                                                                            | 1.2                                                                                                                                            |
| n                                                                                           | ND                                                                                                                                             |

**Supplementary Table 14**

| compound <b>5</b>                                                                           | RNA SEQUENCE                                                                                                                                       |                                  |
|---------------------------------------------------------------------------------------------|----------------------------------------------------------------------------------------------------------------------------------------------------|----------------------------------|
| 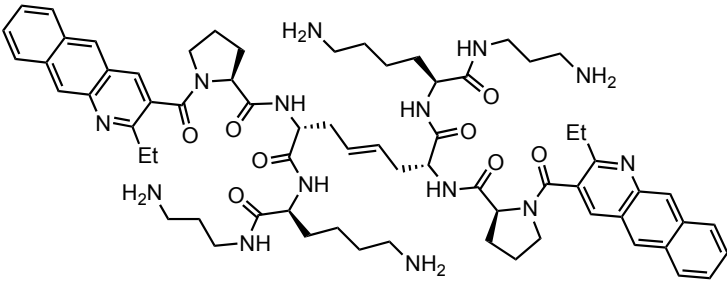           | <p>G-C<br/> U-A<br/> C-G<br/> (G-C)<br/> U-A<br/> (C-G)<sub>4</sub><br/> C-G<br/> G-C<br/> C-G<br/> C-G-3'<br/> C<br/> 5'</p> <p><b>Duplex</b></p> |                                  |
|          |                                                                                                                                                    |                                  |
| <p style="text-align: center;">Trial-1 <span style="margin-left: 150px;">Trial-2</span></p> |                                                                                                                                                    |                                  |
| $k_a$ ( $M^{-1}s^{-1}$ )                                                                    | $(8.62 \pm 0.01) \times 10^{-3}$                                                                                                                   | $(2.13 \pm 0.03) \times 10^{-4}$ |
| $k_d$ ( $s^{-1}$ )                                                                          | $3.68 \pm 0.02 \times 10^{-3}$                                                                                                                     | $(4.00 \pm 0.06) \times 10^{-3}$ |
| $K_D$ (nM)                                                                                  | 427                                                                                                                                                | 188                              |
| $\chi^2$                                                                                    | 2.5                                                                                                                                                | 1.8                              |
| n                                                                                           | ND                                                                                                                                                 |                                  |

**Supplementary Table 15**

| compound <b>5</b>                                                                           | RNA SEQUENCE                                                                                                                                                                                                                                                                                                                                                       |
|---------------------------------------------------------------------------------------------|--------------------------------------------------------------------------------------------------------------------------------------------------------------------------------------------------------------------------------------------------------------------------------------------------------------------------------------------------------------------|
| 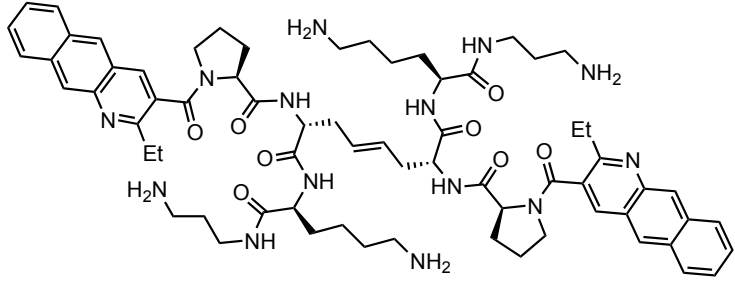           | <p>C-A<br/>                     A A<br/>                     C-G<br/>                     C-G<br/>                     C-G<br/>                     U-A<br/>                     U-A<br/>                     C-G<br/>                     C-G<br/>                     G-C<br/>                     G-C 3'<br/>                     5'</p> <p><b>HIV-1FSS</b></p> |
|          |                                                                                                                                                                                                                                                                                                                                                                    |
| <p style="text-align: center;">Trial-1 <span style="margin-left: 150px;">Trial-2</span></p> |                                                                                                                                                                                                                                                                                                                                                                    |
| $k_a$ ( $M^{-1}s^{-1}$ )                                                                    | <p style="text-align: center;"><math>(5.44 \pm 0.04) \times 10^{-3}</math> <span style="margin-left: 100px;"><math>(4.9 \pm 0.9) \times 10^{-3}</math></span></p>                                                                                                                                                                                                  |
| $k_d$ ( $s^{-1}$ )                                                                          | <p style="text-align: center;"><math>3.93 \pm 0.06 \times 10^{-3}</math> <span style="margin-left: 100px;"><math>(3.92 \pm 0.06) \times 10^{-3}</math></span></p>                                                                                                                                                                                                  |
| $K_D$ (nM)                                                                                  | <p style="text-align: center;">723 <span style="margin-left: 100px;">795</span></p>                                                                                                                                                                                                                                                                                |
| $\chi^2$                                                                                    | <p style="text-align: center;">1.8 <span style="margin-left: 100px;">1.4</span></p>                                                                                                                                                                                                                                                                                |
| n                                                                                           | ND                                                                                                                                                                                                                                                                                                                                                                 |



Supplementary Table 16

| compound 6                                                                           | RNA SEQUENCE                                                                                                                                                                                                                                                                                                                                                                                                                                      |                                  |
|--------------------------------------------------------------------------------------|---------------------------------------------------------------------------------------------------------------------------------------------------------------------------------------------------------------------------------------------------------------------------------------------------------------------------------------------------------------------------------------------------------------------------------------------------|----------------------------------|
| 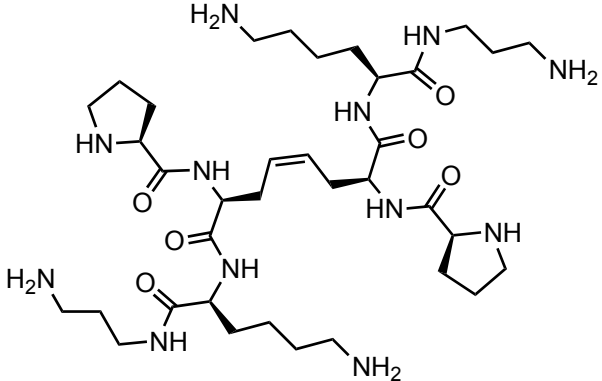    | <p style="text-align: center;">                     G-C<br/>                     U    U<br/>                     C-G<br/>                     G-C<br/>                     ( U    U )<br/>                     C-G<br/>                     C-G<br/>                     G-C<br/>                     C-G<br/>                     C-G-3'<br/>                     C<br/>                     5'<br/>                     (CUG)<sub>10</sub> </p> |                                  |
|   |                                                                                                                                                                                                                                                                                                                                                                                                                                                   |                                  |
|  |                                                                                                                                                                                                                                                                                                                                                                                                                                                   |                                  |
| Trial-1                                                                              |                                                                                                                                                                                                                                                                                                                                                                                                                                                   | Trial-2                          |
| $k_a$ ( $M^{-1}s^{-1}$ )                                                             | $(1.35 \pm 0.03) \times 10^5$                                                                                                                                                                                                                                                                                                                                                                                                                     | $(1.29 \pm 0.03) \times 10^5$    |
| $k_d$ ( $s^{-1}$ )                                                                   | $(3.54 \pm 0.03) \times 10^{-2}$                                                                                                                                                                                                                                                                                                                                                                                                                  | $(3.41 \pm 0.03) \times 10^{-2}$ |
| $K_D$ (nM)                                                                           | 263                                                                                                                                                                                                                                                                                                                                                                                                                                               | 263                              |
| $\chi^2$                                                                             | 2.2                                                                                                                                                                                                                                                                                                                                                                                                                                               | 2.3                              |
| n                                                                                    | $\geq 3$                                                                                                                                                                                                                                                                                                                                                                                                                                          |                                  |

Supplementary Table 17

| compound 6                                                                          | RNA SEQUENCE                                                                                                                                                                                                                                                                                                                                                                                                                                                                                                                       |                                |
|-------------------------------------------------------------------------------------|------------------------------------------------------------------------------------------------------------------------------------------------------------------------------------------------------------------------------------------------------------------------------------------------------------------------------------------------------------------------------------------------------------------------------------------------------------------------------------------------------------------------------------|--------------------------------|
| 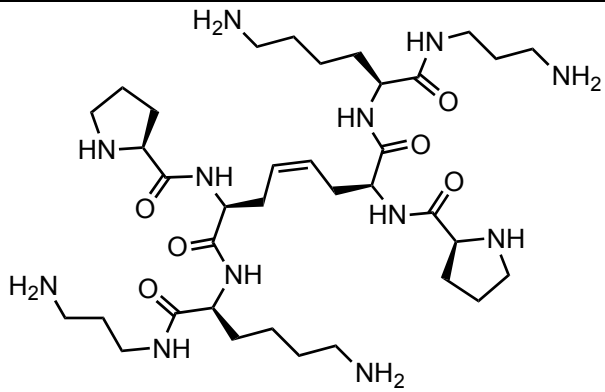   | <p data-bbox="1153 315 1299 630">                     GC<br/>                     U C<br/>                     C U<br/>                     CG<br/>                     GC<br/>                     ( U C )<br/>                     C U<br/>                     CG<br/>                     CG<br/>                     GC<br/>                     CG<br/>                     CG3'<br/>                     C<br/>                     5'                 </p> <p data-bbox="1153 651 1299 682"><b>(CCUG)<sub>10</sub></b></p> |                                |
|  |                                                                                                                                                                                                                                                                                                                                                                                                                                                                                                                                    |                                |
|                                                                                     | Trial-1                                                                                                                                                                                                                                                                                                                                                                                                                                                                                                                            | Trial-2                        |
| $k_a$ ( $M^{-1}s^{-1}$ )                                                            | $(1.6 \pm 0.2) \times 10^4$                                                                                                                                                                                                                                                                                                                                                                                                                                                                                                        | $(1.2 \pm 0.1) \times 10^4$    |
| $k_d$ ( $s^{-1}$ )                                                                  | $(3.5 \pm 0.1) \times 10^{-1}$                                                                                                                                                                                                                                                                                                                                                                                                                                                                                                     | $(2.4 \pm 0.8) \times 10^{-1}$ |
| $K_D$ (nM)                                                                          | 22600                                                                                                                                                                                                                                                                                                                                                                                                                                                                                                                              | 21200                          |
| Chi <sup>2</sup>                                                                    | 1.5                                                                                                                                                                                                                                                                                                                                                                                                                                                                                                                                | 1.5                            |
| n                                                                                   | ND                                                                                                                                                                                                                                                                                                                                                                                                                                                                                                                                 |                                |

Supplementary Table 18

| compound 6                                                                                                                  | RNA SEQUENCE                                                                                                                          |                                  |         |         |
|-----------------------------------------------------------------------------------------------------------------------------|---------------------------------------------------------------------------------------------------------------------------------------|----------------------------------|---------|---------|
| 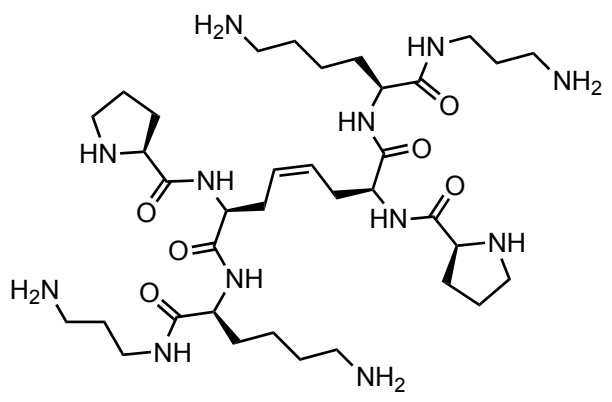                                           | <p>G-C<br/> A A<br/> C-G<br/> G-C<br/> (A A)<br/> C-G<br/> C-G<br/> G-C<br/> C-G<br/> C-G-3'<br/> C<br/> 5'</p> <p><b>(CAG)10</b></p> |                                  |         |         |
|                                          |                                                                                                                                       |                                  |         |         |
| <table border="0" style="width: 100%; text-align: center;"> <tr> <td></td> <td>Trial-1</td> <td>Trial-2</td> </tr> </table> |                                                                                                                                       |                                  | Trial-1 | Trial-2 |
|                                                                                                                             | Trial-1                                                                                                                               | Trial-2                          |         |         |
| $k_a$ ( $M^{-1}s^{-1}$ )                                                                                                    | $(1.35 \pm 0.01) \times 10^5$                                                                                                         | $(1.0 \pm 0.1) \times 10^5$      |         |         |
| $k_d$ ( $s^{-1}$ )                                                                                                          | $(1.96 \pm 0.07) \times 10^{-2}$                                                                                                      | $(1.84 \pm 0.01) \times 10^{-2}$ |         |         |
| $K_D$ (nM)                                                                                                                  | 145                                                                                                                                   | 176                              |         |         |
| Chi <sup>2</sup>                                                                                                            | 4.1                                                                                                                                   | 4.6                              |         |         |
| n                                                                                                                           | ND                                                                                                                                    |                                  |         |         |

Supplementary Table 19

| compound 6                                                                           | RNA SEQUENCE                                                                                                                                         |                                  |
|--------------------------------------------------------------------------------------|------------------------------------------------------------------------------------------------------------------------------------------------------|----------------------------------|
| 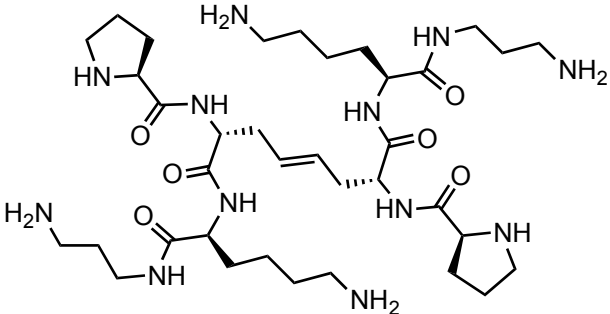    | <p>G-C<br/> U-A<br/> C-G<br/> (G-C)<br/> (U-A)<br/> (C-G)<sub>4</sub><br/> C-G<br/> G-C<br/> C-G<br/> C-G-3'<br/> C<br/> 5'</p> <p><b>Duplex</b></p> |                                  |
|   |                                                                                                                                                      |                                  |
|  |                                                                                                                                                      |                                  |
| Trial-1                                                                              |                                                                                                                                                      | Trial-2                          |
| $k_a$ ( $M^{-1}s^{-1}$ )                                                             | $(1.54 \pm 0.05) \times 10^5$                                                                                                                        | $(1.82 \pm 0.04) \times 10^5$    |
| $k_d$ ( $s^{-1}$ )                                                                   | $(5.01 \pm 0.06) \times 10^{-2}$                                                                                                                     | $(6.32 \pm 0.07) \times 10^{-2}$ |
| $K_D$ (nM)                                                                           | 325                                                                                                                                                  | 348                              |
| Chi <sup>2</sup>                                                                     | 1.4                                                                                                                                                  | 1.5                              |
| n                                                                                    | 2                                                                                                                                                    |                                  |

Supplementary Table 20

| compound 6                                                                          | RNA SEQUENCE                                                                                                                |                                  |
|-------------------------------------------------------------------------------------|-----------------------------------------------------------------------------------------------------------------------------|----------------------------------|
| 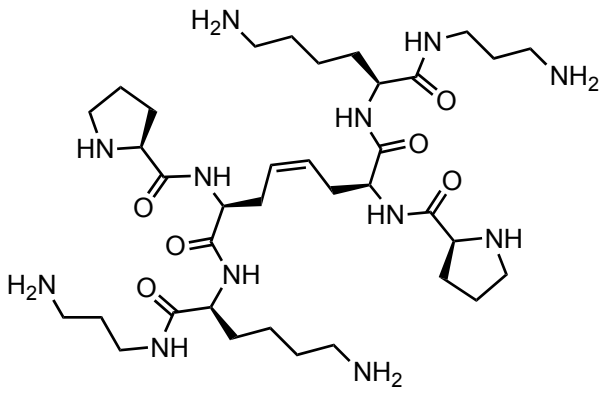   | <p>C-A<br/>A A<br/>C-G<br/>C-G<br/>C-G<br/>U-A<br/>U-A<br/>C-G<br/>C-G<br/>G-C<br/>G-C 3'<br/>5'</p> <p><b>HIV-1FSS</b></p> |                                  |
|  |                                                                                                                             |                                  |
|                                                                                     | Trial-1                                                                                                                     | Trial-2                          |
| $k_a$ ( $M^{-1}s^{-1}$ )                                                            | $(2.29 \pm 0.05) \times 10^5$                                                                                               | $(2.12 \pm 0.04) \times 10^5$    |
| $k_d$ ( $s^{-1}$ )                                                                  | $(2.68 \pm 0.05) \times 10^{-2}$                                                                                            | $(2.45 \pm 0.02) \times 10^{-2}$ |
| $K_D$ (nM)                                                                          | 117                                                                                                                         | 115                              |
| $\chi^2$                                                                            | 2.2                                                                                                                         | 1.6                              |
| n                                                                                   | ND                                                                                                                          |                                  |

**Supplementary Table 21**

| compound 7                                                                                                                                                                                                                                                                                                                                                                                                                                                                                                                                                                                                                                                                                                                                                                                                                                                                                                                                   | RNA SEQUENCE                                                                                                                                                                                                                                                                                                                                                                                                                    |                                  |         |         |                          |                               |                               |                    |                                  |                                  |            |     |     |          |     |     |
|----------------------------------------------------------------------------------------------------------------------------------------------------------------------------------------------------------------------------------------------------------------------------------------------------------------------------------------------------------------------------------------------------------------------------------------------------------------------------------------------------------------------------------------------------------------------------------------------------------------------------------------------------------------------------------------------------------------------------------------------------------------------------------------------------------------------------------------------------------------------------------------------------------------------------------------------|---------------------------------------------------------------------------------------------------------------------------------------------------------------------------------------------------------------------------------------------------------------------------------------------------------------------------------------------------------------------------------------------------------------------------------|----------------------------------|---------|---------|--------------------------|-------------------------------|-------------------------------|--------------------|----------------------------------|----------------------------------|------------|-----|-----|----------|-----|-----|
| 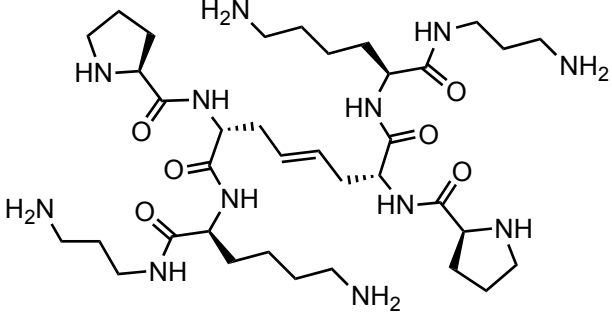                                                                                                                                                                                                                                                                                                                                                                                                                                                                                                                                                                                                                                                                                                                                                                                                                                                            | <p style="text-align: center;">                     G-C<br/>                     U U<br/>                     C-G<br/>                     G-C<br/>                     ( U U )<sub>4</sub><br/>                     C-G<br/>                     C-G<br/>                     G-C<br/>                     C-G<br/>                     C-G-3'<br/>                     C<br/>                     5'<br/> <b>(CUG)10</b> </p> |                                  |         |         |                          |                               |                               |                    |                                  |                                  |            |     |     |          |     |     |
| <p style="text-align: center;">RU</p>  <p style="text-align: center;">Time s</p>                                                                                                                                                                                                                                                                                                                                                                                                                                                                                                                                                                                                                                                                                                                                                                          |                                                                                                                                                                                                                                                                                                                                                                                                                                 |                                  |         |         |                          |                               |                               |                    |                                  |                                  |            |     |     |          |     |     |
| <table border="1" style="width: 100%; border-collapse: collapse;"> <thead> <tr> <th></th> <th style="text-align: center;">Trial-1</th> <th style="text-align: center;">Trial-2</th> </tr> </thead> <tbody> <tr> <td><math>k_a</math> (<math>M^{-1}s^{-1}</math>)</td> <td style="text-align: center;"><math>(1.08 \pm 0.03) \times 10^5</math></td> <td style="text-align: center;"><math>(1.09 \pm 0.03) \times 10^5</math></td> </tr> <tr> <td><math>k_d</math> (<math>s^{-1}</math>)</td> <td style="text-align: center;"><math>(4.54 \pm 0.05) \times 10^{-2}</math></td> <td style="text-align: center;"><math>(4.61 \pm 0.05) \times 10^{-2}</math></td> </tr> <tr> <td><math>K_D</math> (nM)</td> <td style="text-align: center;">421</td> <td style="text-align: center;">423</td> </tr> <tr> <td><math>\chi^2</math></td> <td style="text-align: center;">1.5</td> <td style="text-align: center;">1.4</td> </tr> </tbody> </table> |                                                                                                                                                                                                                                                                                                                                                                                                                                 |                                  | Trial-1 | Trial-2 | $k_a$ ( $M^{-1}s^{-1}$ ) | $(1.08 \pm 0.03) \times 10^5$ | $(1.09 \pm 0.03) \times 10^5$ | $k_d$ ( $s^{-1}$ ) | $(4.54 \pm 0.05) \times 10^{-2}$ | $(4.61 \pm 0.05) \times 10^{-2}$ | $K_D$ (nM) | 421 | 423 | $\chi^2$ | 1.5 | 1.4 |
|                                                                                                                                                                                                                                                                                                                                                                                                                                                                                                                                                                                                                                                                                                                                                                                                                                                                                                                                              | Trial-1                                                                                                                                                                                                                                                                                                                                                                                                                         | Trial-2                          |         |         |                          |                               |                               |                    |                                  |                                  |            |     |     |          |     |     |
| $k_a$ ( $M^{-1}s^{-1}$ )                                                                                                                                                                                                                                                                                                                                                                                                                                                                                                                                                                                                                                                                                                                                                                                                                                                                                                                     | $(1.08 \pm 0.03) \times 10^5$                                                                                                                                                                                                                                                                                                                                                                                                   | $(1.09 \pm 0.03) \times 10^5$    |         |         |                          |                               |                               |                    |                                  |                                  |            |     |     |          |     |     |
| $k_d$ ( $s^{-1}$ )                                                                                                                                                                                                                                                                                                                                                                                                                                                                                                                                                                                                                                                                                                                                                                                                                                                                                                                           | $(4.54 \pm 0.05) \times 10^{-2}$                                                                                                                                                                                                                                                                                                                                                                                                | $(4.61 \pm 0.05) \times 10^{-2}$ |         |         |                          |                               |                               |                    |                                  |                                  |            |     |     |          |     |     |
| $K_D$ (nM)                                                                                                                                                                                                                                                                                                                                                                                                                                                                                                                                                                                                                                                                                                                                                                                                                                                                                                                                   | 421                                                                                                                                                                                                                                                                                                                                                                                                                             | 423                              |         |         |                          |                               |                               |                    |                                  |                                  |            |     |     |          |     |     |
| $\chi^2$                                                                                                                                                                                                                                                                                                                                                                                                                                                                                                                                                                                                                                                                                                                                                                                                                                                                                                                                     | 1.5                                                                                                                                                                                                                                                                                                                                                                                                                             | 1.4                              |         |         |                          |                               |                               |                    |                                  |                                  |            |     |     |          |     |     |
| n                                                                                                                                                                                                                                                                                                                                                                                                                                                                                                                                                                                                                                                                                                                                                                                                                                                                                                                                            | ND                                                                                                                                                                                                                                                                                                                                                                                                                              |                                  |         |         |                          |                               |                               |                    |                                  |                                  |            |     |     |          |     |     |

Supplementary Table 22

| compound 7                                                                                                                  | RNA SEQUENCE                                                                                                                                                                                                                                                                       |                                  |         |         |
|-----------------------------------------------------------------------------------------------------------------------------|------------------------------------------------------------------------------------------------------------------------------------------------------------------------------------------------------------------------------------------------------------------------------------|----------------------------------|---------|---------|
| 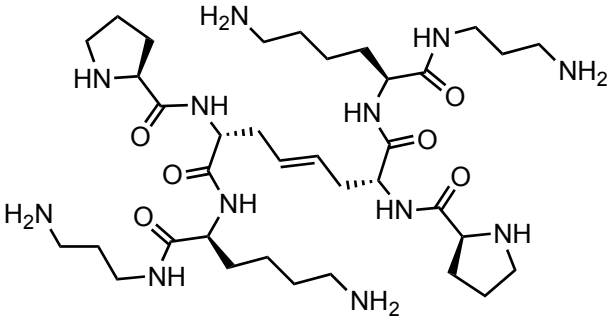                                           | <pre>           GC                       C          / \         U   C        /   \       CG   U      /     \     (U     C)    /       \   C         U    \       /    CG      CG    CG      CG    GC      CG    CG      CG    CG3'   C    C    5'           </pre> <p>(CCUG)10</p> |                                  |         |         |
|                                          |                                                                                                                                                                                                                                                                                    |                                  |         |         |
| <table border="0" style="width: 100%; text-align: center;"> <tr> <td></td> <td>Trial-1</td> <td>Trial-2</td> </tr> </table> |                                                                                                                                                                                                                                                                                    |                                  | Trial-1 | Trial-2 |
|                                                                                                                             | Trial-1                                                                                                                                                                                                                                                                            | Trial-2                          |         |         |
| $k_a$ ( $M^{-1}s^{-1}$ )                                                                                                    | $(1.27 \pm 0.1) \times 10^4$                                                                                                                                                                                                                                                       | $(1.34 \pm 0.7) \times 10^4$     |         |         |
| $k_d$ ( $s^{-1}$ )                                                                                                          | $(3.93 \pm 0.1) \times 10^{-1}$                                                                                                                                                                                                                                                    | $(5.51 \pm 0.01) \times 10^{-1}$ |         |         |
| $K_D$ (nM)                                                                                                                  | 31100                                                                                                                                                                                                                                                                              | 41100                            |         |         |
| $\chi^2$                                                                                                                    | 1.5                                                                                                                                                                                                                                                                                | 1.4                              |         |         |
| n                                                                                                                           | ND                                                                                                                                                                                                                                                                                 |                                  |         |         |

Supplementary Table 23

|                                                                                                     |                                                                                                                                                         |                                  |
|-----------------------------------------------------------------------------------------------------|---------------------------------------------------------------------------------------------------------------------------------------------------------|----------------------------------|
| <p>compound 7</p> 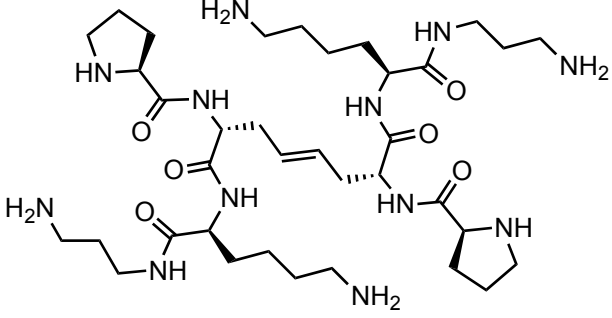 | <p>RNA SEQUENCE</p> <p>G-C<br/> A A<br/> C-G<br/> G-C<br/> (CG A A)<br/> CG CG 4<br/> G-C<br/> C-G<br/> C-G-3'<br/> C<br/> 5'</p> <p><b>(CAG)10</b></p> |                                  |
|                  |                                                                                                                                                         |                                  |
| <p style="text-align: center;">Trial-1 <span style="margin-left: 200px;">Trial-2</span></p>         |                                                                                                                                                         |                                  |
| $k_a$ ( $M^{-1}s^{-1}$ )                                                                            | $(6.5 \pm 0.9) \times 10^4$                                                                                                                             | $(8.6 \pm 0.1) \times 10^4$      |
| $k_d$ ( $s^{-1}$ )                                                                                  | $(2.29 \pm 0.01) \times 10^{-2}$                                                                                                                        | $(2.34 \pm 0.01) \times 10^{-2}$ |
| $K_D$ (nM)                                                                                          | 352                                                                                                                                                     | 273                              |
| $\chi^2$                                                                                            | 2.0                                                                                                                                                     | 2.4                              |
| n                                                                                                   | ND                                                                                                                                                      |                                  |



Supplementary Table 24

|                                                                                                                                                                                                                                                                 |                                                                                                                                                                                                                                                                  |
|-----------------------------------------------------------------------------------------------------------------------------------------------------------------------------------------------------------------------------------------------------------------|------------------------------------------------------------------------------------------------------------------------------------------------------------------------------------------------------------------------------------------------------------------|
| <p>compound 7</p> 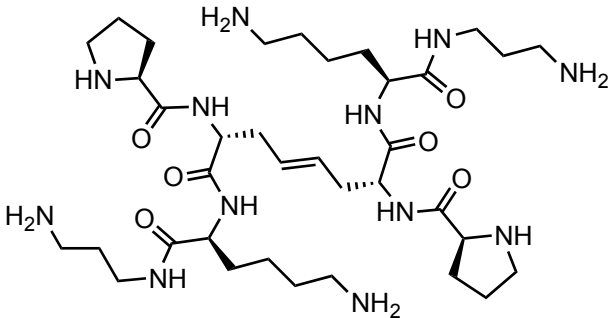                                                                                                                                                             | <p>RNA SEQUENCE</p> <p>C-A<br/>A A<br/>C-G<br/>C-G<br/>C-G<br/>U-A<br/>U-A<br/>C-G<br/>C-G<br/>G-C<br/>G-C 3'<br/>5'</p> <p>HIV-1FSS</p>                                                                                                                         |
|                                                                                                                                                                              |                                                                                                                                                                                                                                                                  |
|                                                                                         |                                                                                                                                                                                                                                                                  |
| <p>Trial-1</p> <p><math>k_a</math> (<math>M^{-1}s^{-1}</math>) <math>(6.9 \pm 0.6) \times 10^4</math></p> <p><math>k_d</math> (<math>s^{-1}</math>) <math>(2.07 \pm 0.06) \times 10^{-2}</math></p> <p><math>K_D</math> (nM) 302</p> <p>Chi<sup>2</sup> 2.2</p> | <p>Trial-2</p> <p><math>k_a</math> (<math>M^{-1}s^{-1}</math>) <math>(6.26 \pm 0.7) \times 10^4</math></p> <p><math>k_d</math> (<math>s^{-1}</math>) <math>(1.90 \pm 0.08) \times 10^{-2}</math></p> <p><math>K_D</math> (nM) 303</p> <p>Chi<sup>2</sup> 2.1</p> |
| <p>n</p>                                                                                                                                                                                                                                                        | <p>1</p>                                                                                                                                                                                                                                                         |

Supplementary Table 25

| compound 8                                                                          | RNA SEQUENCE                                                                                                                                                                                                                                                                                                                                                                                                                                     |                                  |
|-------------------------------------------------------------------------------------|--------------------------------------------------------------------------------------------------------------------------------------------------------------------------------------------------------------------------------------------------------------------------------------------------------------------------------------------------------------------------------------------------------------------------------------------------|----------------------------------|
| 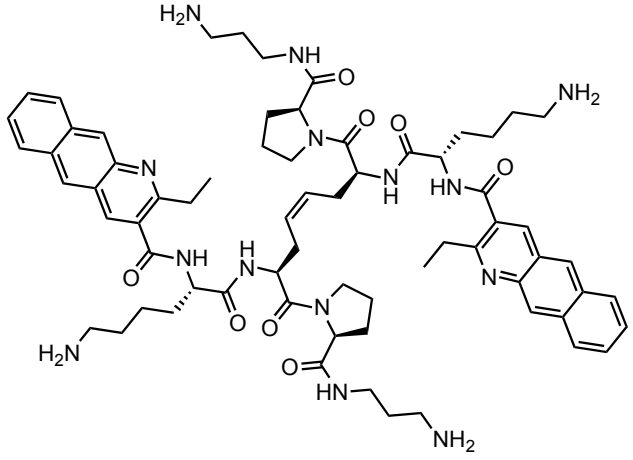   | <p style="text-align: center;">                     G-C<br/>                     U U<br/>                     C-G<br/>                     G-C<br/>                     ( U U )<br/>                     C-G<br/>                     C-G<br/>                     G-C<br/>                     C-G<br/>                     C-G-3'<br/>                     C<br/>                     5'<br/>                     (CUG)10                 </p> |                                  |
|  |                                                                                                                                                                                                                                                                                                                                                                                                                                                  |                                  |
|                                                                                     | Trial-1                                                                                                                                                                                                                                                                                                                                                                                                                                          | Trial-2                          |
| $k_a$ ( $M^{-1}s^{-1}$ )                                                            | $(2.0 \pm 0.3) \times 10^4$                                                                                                                                                                                                                                                                                                                                                                                                                      | $(2.8 \pm 0.5) \times 10^4$      |
| $k_d$ ( $s^{-1}$ )                                                                  | $(3.45 \pm 0.03) \times 10^{-3}$                                                                                                                                                                                                                                                                                                                                                                                                                 | $(2.58 \pm 0.05) \times 10^{-3}$ |
| $K_D$ (nM)                                                                          | 175                                                                                                                                                                                                                                                                                                                                                                                                                                              | 91.8                             |
| Chi <sup>2</sup>                                                                    | 1.5                                                                                                                                                                                                                                                                                                                                                                                                                                              | 1.7                              |
| n                                                                                   | ND                                                                                                                                                                                                                                                                                                                                                                                                                                               |                                  |

Supplementary Table 26

| compound <b>8</b>                                                                   | RNA SEQUENCE                                                                                                                                 |                                                                                               |
|-------------------------------------------------------------------------------------|----------------------------------------------------------------------------------------------------------------------------------------------|-----------------------------------------------------------------------------------------------|
| 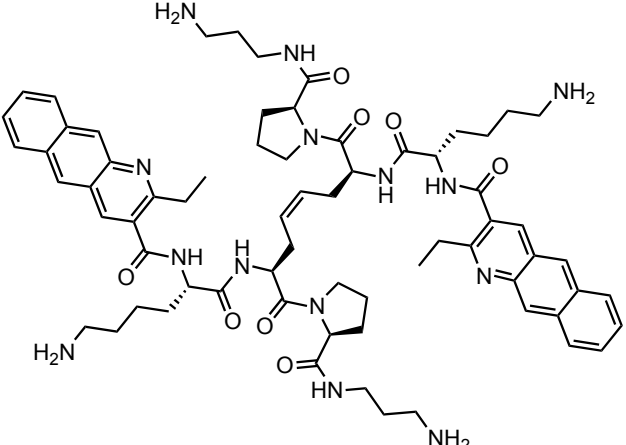   | <pre>       GC     U  C    C  CC   ( U  GC )    C  CC     C  CC     CC    CC   CC   CC   CC   C  5' </pre> <p><b>(CCUG)<sub>10</sub></b></p> |                                                                                               |
|  |                                                                                                                                              |                                                                                               |
| $k_a$ ( $M^{-1}s^{-1}$ )<br>$k_d$ ( $s^{-1}$ )<br>$K_D$ (nM)<br>$\chi^2$            | <p>Trial-1</p> $(1.51 \pm 0.7) \times 10^4$<br>$(4.16 \pm 0.04) \times 10^{-3}$<br>275<br>4.7                                                | <p>Trial-2</p> $(1.57 \pm 0.7) \times 10^4$<br>$(4.90 \pm 0.04) \times 10^{-3}$<br>313<br>4.5 |
| n                                                                                   | ND                                                                                                                                           |                                                                                               |

Supplementary Table 27

| compound <b>8</b>                                                                   | RNA SEQUENCE                                                                                                                                             |                                                                                                |
|-------------------------------------------------------------------------------------|----------------------------------------------------------------------------------------------------------------------------------------------------------|------------------------------------------------------------------------------------------------|
| 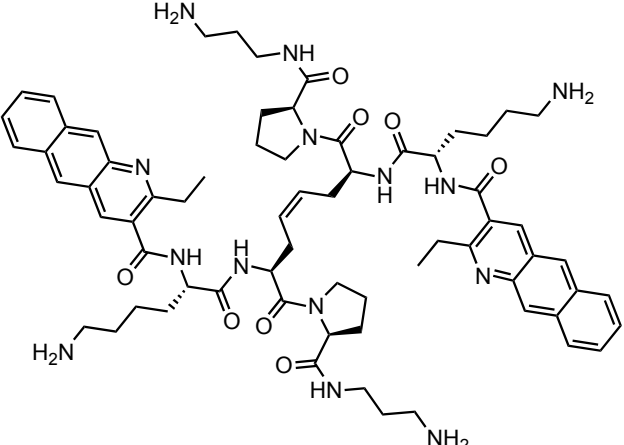   | <p>G-C<br/> A A<br/> C-G<br/> G-C<br/> { A A }<br/> C-G }<br/> C-G }<br/> G-C }<br/> C-G }<br/> C-G-3'<br/> C<br/> 5'<br/> <b>(CAG)<sup>10</sup></b></p> |                                                                                                |
|  |                                                                                                                                                          |                                                                                                |
| $k_a$ ( $M^{-1}s^{-1}$ )<br>$k_d$ ( $s^{-1}$ )<br>$K_D$ (nM)<br>$\chi^2$            | <p>Trial-1</p> $(1.3 \pm 0.4) \times 10^4$<br>$(6.36 \pm 0.05) \times 10^{-3}$<br>504<br>4.5                                                             | <p>Trial-2</p> $(1.23 \pm 0.04) \times 10^4$<br>$(5.49 \pm 0.03) \times 10^{-3}$<br>445<br>5.5 |
| n                                                                                   | ND                                                                                                                                                       |                                                                                                |

Supplementary Table 28

| compound <b>8</b>                                                                   | RNA SEQUENCE                                                                                                       |                                  |
|-------------------------------------------------------------------------------------|--------------------------------------------------------------------------------------------------------------------|----------------------------------|
| 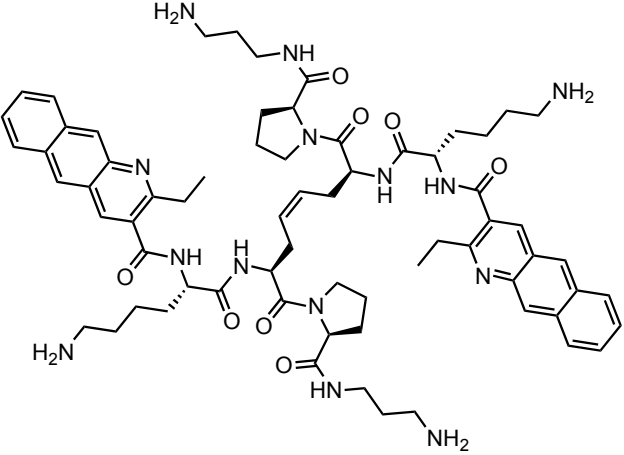   | G-C<br>U-A<br>C-G<br>(G-C)<br>U-A<br>(C-G) <sub>4</sub><br>C-G<br>G-C<br>C-G<br>C-G-3'<br>C<br>5'<br><b>Duplex</b> |                                  |
|  |                                                                                                                    |                                  |
|                                                                                     | Trial-1                                                                                                            | Trial-2                          |
| $k_a$ ( $M^{-1}s^{-1}$ )                                                            | $(2.7 \pm 0.6) \times 10^4$                                                                                        | $(3.1 \pm 0.7) \times 10^4$      |
| $k_d$ ( $s^{-1}$ )                                                                  | $(2.71 \pm 0.03) \times 10^{-3}$                                                                                   | $(2.71 \pm 0.03) \times 10^{-3}$ |
| $K_D$ (nM)                                                                          | 99.9                                                                                                               | 87.8                             |
| $\chi^2$                                                                            | 1.9                                                                                                                | 2.6                              |
| n                                                                                   | ND                                                                                                                 |                                  |

Supplementary Table 29

| compound 9                                                                          | RNA SEQUENCE                                                                                                                                                                                                                                                                                                                                                                                                                                     |                                  |
|-------------------------------------------------------------------------------------|--------------------------------------------------------------------------------------------------------------------------------------------------------------------------------------------------------------------------------------------------------------------------------------------------------------------------------------------------------------------------------------------------------------------------------------------------|----------------------------------|
| 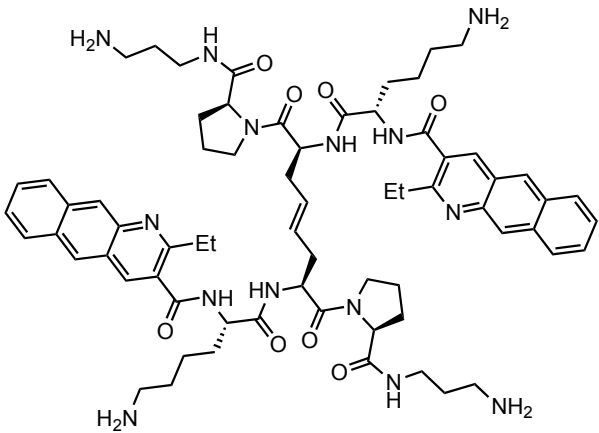   | <p style="text-align: center;">                     G-C<br/>                     U U<br/>                     C-G<br/>                     G-C<br/>                     ( U U )<br/>                     C-G<br/>                     C-G<br/>                     G-C<br/>                     C-G<br/>                     C-G-3'<br/>                     C<br/>                     5'<br/>                     (CUG)10                 </p> |                                  |
|  |                                                                                                                                                                                                                                                                                                                                                                                                                                                  |                                  |
|                                                                                     | Trial-1                                                                                                                                                                                                                                                                                                                                                                                                                                          | Trial-2                          |
| $k_a$ ( $M^{-1}s^{-1}$ )                                                            | $(2.40 \pm 0.5) \times 10^4$                                                                                                                                                                                                                                                                                                                                                                                                                     | $(2.1 \pm 0.5) \times 10^4$      |
| $k_d$ ( $s^{-1}$ )                                                                  | $(2.85 \pm 0.03) \times 10^{-3}$                                                                                                                                                                                                                                                                                                                                                                                                                 | $(2.55 \pm 0.02) \times 10^{-3}$ |
| $K_D$ (nM)                                                                          | 118                                                                                                                                                                                                                                                                                                                                                                                                                                              | 123                              |
| Chi <sup>2</sup>                                                                    | 2.1                                                                                                                                                                                                                                                                                                                                                                                                                                              | 2.2                              |
| n                                                                                   | ND                                                                                                                                                                                                                                                                                                                                                                                                                                               |                                  |

Supplementary Table 30

| compound 9                                                                                                  | RNA SEQUENCE                                                                                                   |                                  |
|-------------------------------------------------------------------------------------------------------------|----------------------------------------------------------------------------------------------------------------|----------------------------------|
| 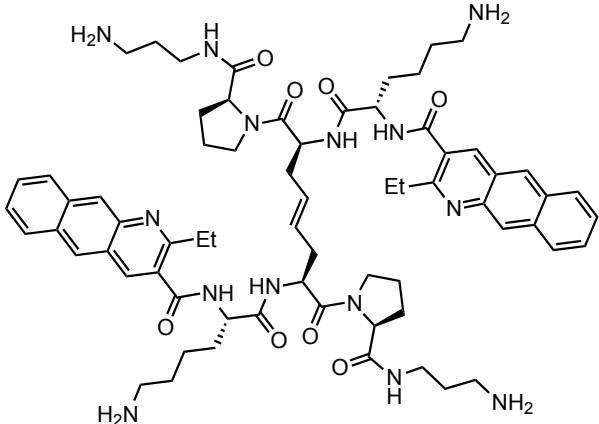                           |  <p>(CCUG)<sub>10</sub></p> |                                  |
| <p>RU</p>  <p>Time s</p> |                                                                                                                |                                  |
|                                                                                                             | Trial-1                                                                                                        | Trial-2                          |
| $k_a$ ( $M^{-1}s^{-1}$ )                                                                                    | $(2.32 \pm 0.5) \times 10^4$                                                                                   | $(1.66 \pm 0.2) \times 10^4$     |
| $k_d$ ( $s^{-1}$ )                                                                                          | $(2.88 \pm 0.02) \times 10^{-3}$                                                                               | $(2.53 \pm 0.02) \times 10^{-3}$ |
| $K_D$ (nM)                                                                                                  | 124                                                                                                            | 152                              |
| $\chi^2$                                                                                                    | 6.3                                                                                                            | 1.9                              |
| n                                                                                                           | ND                                                                                                             |                                  |

Supplementary Table 31

| compound <b>9</b>                                                                   | RNA SEQUENCE                                                                                                                                                                                                                                                                                                                                                                                                                                                   |                                |
|-------------------------------------------------------------------------------------|----------------------------------------------------------------------------------------------------------------------------------------------------------------------------------------------------------------------------------------------------------------------------------------------------------------------------------------------------------------------------------------------------------------------------------------------------------------|--------------------------------|
| 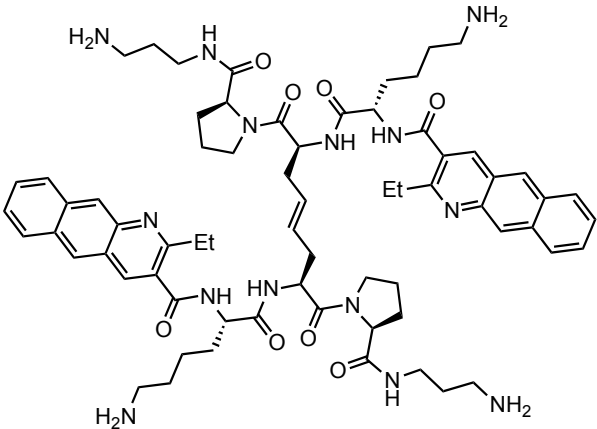   | <p style="text-align: center;">G-C<br/> <span style="color: orange;">A</span> <span style="color: orange;">A</span><br/>           C-G<br/>           G-C<br/>           ( <span style="color: orange;">A</span> <span style="color: orange;">A</span> )<br/>           C-G<br/>           C-G<br/>           G-C<br/>           C-G<br/>           C-G-3'<br/>           C<br/>           5'</p> <p style="text-align: center;"><b>(CAG)<sup>10</sup></b></p> |                                |
|  |                                                                                                                                                                                                                                                                                                                                                                                                                                                                |                                |
|                                                                                     | Trial-1                                                                                                                                                                                                                                                                                                                                                                                                                                                        | Trial-2                        |
| $k_a$ ( $M^{-1}s^{-1}$ )                                                            | $(1.4 \pm 0.1) \times 10^4$                                                                                                                                                                                                                                                                                                                                                                                                                                    | $(1.78 \pm 0.4) \times 10^4$   |
| $k_d$ ( $s^{-1}$ )                                                                  | $(4.03 \pm 0.02) \times 10^{-3}$                                                                                                                                                                                                                                                                                                                                                                                                                               | $(4.0 \pm 0.1) \times 10^{-3}$ |
| $K_D$ (nM)                                                                          | 298                                                                                                                                                                                                                                                                                                                                                                                                                                                            | 228                            |
| $\chi^2$                                                                            | 3.2                                                                                                                                                                                                                                                                                                                                                                                                                                                            | 7.2                            |
| n                                                                                   | ND                                                                                                                                                                                                                                                                                                                                                                                                                                                             |                                |



Supplementary Table 32

| compound 9                                                                          | RNA SEQUENCE                                                                                            |                                  |
|-------------------------------------------------------------------------------------|---------------------------------------------------------------------------------------------------------|----------------------------------|
| 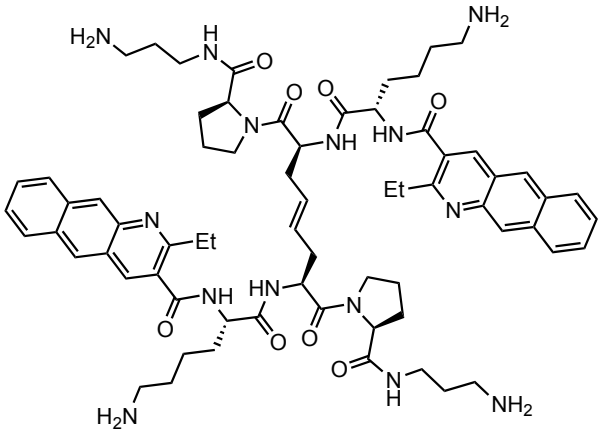   | G-C<br>U-A<br>C-G<br>(G-C)<br>(U-A)<br>(C-G)<br>C-G<br>G-C<br>C-G<br>C-G-3'<br>C<br>5'<br><b>Duplex</b> |                                  |
|  |                                                                                                         |                                  |
|                                                                                     | Trial-1                                                                                                 | Trial-2                          |
| $k_a$ ( $M^{-1}s^{-1}$ )                                                            | $(2.7 \pm 0.6) \times 10^4$                                                                             | $(2.1 \pm 0.2) \times 10^4$      |
| $k_d$ ( $s^{-1}$ )                                                                  | $1.92 \pm 0.02 \times 10^{-3}$                                                                          | $(1.79 \pm 0.01) \times 10^{-3}$ |
| $K_D$ (nM)                                                                          | 70.6                                                                                                    | 80.3                             |
| Chi <sup>2</sup>                                                                    | 1.7                                                                                                     | 1.8                              |
| n                                                                                   | ND                                                                                                      |                                  |

Supplementary Table 33

| compound 9                                                                          | RNA SEQUENCE                                                                                                                                                                        |                                  |
|-------------------------------------------------------------------------------------|-------------------------------------------------------------------------------------------------------------------------------------------------------------------------------------|----------------------------------|
| 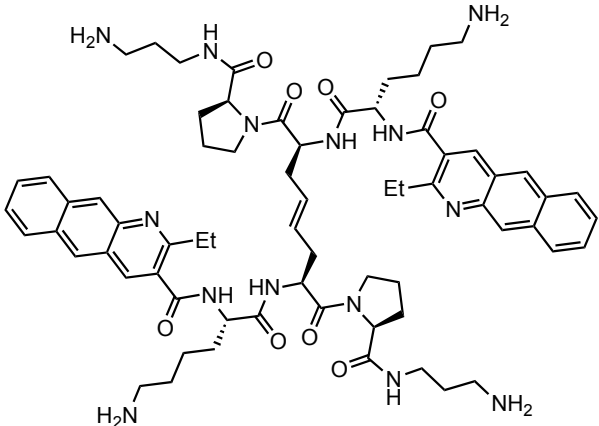   | <p style="text-align: center;">C-A<br/>A A<br/>C-G<br/>C-G<br/>C-G<br/>U-A<br/>U-A<br/>C-G<br/>C-G<br/>G-C<br/>G-C 3'<br/>5'</p> <p style="text-align: center;"><b>HIV-1FSS</b></p> |                                  |
|  |                                                                                                                                                                                     |                                  |
|                                                                                     | Trial-1                                                                                                                                                                             | Trial-2                          |
| $k_a$ ( $M^{-1}s^{-1}$ )                                                            | $(2.0 \pm 0.5) \times 10^4$                                                                                                                                                         | $(4.48 \pm 0.7) \times 10^4$     |
| $k_d$ ( $s^{-1}$ )                                                                  | $1.59 \pm 0.03 \times 10^{-3}$                                                                                                                                                      | $(2.41 \pm 0.03) \times 10^{-3}$ |
| $K_D$ (nM)                                                                          | 80.4                                                                                                                                                                                | 53.9                             |
| $\chi^2$                                                                            | 1.1                                                                                                                                                                                 | 1.4                              |
| n                                                                                   | ND                                                                                                                                                                                  |                                  |

Supplementary Table 34

| compound <b>10</b>                                                                  | RNA SEQUENCE                                                                                                                                                                                                                                                                                                                                                                                                                                                   |                                  |
|-------------------------------------------------------------------------------------|----------------------------------------------------------------------------------------------------------------------------------------------------------------------------------------------------------------------------------------------------------------------------------------------------------------------------------------------------------------------------------------------------------------------------------------------------------------|----------------------------------|
| 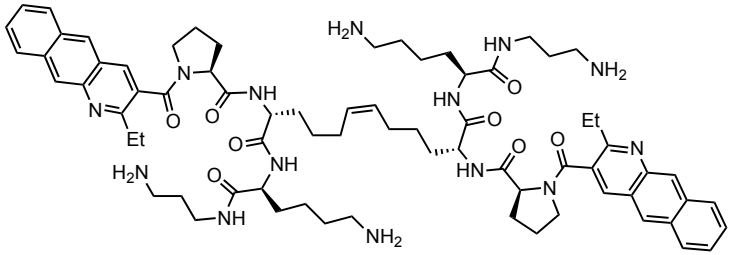   | <p style="text-align: center;">                     G-C<br/>                     U U<br/>                     C-G<br/>                     G-C<br/>                     ( U U )<br/>                     C-G )<sub>4</sub><br/>                     C-G<br/>                     G-C<br/>                     C-G<br/>                     C-G-3'<br/>                     C<br/>                     5'<br/>                     (CUG)10                 </p> |                                  |
|  |                                                                                                                                                                                                                                                                                                                                                                                                                                                                |                                  |
|                                                                                     | Trial-1                                                                                                                                                                                                                                                                                                                                                                                                                                                        | Trial-2                          |
| $k_a$ ( $M^{-1}s^{-1}$ )                                                            | $(4.2 \pm 0.9) \times 10^4$                                                                                                                                                                                                                                                                                                                                                                                                                                    | $(4.7 \pm 0.9) \times 10^4$      |
| $k_d$ ( $s^{-1}$ )                                                                  | $(3.51 \pm 0.01) \times 10^{-3}$                                                                                                                                                                                                                                                                                                                                                                                                                               | $(3.68 \pm 0.02) \times 10^{-3}$ |
| $K_D$ (nM)                                                                          | 84.4                                                                                                                                                                                                                                                                                                                                                                                                                                                           | 78.7                             |
| Chi <sup>2</sup>                                                                    | 1.9                                                                                                                                                                                                                                                                                                                                                                                                                                                            | 1.7                              |
| n                                                                                   | ND                                                                                                                                                                                                                                                                                                                                                                                                                                                             |                                  |

Supplementary Table 35

| compound <b>10</b>                                                                  | RNA SEQUENCE                                                                                                                                                                                                                                                                                                                                                                                                                                                                                                                                                                                                                                                                                                                              |                                  |
|-------------------------------------------------------------------------------------|-------------------------------------------------------------------------------------------------------------------------------------------------------------------------------------------------------------------------------------------------------------------------------------------------------------------------------------------------------------------------------------------------------------------------------------------------------------------------------------------------------------------------------------------------------------------------------------------------------------------------------------------------------------------------------------------------------------------------------------------|----------------------------------|
| 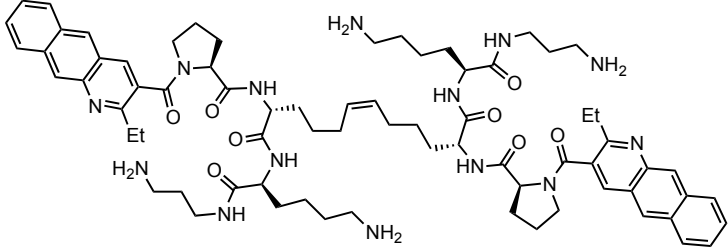   | <p style="text-align: center;"> <math display="block">\begin{matrix} &amp; &amp; \text{GC} &amp; &amp; \\ &amp; \text{U} &amp; &amp; \text{C} &amp; \\ &amp; \text{C} &amp; &amp; \text{U} &amp; \\ &amp; \text{CG} &amp; &amp; \text{GC} &amp; \\ \left( \begin{matrix} \text{U} &amp; &amp; \text{C} \\ \text{C} &amp; &amp; \text{U} \end{matrix} \right) &amp; &amp; &amp; &amp; \\ &amp; \text{CG} &amp; &amp; \text{GC} &amp; \\ &amp; \text{GC} &amp; &amp; \text{GC} &amp; \\ &amp; \text{CG} &amp; &amp; \text{CG} &amp; \\ &amp; \text{CG-3}' &amp; &amp; &amp; \\ &amp; \text{C} &amp; &amp; &amp; \\ &amp; \text{5}' &amp; &amp; &amp; \end{matrix}</math> </p> <p style="text-align: center;"><b>(CCUG)<sub>10</sub></b></p> |                                  |
|  |                                                                                                                                                                                                                                                                                                                                                                                                                                                                                                                                                                                                                                                                                                                                           |                                  |
|                                                                                     | Trial-1                                                                                                                                                                                                                                                                                                                                                                                                                                                                                                                                                                                                                                                                                                                                   | Trial-2                          |
| $k_a$ ( $\text{M}^{-1}\text{s}^{-1}$ )                                              | $(2.0 \pm 0.4) \times 10^4$                                                                                                                                                                                                                                                                                                                                                                                                                                                                                                                                                                                                                                                                                                               | $(1.8 \pm 0.4) \times 10^4$      |
| $k_d$ ( $\text{s}^{-1}$ )                                                           | $(5.39 \pm 0.05) \times 10^{-3}$                                                                                                                                                                                                                                                                                                                                                                                                                                                                                                                                                                                                                                                                                                          | $(5.29 \pm 0.04) \times 10^{-3}$ |
| $K_D$ (nM)                                                                          | 265                                                                                                                                                                                                                                                                                                                                                                                                                                                                                                                                                                                                                                                                                                                                       | 292                              |
| $\text{Chi}^2$                                                                      | 1.3                                                                                                                                                                                                                                                                                                                                                                                                                                                                                                                                                                                                                                                                                                                                       | 1.2                              |
| n                                                                                   | ND                                                                                                                                                                                                                                                                                                                                                                                                                                                                                                                                                                                                                                                                                                                                        |                                  |

Supplementary Table 36

| compound 11                                                                                                                                                               | RNA SEQUENCE                                                                                                                                                                                                                                                                                                                                                                                                                                        |                                                                                                                                                       |
|---------------------------------------------------------------------------------------------------------------------------------------------------------------------------|-----------------------------------------------------------------------------------------------------------------------------------------------------------------------------------------------------------------------------------------------------------------------------------------------------------------------------------------------------------------------------------------------------------------------------------------------------|-------------------------------------------------------------------------------------------------------------------------------------------------------|
| 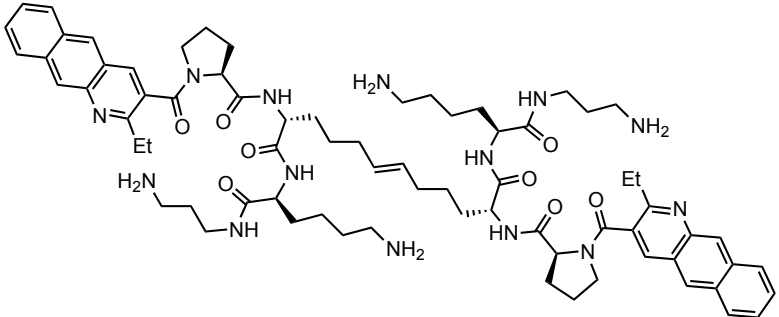                                                                                        | <p style="text-align: center;">                     G-C<br/>                     U U<br/>                     C-G<br/>                     G-C<br/>                     ( U U )<br/>                     C-G C<br/>                     C-G C<br/>                     G-C C<br/>                     C-G C<br/>                     C-G-3'<br/>                     C<br/>                     5'<br/>                     (CUG)<sub>10</sub> </p> |                                                                                                                                                       |
|                                                                                        |                                                                                                                                                                                                                                                                                                                                                                                                                                                     |                                                                                                                                                       |
|   |                                                                                                                                                                                                                                                                                                                                                                                                                                                     |                                                                                                                                                       |
|                                                                                                                                                                           | Trial-1<br>$k_a$ ( $M^{-1}s^{-1}$ ) $(2.4 \pm 0.2) \times 10^4$<br>$k_d$ ( $s^{-1}$ ) $(3.6 \pm 0.2) \times 10^{-4}$<br>$K_D$ (nM) 16<br>$\chi^2$ 1.3                                                                                                                                                                                                                                                                                               | Trial-2<br>$k_a$ ( $M^{-1}s^{-1}$ ) $(2.5 \pm 0.8) \times 10^4$<br>$k_d$ ( $s^{-1}$ ) $(7.3 \pm 0.1) \times 10^{-4}$<br>$K_D$ (nM) 29<br>$\chi^2$ 1.6 |
| n                                                                                                                                                                         | 5                                                                                                                                                                                                                                                                                                                                                                                                                                                   |                                                                                                                                                       |

Supplementary Table 37

| compound 11                                                                          | RNA SEQUENCE                                                                                                                                  |
|--------------------------------------------------------------------------------------|-----------------------------------------------------------------------------------------------------------------------------------------------|
| 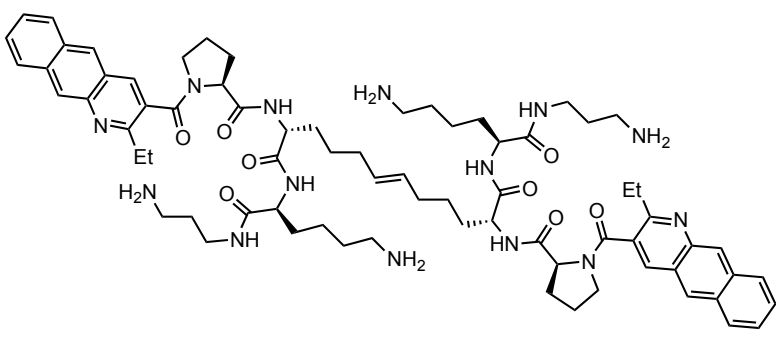   | <p>G-C<br/> U U<br/> C-G<br/> G-C<br/> U U<br/> C-G<br/> C-G<br/> G-C<br/> C-G<br/> C-G-3'<br/> C<br/> 5'</p> <p><b>(CUG)<sub>4</sub></b></p> |
|   |                                                                                                                                               |
|  |                                                          |
|                                                                                      | <p style="text-align: center;">Trial-1</p>                                                                                                    |
| $k_a$ ( $M^{-1}s^{-1}$ )                                                             | $(2.1 \pm 0.5) \times 10^4$                                                                                                                   |
| $k_d$ ( $s^{-1}$ )                                                                   | $(1.1 \pm 0.7) \times 10^{-3}$                                                                                                                |
| $K_D$ (nM)                                                                           | 51                                                                                                                                            |
| $\chi^2$                                                                             | 1.0                                                                                                                                           |
|                                                                                      | <p style="text-align: center;">Trial-2</p>                                                                                                    |
| $k_a$ ( $M^{-1}s^{-1}$ )                                                             | $(9.1 \pm 0.8) \times 10^3$                                                                                                                   |
| $k_d$ ( $s^{-1}$ )                                                                   | $(6.2 \pm 0.6) \times 10^{-4}$                                                                                                                |
| $K_D$ (nM)                                                                           | 69                                                                                                                                            |
| $\chi^2$                                                                             | 1.8                                                                                                                                           |
| n                                                                                    | 1                                                                                                                                             |

**Supplementary Table 38**

| compound 11                                                                         | RNA SEQUENCE                                                                                                                                                                 |                                  |
|-------------------------------------------------------------------------------------|------------------------------------------------------------------------------------------------------------------------------------------------------------------------------|----------------------------------|
| 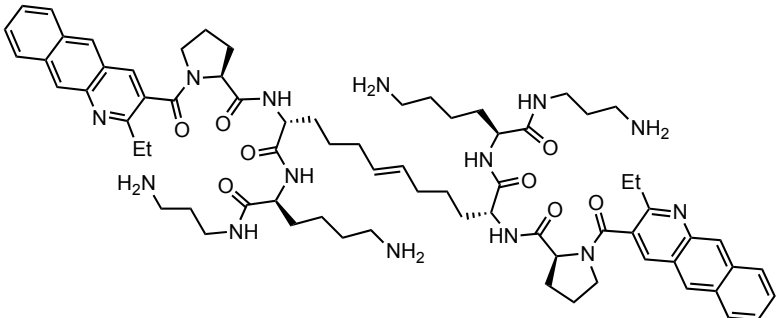  | <p>G-C<br/> <b>U U</b><br/>           C-G<br/>           G-C<br/>           C-G<br/>           C-G-3'<br/>           C<br/>           5'</p> <p><b>(CUG)<sub>2</sub></b></p> |                                  |
|  |                                                                                                                                                                              |                                  |
|                                                                                     | Trial-1                                                                                                                                                                      | Trial-2                          |
| $k_a$ ( $M^{-1}s^{-1}$ )                                                            | $(9.1 \pm 0.5) \times 10^3$                                                                                                                                                  | $(9.85 \pm 0.2) \times 10^3$     |
| $k_d$ ( $s^{-1}$ )                                                                  | $(5.18 \pm 0.09) \times 10^{-3}$                                                                                                                                             | $(7.57 \pm 0.09) \times 10^{-3}$ |
| $K_D$ (nM)                                                                          | 568                                                                                                                                                                          | 768                              |
| $\chi^2$                                                                            | 0.8                                                                                                                                                                          | 1.0                              |
| n                                                                                   | ND                                                                                                                                                                           |                                  |





Supplementary Table 40

| compound <b>11</b>                                                                  | RNA SEQUENCE                                                                                                                                       |                                  |
|-------------------------------------------------------------------------------------|----------------------------------------------------------------------------------------------------------------------------------------------------|----------------------------------|
| 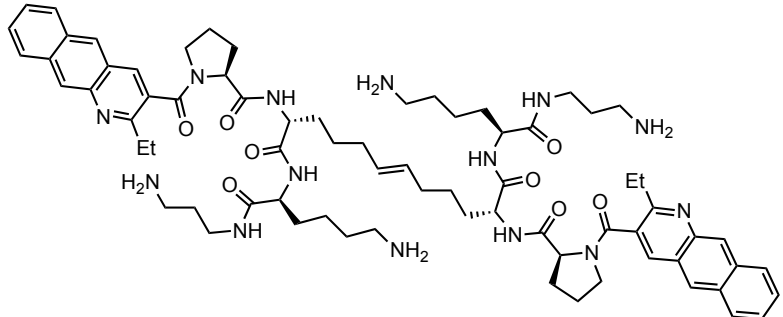  | <p>G-C<br/> A A<br/> C-G<br/> G-C<br/> { A A }<br/> C-G<br/> C-G<br/> G-C<br/> C-G<br/> C-G-3'<br/> C<br/> 5'</p> <p><b>(CAG)<sup>10</sup></b></p> |                                  |
|  |                                                                                                                                                    |                                  |
|                                                                                     | Trial-1                                                                                                                                            | Trial-2                          |
| $K_a$ ( $M^{-1}s^{-1}$ )                                                            | $(1.6 \pm 0.6) \times 10^4$                                                                                                                        | $(1.29 \pm 0.1) \times 10^4$     |
| $K_d$ ( $s^{-1}$ )                                                                  | $(1.32 \pm 0.01) \times 10^{-2}$                                                                                                                   | $(1.14 \pm 0.08) \times 10^{-2}$ |
| $K_D$ (nM)                                                                          | 846                                                                                                                                                | 878                              |
| $\chi^2$                                                                            | 4.1                                                                                                                                                | 2.4                              |
| n                                                                                   | ND                                                                                                                                                 |                                  |

**Supplementary Table 41**

| compound <b>11</b>                                                                    | RNA SEQUENCE                                                                                                                              |
|---------------------------------------------------------------------------------------|-------------------------------------------------------------------------------------------------------------------------------------------|
| 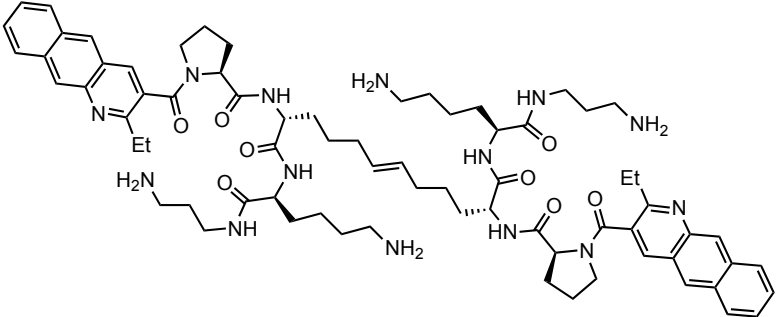    | <p>G-C<br/> U-A<br/> C-G<br/> (G-C)<br/> (U-A)<br/> C-G) 4<br/> C-G<br/> G-C<br/> C-G<br/> C-G-3'<br/> C<br/> 5'</p> <p><b>Duplex</b></p> |
|    |                                                                                                                                           |
| $k_a$ ( $M^{-1}s^{-1}$ )<br>$k_d$ ( $s^{-1}$ )<br>$K_D$ (nM)<br>Chi <sup>2</sup><br>n | <p>-<br/> -<br/> No Binding observed<br/> -<br/> -</p>                                                                                    |

**Supplementary Table 42**

| compound <b>11</b>                                                                  | RNA SEQUENCE                                                                                                                                                                                                                                                                                                                                                                                                                                                                                                                                                                                       |                                  |         |         |                          |                             |                             |                    |                                  |                                  |            |      |      |          |     |     |
|-------------------------------------------------------------------------------------|----------------------------------------------------------------------------------------------------------------------------------------------------------------------------------------------------------------------------------------------------------------------------------------------------------------------------------------------------------------------------------------------------------------------------------------------------------------------------------------------------------------------------------------------------------------------------------------------------|----------------------------------|---------|---------|--------------------------|-----------------------------|-----------------------------|--------------------|----------------------------------|----------------------------------|------------|------|------|----------|-----|-----|
| 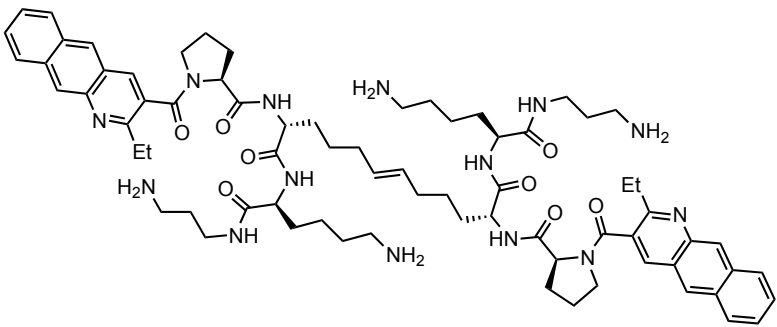  | <p>C-A<br/>                     A A<br/>                     C-G<br/>                     C-G<br/>                     C-G<br/>                     U-A<br/>                     U-A<br/>                     C-G<br/>                     C-G<br/>                     G-C<br/>                     G-C 3'<br/>                     5'</p> <p><b>HIV-1FSS</b></p>                                                                                                                                                                                                                                 |                                  |         |         |                          |                             |                             |                    |                                  |                                  |            |      |      |          |     |     |
|  |                                                                                                                                                                                                                                                                                                                                                                                                                                                                                                                                                                                                    |                                  |         |         |                          |                             |                             |                    |                                  |                                  |            |      |      |          |     |     |
|                                                                                     | <table border="1"> <thead> <tr> <th></th> <th>Trial-1</th> <th>Trial-2</th> </tr> </thead> <tbody> <tr> <td><math>k_a</math> (<math>M^{-1}s^{-1}</math>)</td> <td><math>(9.6 \pm 0.3) \times 10^3</math></td> <td><math>(2.0 \pm 0.8) \times 10^4</math></td> </tr> <tr> <td><math>k_d</math> (<math>s^{-1}</math>)</td> <td><math>(2.52 \pm 0.04) \times 10^{-2}</math></td> <td><math>(2.71 \pm 0.03) \times 10^{-2}</math></td> </tr> <tr> <td><math>K_D</math> (nM)</td> <td>2620</td> <td>1380</td> </tr> <tr> <td><math>\chi^2</math></td> <td>1.5</td> <td>2.1</td> </tr> </tbody> </table> |                                  | Trial-1 | Trial-2 | $k_a$ ( $M^{-1}s^{-1}$ ) | $(9.6 \pm 0.3) \times 10^3$ | $(2.0 \pm 0.8) \times 10^4$ | $k_d$ ( $s^{-1}$ ) | $(2.52 \pm 0.04) \times 10^{-2}$ | $(2.71 \pm 0.03) \times 10^{-2}$ | $K_D$ (nM) | 2620 | 1380 | $\chi^2$ | 1.5 | 2.1 |
|                                                                                     | Trial-1                                                                                                                                                                                                                                                                                                                                                                                                                                                                                                                                                                                            | Trial-2                          |         |         |                          |                             |                             |                    |                                  |                                  |            |      |      |          |     |     |
| $k_a$ ( $M^{-1}s^{-1}$ )                                                            | $(9.6 \pm 0.3) \times 10^3$                                                                                                                                                                                                                                                                                                                                                                                                                                                                                                                                                                        | $(2.0 \pm 0.8) \times 10^4$      |         |         |                          |                             |                             |                    |                                  |                                  |            |      |      |          |     |     |
| $k_d$ ( $s^{-1}$ )                                                                  | $(2.52 \pm 0.04) \times 10^{-2}$                                                                                                                                                                                                                                                                                                                                                                                                                                                                                                                                                                   | $(2.71 \pm 0.03) \times 10^{-2}$ |         |         |                          |                             |                             |                    |                                  |                                  |            |      |      |          |     |     |
| $K_D$ (nM)                                                                          | 2620                                                                                                                                                                                                                                                                                                                                                                                                                                                                                                                                                                                               | 1380                             |         |         |                          |                             |                             |                    |                                  |                                  |            |      |      |          |     |     |
| $\chi^2$                                                                            | 1.5                                                                                                                                                                                                                                                                                                                                                                                                                                                                                                                                                                                                | 2.1                              |         |         |                          |                             |                             |                    |                                  |                                  |            |      |      |          |     |     |
| n                                                                                   | ND                                                                                                                                                                                                                                                                                                                                                                                                                                                                                                                                                                                                 |                                  |         |         |                          |                             |                             |                    |                                  |                                  |            |      |      |          |     |     |

Supplementary Table 43

| Neomycin B                                                                                                                                                                                                                                                                                                                                                                                                                                                                                                                                                                                                                                                                                                                                                                                                                                                                                                        | RNA SEQUENCE                                                                                                                                                                                                                                                                                                                                                                                                                                            |                                  |         |                          |                               |                               |                    |                                  |                                  |            |     |     |          |     |     |  |
|-------------------------------------------------------------------------------------------------------------------------------------------------------------------------------------------------------------------------------------------------------------------------------------------------------------------------------------------------------------------------------------------------------------------------------------------------------------------------------------------------------------------------------------------------------------------------------------------------------------------------------------------------------------------------------------------------------------------------------------------------------------------------------------------------------------------------------------------------------------------------------------------------------------------|---------------------------------------------------------------------------------------------------------------------------------------------------------------------------------------------------------------------------------------------------------------------------------------------------------------------------------------------------------------------------------------------------------------------------------------------------------|----------------------------------|---------|--------------------------|-------------------------------|-------------------------------|--------------------|----------------------------------|----------------------------------|------------|-----|-----|----------|-----|-----|--|
| 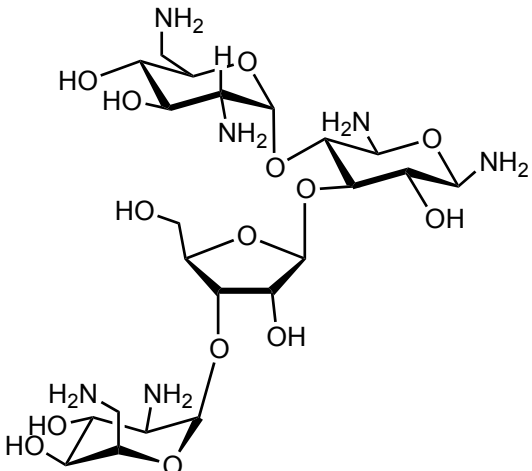                                                                                                                                                                                                                                                                                                                                                                                                                                                                                                                                                                                                                                                                                                                                                                                                                                 | <p style="text-align: center;">                     G-C<br/>                     U U<br/>                     C-G<br/>                     G-C<br/>                     ( U U )<sub>4</sub><br/>                     C-G<br/>                     C-G<br/>                     G-C<br/>                     C-G<br/>                     C-G-3'<br/>                     C<br/>                     5'<br/>                     (CUG)<sub>10</sub> </p> |                                  |         |                          |                               |                               |                    |                                  |                                  |            |     |     |          |     |     |  |
| <p style="text-align: center;">RU</p>                                                                                                                                                                                                                                                                                                                                                                                                                                                                                                                                                                                                                                                                                                                                                                                          |                                                                                                                                                                                                                                                                                                                                                                                                                                                         |                                  |         |                          |                               |                               |                    |                                  |                                  |            |     |     |          |     |     |  |
| <p style="text-align: center;">RU</p>                                                                                                                                                                                                                                                                                                                                                                                                                                                                                                                                                                                                                                                                                                                                                                                          |                                                                                                                                                                                                                                                                                                                                                                    |                                  |         |                          |                               |                               |                    |                                  |                                  |            |     |     |          |     |     |  |
| <table border="0" style="width: 100%;"> <thead> <tr> <th></th> <th style="text-align: center;">Trial-1</th> <th style="text-align: center;">Trial-2</th> </tr> </thead> <tbody> <tr> <td><math>k_a</math> (<math>M^{-1}s^{-1}</math>)</td> <td style="text-align: center;"><math>(1.22 \pm 0.03) \times 10^5</math></td> <td style="text-align: center;"><math>(1.27 \pm 0.04) \times 10^5</math></td> </tr> <tr> <td><math>k_d</math> (<math>s^{-1}</math>)</td> <td style="text-align: center;"><math>(5.74 \pm 0.04) \times 10^{-2}</math></td> <td style="text-align: center;"><math>(4.40 \pm 0.04) \times 10^{-2}</math></td> </tr> <tr> <td><math>K_D</math> (nM)</td> <td style="text-align: center;">472</td> <td style="text-align: center;">346</td> </tr> <tr> <td><math>\chi^2</math></td> <td style="text-align: center;">0.6</td> <td style="text-align: center;">2.3</td> </tr> </tbody> </table> |                                                                                                                                                                                                                                                                                                                                                                                                                                                         | Trial-1                          | Trial-2 | $k_a$ ( $M^{-1}s^{-1}$ ) | $(1.22 \pm 0.03) \times 10^5$ | $(1.27 \pm 0.04) \times 10^5$ | $k_d$ ( $s^{-1}$ ) | $(5.74 \pm 0.04) \times 10^{-2}$ | $(4.40 \pm 0.04) \times 10^{-2}$ | $K_D$ (nM) | 472 | 346 | $\chi^2$ | 0.6 | 2.3 |  |
|                                                                                                                                                                                                                                                                                                                                                                                                                                                                                                                                                                                                                                                                                                                                                                                                                                                                                                                   | Trial-1                                                                                                                                                                                                                                                                                                                                                                                                                                                 | Trial-2                          |         |                          |                               |                               |                    |                                  |                                  |            |     |     |          |     |     |  |
| $k_a$ ( $M^{-1}s^{-1}$ )                                                                                                                                                                                                                                                                                                                                                                                                                                                                                                                                                                                                                                                                                                                                                                                                                                                                                          | $(1.22 \pm 0.03) \times 10^5$                                                                                                                                                                                                                                                                                                                                                                                                                           | $(1.27 \pm 0.04) \times 10^5$    |         |                          |                               |                               |                    |                                  |                                  |            |     |     |          |     |     |  |
| $k_d$ ( $s^{-1}$ )                                                                                                                                                                                                                                                                                                                                                                                                                                                                                                                                                                                                                                                                                                                                                                                                                                                                                                | $(5.74 \pm 0.04) \times 10^{-2}$                                                                                                                                                                                                                                                                                                                                                                                                                        | $(4.40 \pm 0.04) \times 10^{-2}$ |         |                          |                               |                               |                    |                                  |                                  |            |     |     |          |     |     |  |
| $K_D$ (nM)                                                                                                                                                                                                                                                                                                                                                                                                                                                                                                                                                                                                                                                                                                                                                                                                                                                                                                        | 472                                                                                                                                                                                                                                                                                                                                                                                                                                                     | 346                              |         |                          |                               |                               |                    |                                  |                                  |            |     |     |          |     |     |  |
| $\chi^2$                                                                                                                                                                                                                                                                                                                                                                                                                                                                                                                                                                                                                                                                                                                                                                                                                                                                                                          | 0.6                                                                                                                                                                                                                                                                                                                                                                                                                                                     | 2.3                              |         |                          |                               |                               |                    |                                  |                                  |            |     |     |          |     |     |  |
| <p>n</p>                                                                                                                                                                                                                                                                                                                                                                                                                                                                                                                                                                                                                                                                                                                                                                                                                                                                                                          | <p>4</p>                                                                                                                                                                                                                                                                                                                                                                                                                                                |                                  |         |                          |                               |                               |                    |                                  |                                  |            |     |     |          |     |     |  |

Supplementary Table 44

| Neomycin B                                                                                                                                                                                                                                                                                                                                                                                                                                                                                                                                                                                                                                                                                                                                                                                                        | RNA SEQUENCE                                                                                                                                                                                                                                                                                                                                                                                                      |                                  |                              |                               |                    |                                   |                                  |            |      |      |          |     |     |
|-------------------------------------------------------------------------------------------------------------------------------------------------------------------------------------------------------------------------------------------------------------------------------------------------------------------------------------------------------------------------------------------------------------------------------------------------------------------------------------------------------------------------------------------------------------------------------------------------------------------------------------------------------------------------------------------------------------------------------------------------------------------------------------------------------------------|-------------------------------------------------------------------------------------------------------------------------------------------------------------------------------------------------------------------------------------------------------------------------------------------------------------------------------------------------------------------------------------------------------------------|----------------------------------|------------------------------|-------------------------------|--------------------|-----------------------------------|----------------------------------|------------|------|------|----------|-----|-----|
| 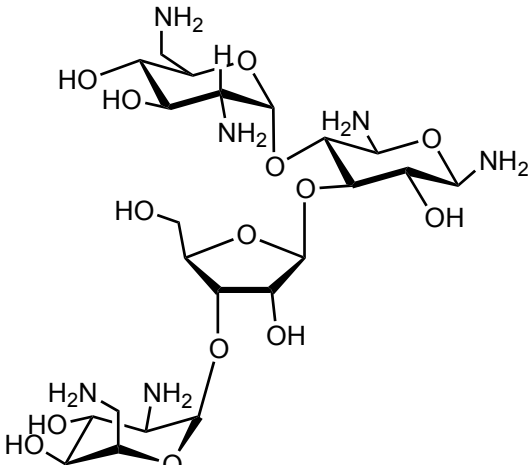                                                                                                                                                                                                                                                                                                                                                                                                                                                                                                                                                                                                                                                                                                                                 | <pre>           GC          /  \         U    C        /      \       C          U      /            \     GG             GC    /              \   ( U              C )    \              /     C              U      \            /       GG           GC        \          /         GG         GC          \        /           GG3'            C             5'            (CCUG)<sub>10</sub>         </pre> |                                  |                              |                               |                    |                                   |                                  |            |      |      |          |     |     |
| <p style="text-align: center;">RU</p>  <p style="text-align: center;">Time</p>                                                                                                                                                                                                                                                                                                                                                                                                                                                                                                                                                                                                                                                 |                                                                                                                                                                                                                                                                                                                                                                                                                   |                                  |                              |                               |                    |                                   |                                  |            |      |      |          |     |     |
| <table style="width: 100%; border: none;"> <tr> <td style="width: 30%;"></td> <td style="width: 35%; text-align: center;">Trial-1</td> <td style="width: 35%; text-align: center;">Trial-2</td> </tr> </table>                                                                                                                                                                                                                                                                                                                                                                                                                                                                                                                                                                                                    |                                                                                                                                                                                                                                                                                                                                                                                                                   |                                  | Trial-1                      | Trial-2                       |                    |                                   |                                  |            |      |      |          |     |     |
|                                                                                                                                                                                                                                                                                                                                                                                                                                                                                                                                                                                                                                                                                                                                                                                                                   | Trial-1                                                                                                                                                                                                                                                                                                                                                                                                           | Trial-2                          |                              |                               |                    |                                   |                                  |            |      |      |          |     |     |
| <table style="width: 100%; border: none;"> <tr> <td style="width: 30%;"><math>K_a</math> (<math>M^{-1}s^{-1}</math>)</td> <td style="width: 35%; text-align: center;"><math>(7.39 \pm 0.2) \times 10^4</math></td> <td style="width: 35%; text-align: center;"><math>(1.44 \pm 0.05) \times 10^4</math></td> </tr> <tr> <td><math>K_d</math> (<math>s^{-1}</math>)</td> <td style="text-align: center;"><math>(1.82 \pm 0.001) \times 10^{-1}</math></td> <td style="text-align: center;"><math>(2.08 \pm 0.06) \times 10^{-1}</math></td> </tr> <tr> <td><math>K_D</math> (nM)</td> <td style="text-align: center;">2460</td> <td style="text-align: center;">1450</td> </tr> <tr> <td><math>\chi^2</math></td> <td style="text-align: center;">3.1</td> <td style="text-align: center;">3.4</td> </tr> </table> |                                                                                                                                                                                                                                                                                                                                                                                                                   | $K_a$ ( $M^{-1}s^{-1}$ )         | $(7.39 \pm 0.2) \times 10^4$ | $(1.44 \pm 0.05) \times 10^4$ | $K_d$ ( $s^{-1}$ ) | $(1.82 \pm 0.001) \times 10^{-1}$ | $(2.08 \pm 0.06) \times 10^{-1}$ | $K_D$ (nM) | 2460 | 1450 | $\chi^2$ | 3.1 | 3.4 |
| $K_a$ ( $M^{-1}s^{-1}$ )                                                                                                                                                                                                                                                                                                                                                                                                                                                                                                                                                                                                                                                                                                                                                                                          | $(7.39 \pm 0.2) \times 10^4$                                                                                                                                                                                                                                                                                                                                                                                      | $(1.44 \pm 0.05) \times 10^4$    |                              |                               |                    |                                   |                                  |            |      |      |          |     |     |
| $K_d$ ( $s^{-1}$ )                                                                                                                                                                                                                                                                                                                                                                                                                                                                                                                                                                                                                                                                                                                                                                                                | $(1.82 \pm 0.001) \times 10^{-1}$                                                                                                                                                                                                                                                                                                                                                                                 | $(2.08 \pm 0.06) \times 10^{-1}$ |                              |                               |                    |                                   |                                  |            |      |      |          |     |     |
| $K_D$ (nM)                                                                                                                                                                                                                                                                                                                                                                                                                                                                                                                                                                                                                                                                                                                                                                                                        | 2460                                                                                                                                                                                                                                                                                                                                                                                                              | 1450                             |                              |                               |                    |                                   |                                  |            |      |      |          |     |     |
| $\chi^2$                                                                                                                                                                                                                                                                                                                                                                                                                                                                                                                                                                                                                                                                                                                                                                                                          | 3.1                                                                                                                                                                                                                                                                                                                                                                                                               | 3.4                              |                              |                               |                    |                                   |                                  |            |      |      |          |     |     |
| <table style="width: 100%; border: none;"> <tr> <td style="width: 30%;"><math>n</math></td> <td colspan="2" style="text-align: center;">ND</td> </tr> </table>                                                                                                                                                                                                                                                                                                                                                                                                                                                                                                                                                                                                                                                    |                                                                                                                                                                                                                                                                                                                                                                                                                   | $n$                              | ND                           |                               |                    |                                   |                                  |            |      |      |          |     |     |
| $n$                                                                                                                                                                                                                                                                                                                                                                                                                                                                                                                                                                                                                                                                                                                                                                                                               | ND                                                                                                                                                                                                                                                                                                                                                                                                                |                                  |                              |                               |                    |                                   |                                  |            |      |      |          |     |     |

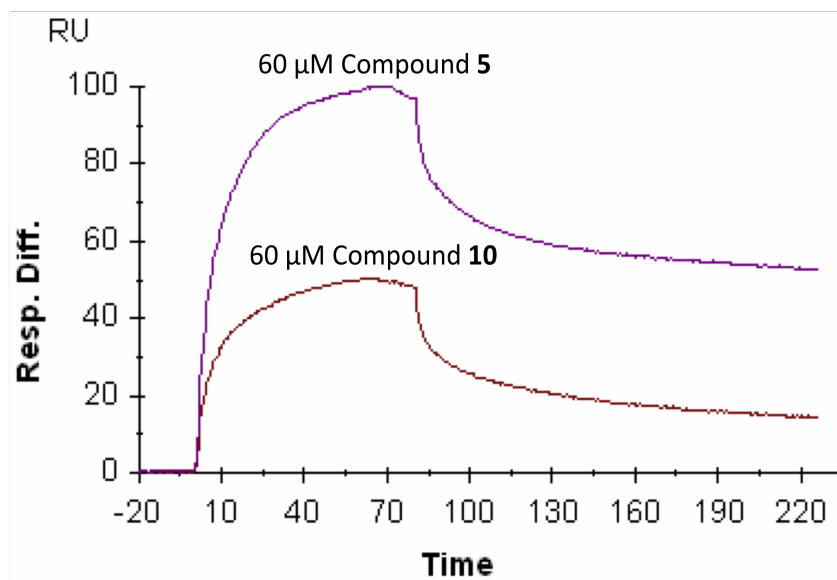

**Supplementary Fig 2:** An excess of **5** provides roughly double the SPR response for a (CUG)<sub>10</sub> chip of an equivalent concentration of **10**, consistent with the two-fold difference in stoichiometry deduced from Scatchard analysis.

Note: The Response Units (RU) has been normalized to 100.

## Binding Analyses by Fluorescence

### ANALYSIS OF (CUG) REPEAT BINDING BY DIRECT MONITORING OF BENZO[G]QUINOLINE FLUORESCENCE.

#### PROCEDURE

Compounds containing the benzo[g]quinoline heterocycle are inherently fluorescent, and hence can be assayed directly for RNA binding due to changes to their fluorescence properties. Fluorescence titration binding measurements were performed on a Cary Eclipse fluorescence spectrophotometer using a 10 mm path-length semimicro quartz fluorescence cell with 400  $\mu$ L sample holding capacity. Absorbance measurements were carried out on a UV-Visible spectrophotometer (Shimadzu, UV-1601PC) using a 1 mL (1 cm path-length) quartz cell. Spectroscopic grade anhydrous methanol used in the measurement of relative quantum yield of the 2-ethyl benzo[g]quinoline carboxylic acid was purchased from Alfa Aesar and was used without further purification.

Relative Quantum Yield of 2-ethyl benzo[g]quinoline carboxylic acid (2) : the quantum yield of the ethyl benzo[g]quinoline carboxylic acid relative to quinine sulfate (sigma Aldrich) was measured by following literature procedure.<sup>12,13</sup> First, absorbance (0.0-0.06 A.U) and emission intensities were recorded for various concentrations (0 -30  $\mu$ M) of **2** in methanol. **2** has two distinct excitation maxima at 260 nm and 362 nm respectively, and an emission maximum at 439 nm in methanol. (**Supplementary Fig. 3 a and b**). The 362 nm was used as excitation wavelength to record fluorescence spectra for various concentrations of (**1**) in methanol. Next, the number of photons emitted was determined by integrating the area under each fluorescence spectrum using Origin 7 graphical software. The gradient of the plot of integrated fluorescence intensity versus absorbance gives the quantum the quantum yield of the fluorophore. The above procedure was repeated for quinine sulfate by measuring absorbance values at 362 nm and fluorescence emission spectra also at 362 nm excitation wavelength using 0.1 M H<sub>2</sub>SO<sub>4</sub> as solvent.

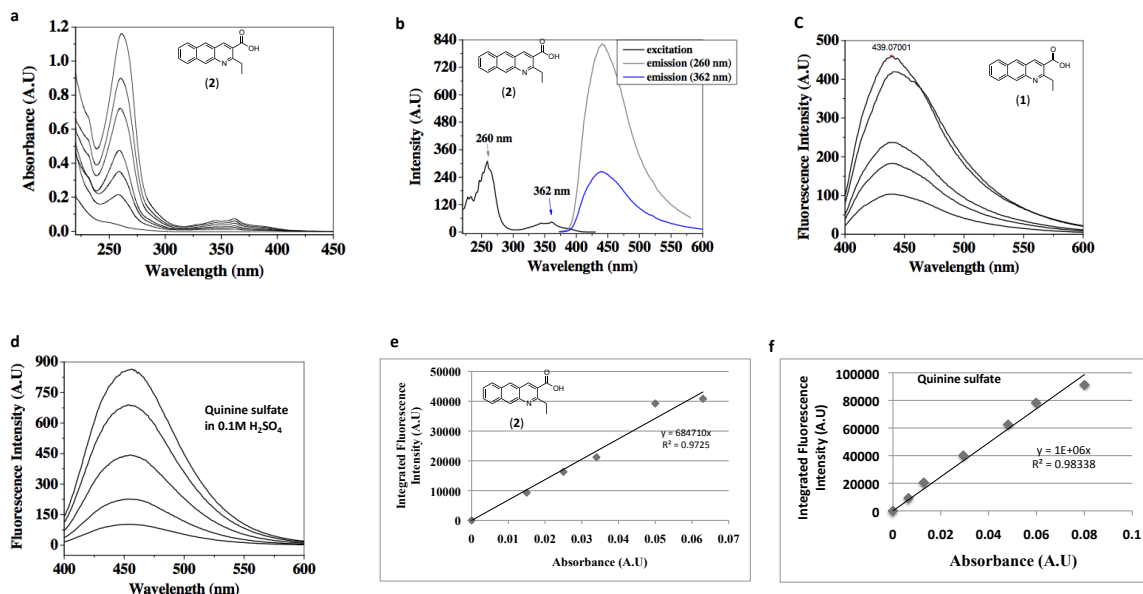

**Supplementary Fig. 3:** Determination of fluorescence quantum yield of 2-ethylbenzo[g]quinoline carboxylic acid. (a) absorption spectrum of (2) in methanol. (b) excitation and emission spectra of benzo[g]quinoline in methanol. (c) Emission spectrum of (2) in methanol. (d) Emission spectrum of quinine sulfate in 0.1 N H<sub>2</sub>SO<sub>4</sub>. (e, f) Plots of integrated fluorescence intensity versus absorbance for benzo[g]quinoline and quinine sulfate respectively.

The fluorescence quantum yield ( $\Phi$ ) of **2** relative to the quinine sulfate standard was calculated as 0.64 using the relation:

$$\Phi_{(X)} = \Phi_{ST} \left( \frac{Grad_X}{Grad_{ST}} \right) \left( \frac{\eta_X}{\eta_{ST}} \right)^2 \quad (1)$$

Where the subscripts ST and X denote standard (quinine sulfate) and test sample (**2**) respectively, and  $\Phi$  is the fluorescence quantum yield. *Grad* is the gradient from the plot of integrated fluorescence intensity versus absorbance, and  $\eta$  is the refractive index of the solvents used. (1.3325 for water, and 1.3312 for methanol).



Binding analyses of compounds 3, 4 and 5 by fluorescence based assay: fluorescence binding measurements were carried out in autoclaved 1x HEPES buffered saline (HBS-N) (0.01 M HEPES, 0.15 M NaCl, pH = 7.4). Rnase-free HPLC purified unlabeled (CUG)<sub>10</sub> repeat RNA was purchased from Integrated DNA Technologies Inc. A 10 μM solution of (CUG)<sub>10</sub> RNA in 1000 μL HBS-N buffer was heated to 70 °C for 2 min and then allowed to cool slowly to room temperature in order to ensure that the RNA assumes its secondary hairpin structure. A 1 μM solution of compound was prepared in HBS-N and then 400 μL of this was taken in the cell and excited with a wavelength of 360 nm at a 10 nm slit width. The emission spectrum was collected from 430 nm to 580 nm wavelength range at a PMT voltage of 680 V and 20 nm slit width. The (CUG)<sub>10</sub> RNA in 1 x HBS was then titrated into the cell containing the compound starting from 1 μL from the 10 μM stock. After each addition, the solution was mixed thorough by pipetting up and down, then allowed to equilibrate for a minimum of 10 min before the fluorescence emission spectra were taken. Equilibrium was determined to be established after taking three similar fluorescence spectra at 1 min intervals. The decrease in the fluorescence intensity of the compound was noted at 468.5 nm for each added concentration of RNA. The fluorescence units (FU) were then corrected for dilution and the FU after each addition was subtracted from the FU at zero RNA concentration to give ΔFU. The titration was discontinued when the binding approached saturation, which was signified by little or no change in FU upon addition of RNA. This ΔFU was plotted against RNA concentration using Origin 7 (OriginLab Corp.). The data were fit to a one-site binding model (equation 2) to obtain apparent binding constants ( $K_D$ ).

$$Y = \frac{B_{\max} X}{K_D + X} \quad (4)$$

Where  $Y$  = bound ligand:receptor complex concentration,  $B_{\max}$  is the total receptor concentration,  $X$  is the total ligand concentration and  $K_D$  is the dissociation constant. Each titration experiment was repeated at least two times. Representative titration curves as well as emission/excitation spectra for compound 4 and 5 are shown. (**Supplementary Fig. 4**)

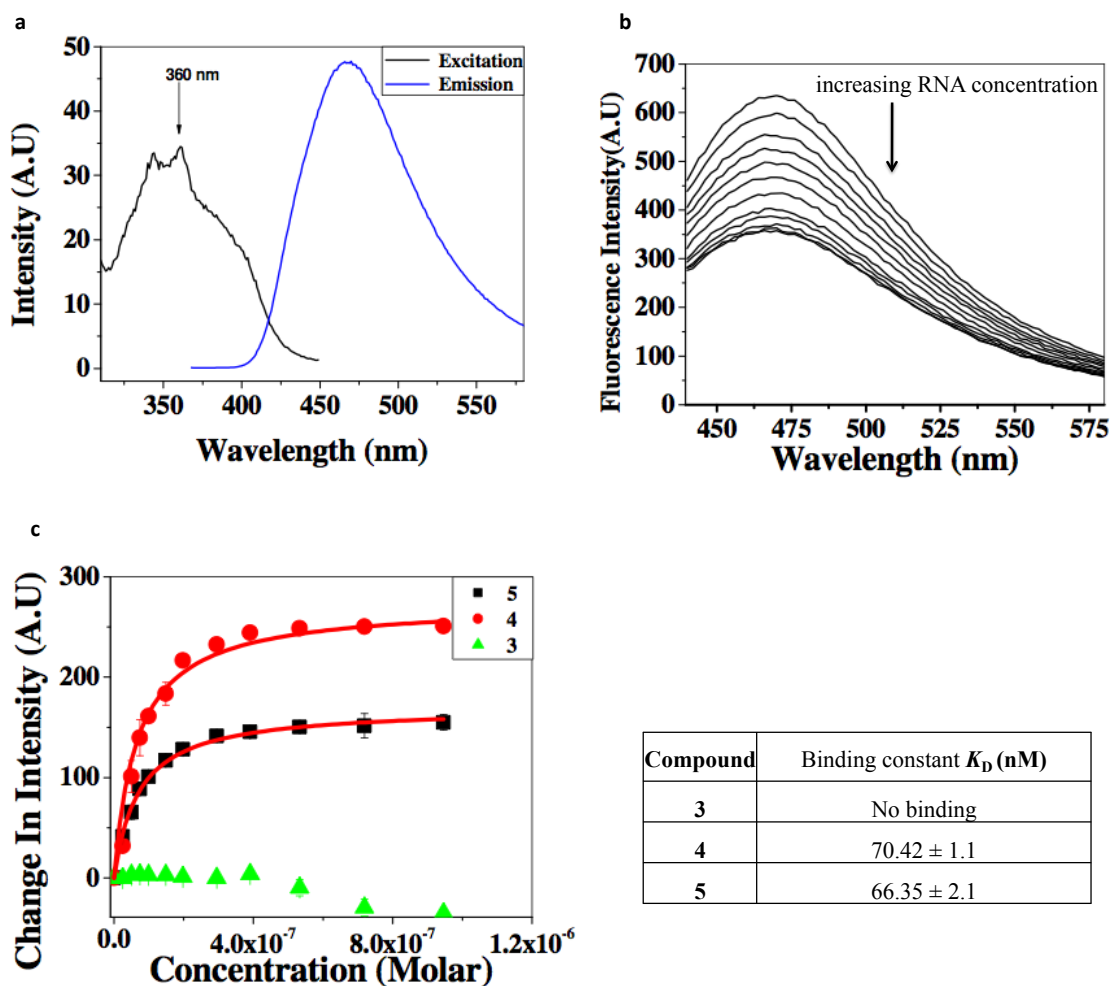

**Supplementary Fig. 4:** (a) Excitation and emission spectra for **4** in HBS-N buffer. (b) Representative fluorescence emission intensity spectra for titration of unlabeled CUG10 RNA into 1 $\mu$ M solution of **4** in HBS-N buffer. The fluorescence intensity of the compound showed quenching upon addition of the target RNA. (c) Plots of change in fluorescence intensity units ( $\Delta F_U = F_0 - F_n$ ) against concentration for titration of **3**, **4** and **5**, fitted with a onsite-binding fit (red line) to obtain apparent  $K_D$  (table at the bottom right). Error-bars are standard deviations for at least two separate titrations.

Binding analyses of compounds **10** and **11** by fluorescence based assay: The procedure for measuring the binding constant for **10** and **11** was the same as that used for compounds **3**, **4** and **5** above. The emission and excitation spectra as well as representative fluorescence titration intensity spectra are shown in **supplementary Fig. 5** below.

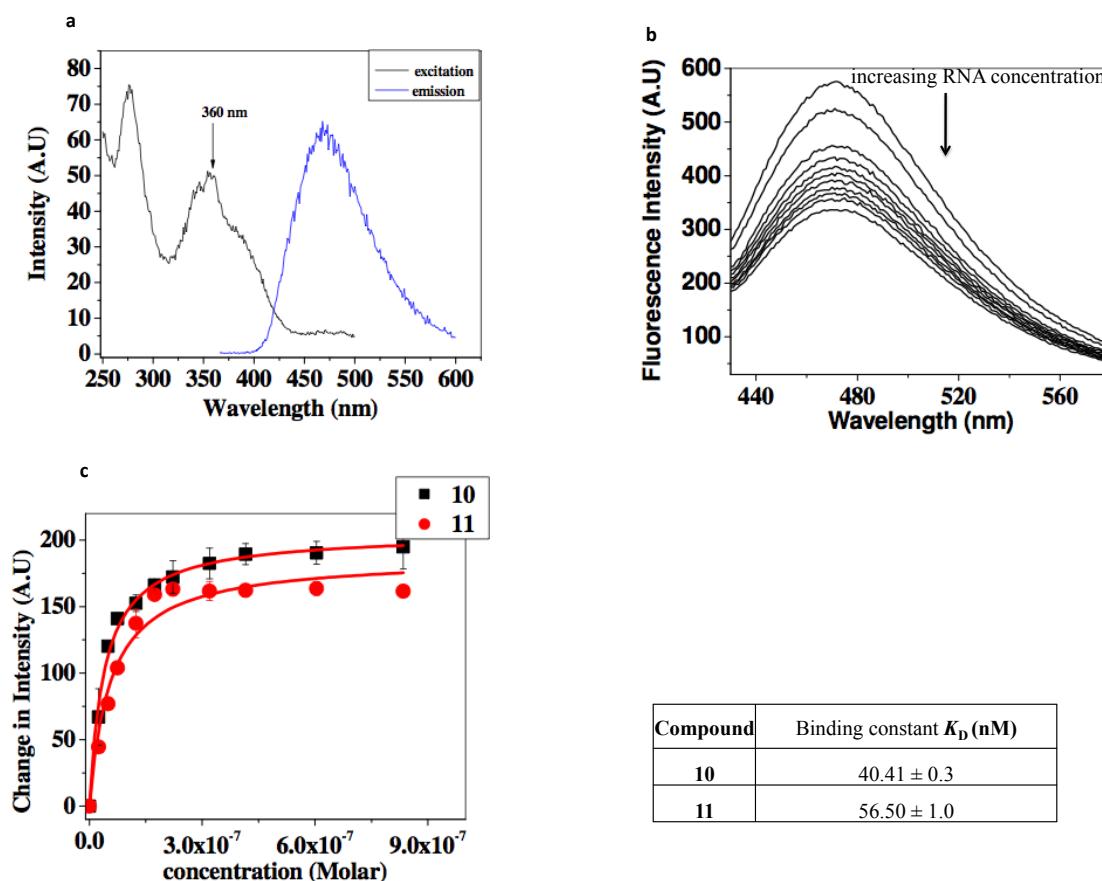

**Supplementary Fig. 5:** Binding analysis of extended compounds **10** and **11** to  $(CUG)_{10}$  RNA measured by direct monitoring of benzo[g]quinoline fluorescence. (a) Excitation and emission spectra for compound **10** in HBS-N buffer pH=7.4. (b) Representative emission spectrum showing the quenching of ligand fluorescence with increasing RNA concentration. (c) Plots of change in fluorescence intensity against concentration for the titration of **10** and **11**. The data were fitted to one-site binding equations (red line) to obtain the  $K_D$  shown in the table at the bottom left.

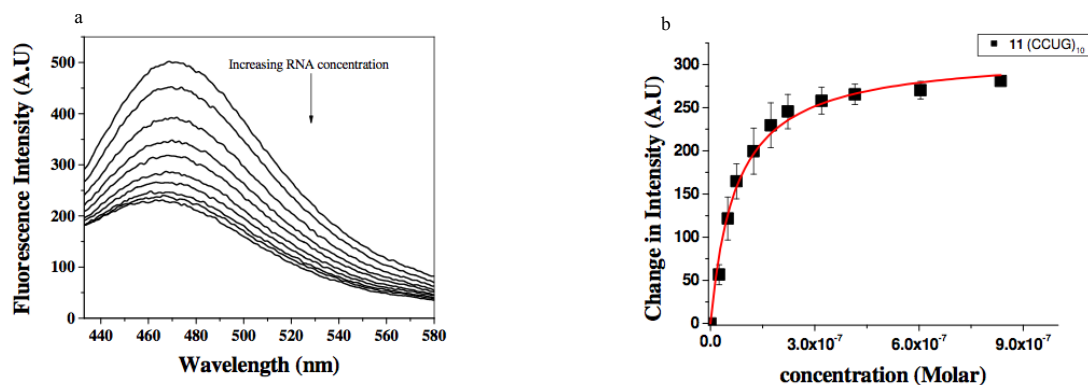

**Supplementary Fig. 6:** Binding analysis of **11** to (CCUG)<sub>10</sub> RNA measured by direct monitoring of benzo[g]quinoline fluorescence. (a) Representative emission spectra showing fluorescence quenching with increasing RNA concentration. (b) Plot of change in fluorescence intensity against concentration (black squares), fitted (Red line) to a one-site binding equation to obtain an apparent  $K_D$  of  $73.62 \pm 0.75$  nM. The error represents an average of two separate titrations.

### Cell permeation assessment

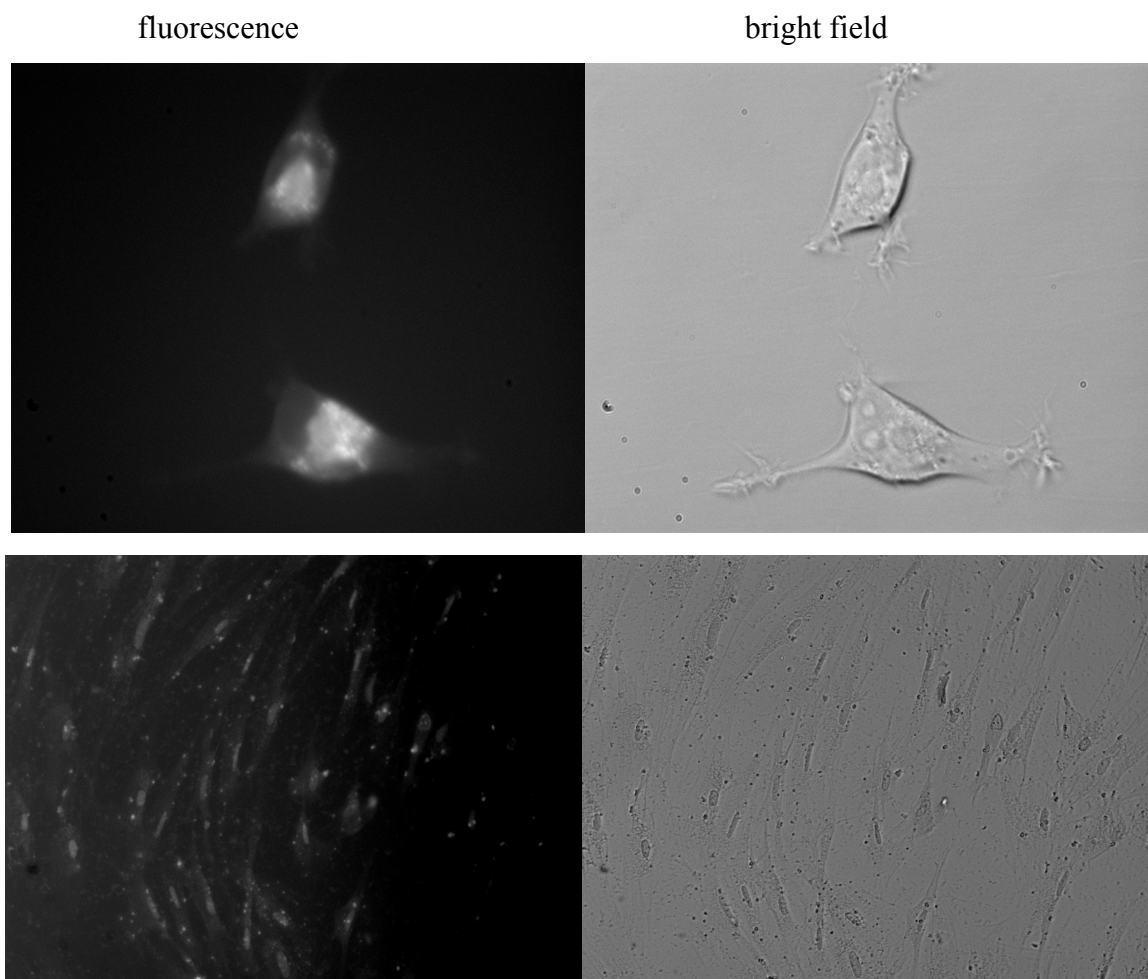

**Supplementary Fig. 7.** Top: mouse myoblasts (C2-12) incubated 12 h with 125  $\mu$ M of **4**. (Exposure = 1.5 s). Bottom: human fibroblasts incubated with a mixture of **4** and **5**. Compound shows localization especially in the nucleus of cells.

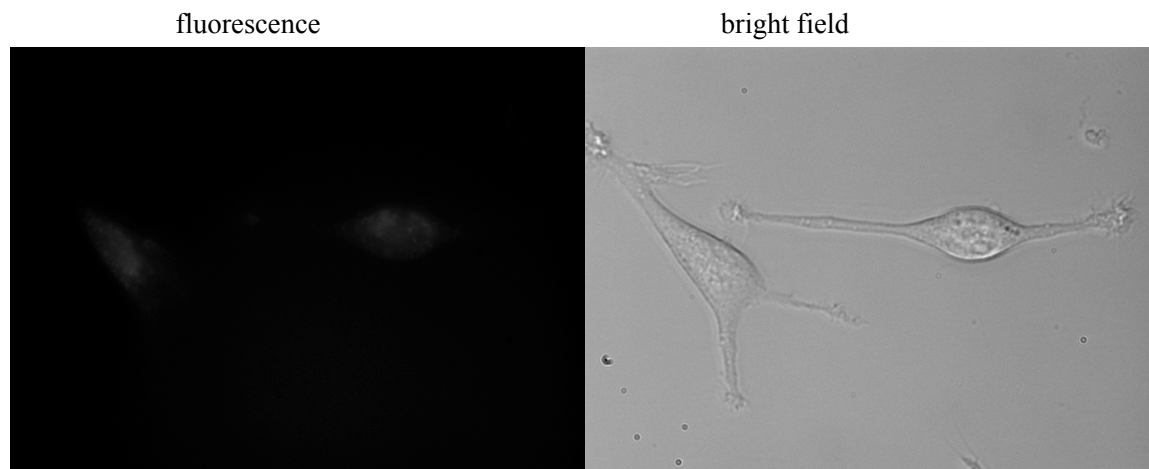

**Supplementary Fig. 8.** Mouse myoblast cells incubated 12 h with 125  $\mu\text{M}$  of **9** (exposure = 1.5 s).

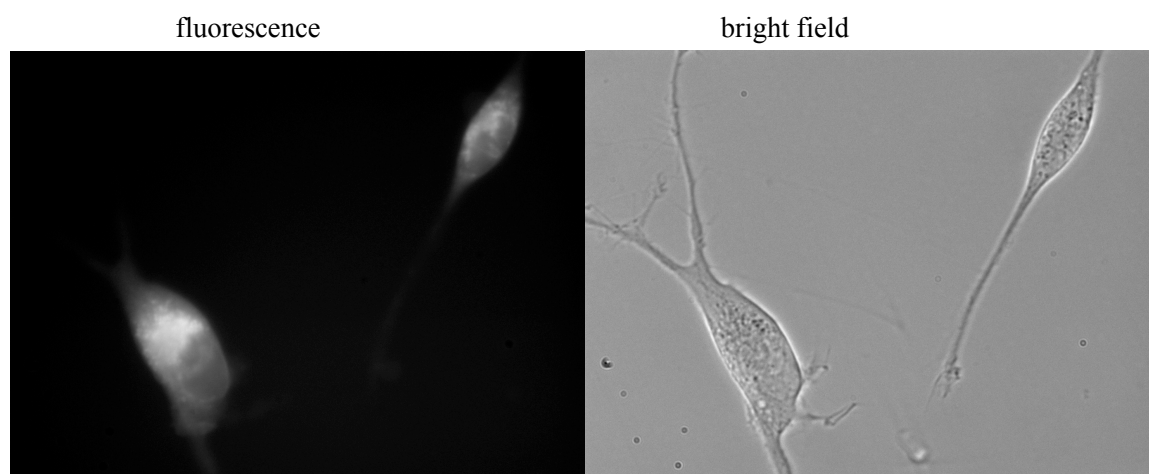

**Supplementary Fig. 9.** Mouse myoblast cells incubated 12 h with 125  $\mu\text{M}$  of **11** (exposure = 1.5 s).

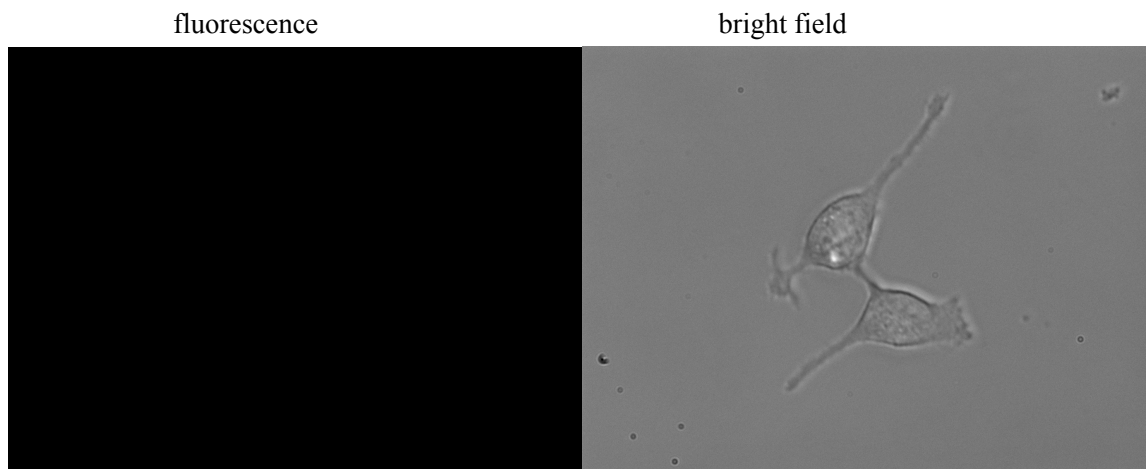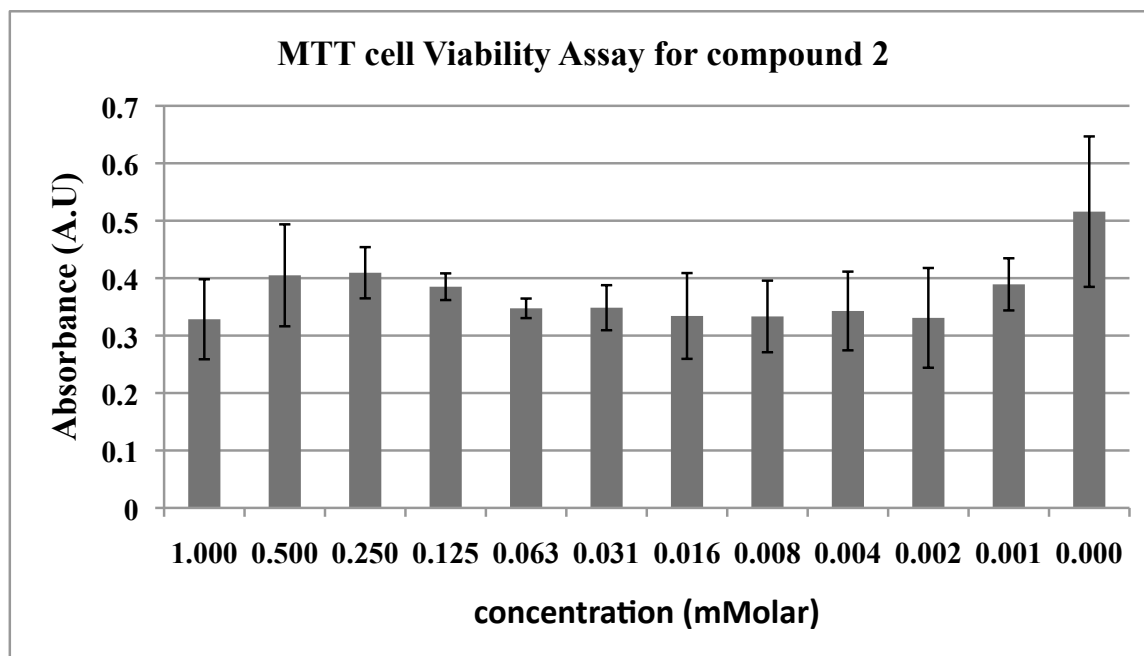

**Supplementary Fig. 10.** Top: Mouse myoblast cells incubated 12 h with 125  $\mu$ M of **2** (exposure = 1.5 s). **2** was not internalized by cells. Bottom: MTT cell viability assay of 2-ethyl benzo[g]quinoline carboxylic acid (**2**) using human fibroblast cells

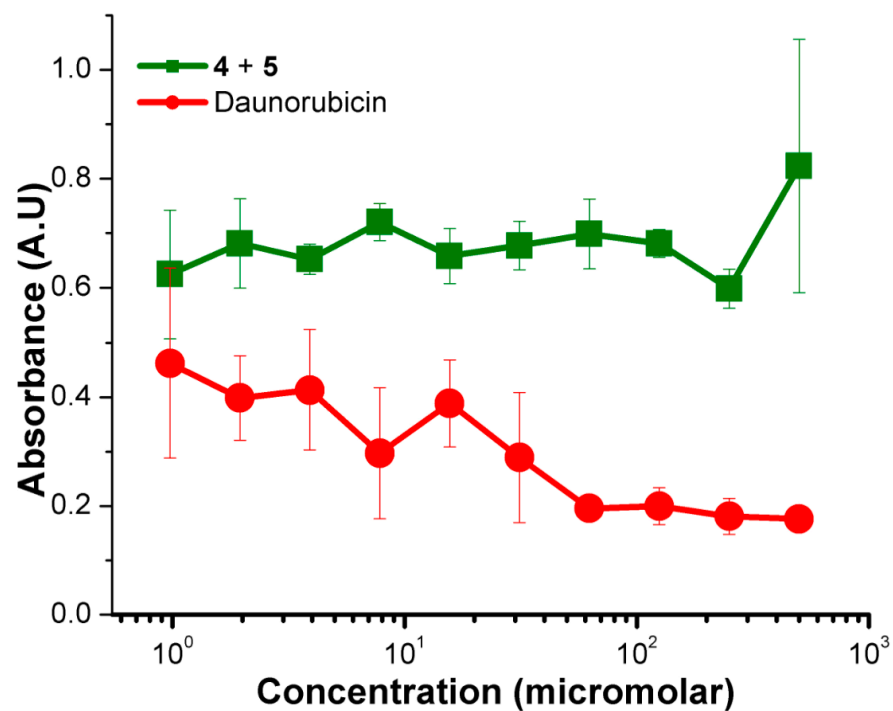

**Supplementary Fig. 11.** MTT cell viability assay of 4 and 5 (measured as a mixture) in human fibroblast cells. Toxicity of daunorubicin is shown for comparison.



**Protein Quantitation by Bradford Assay.**

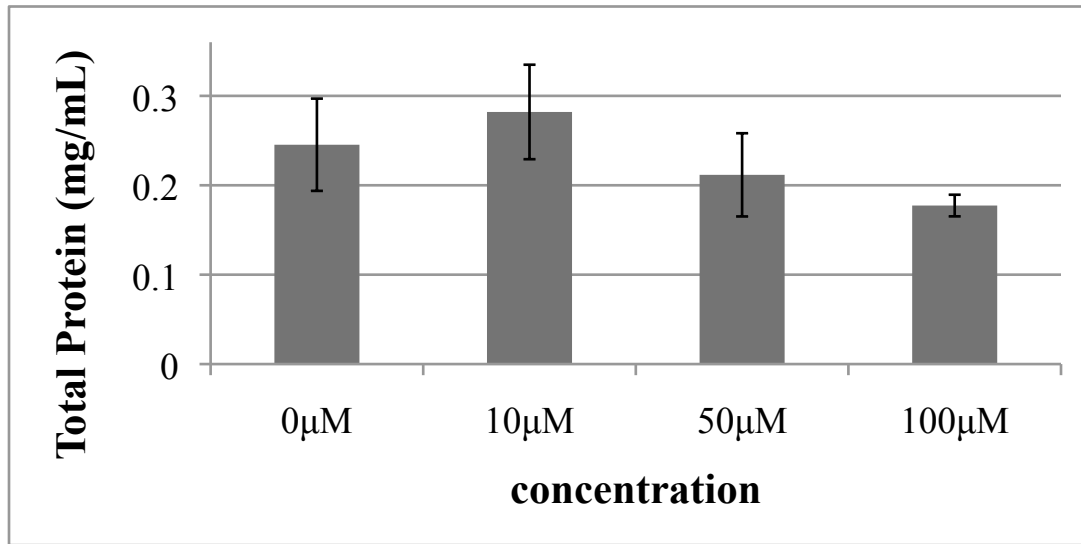

**Supplementary Fig. 12.** Total protein content of C1-S (mouse myoblasts incorporating a luciferase construct containing zero CUG repeat RNA) cells treated with various concentrations of compound 4.

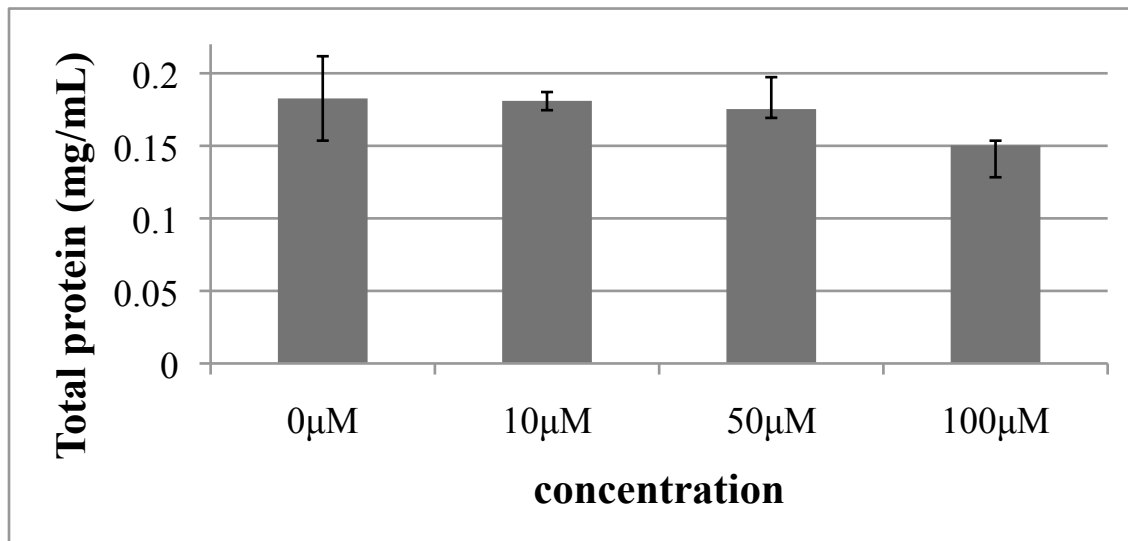

**Supplementary Fig. 13.** Total protein content of C5-14 (mouse myoblasts incorporating a firefly luciferase with 800 CUG repeats at the 3'-UTR) cells treated with various concentrations of compound 4.

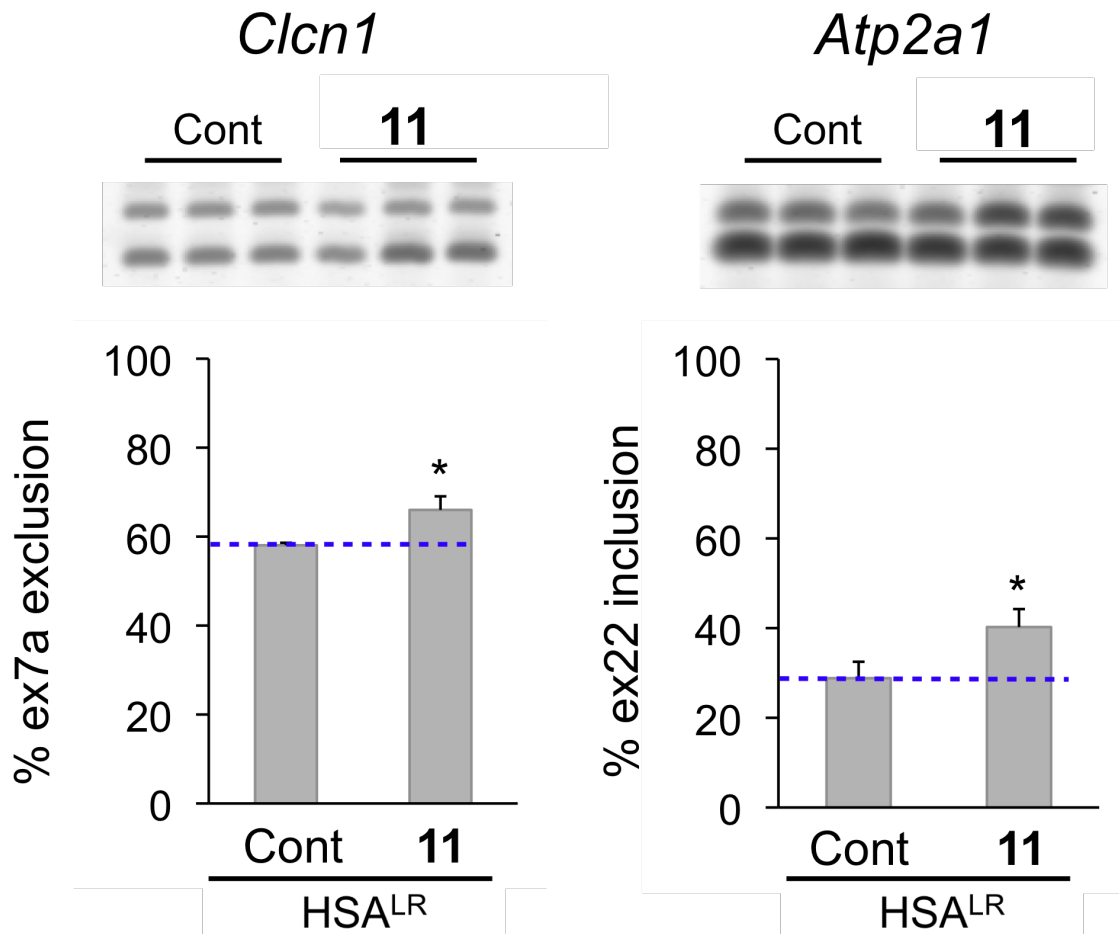

**Supplementary Figure 14:** Preliminary experiment demonstrating that compound **11** improves MBNL1-dependent splicing *in vivo*. Asterisks (\*) indicate statistical significance ( $P = 0.0113$  for *Clcn1* and  $P = 0.0230$  for *Atp2a1*); the dashed line is provided as a reference to splicing levels for  $HSA^{LR}$  mice in the absence of compound (control;  $n = 3$  each for experimental and control). A repeat of this experiment in which 5 experimental and control mice were examined is shown in Figure 7 of the main text.

**Supplementary References:**

1. Silva, P.C., Costa, J.S. & Pereira, V.L.P. AN EXPEDITIOUS SYNTHESIS OF 3-NITROPROPIONIC ACID AND ITS ETHYL AND METHYL ESTERS. *Synthetic Communications* **31**, 595–600 (2001).
2. Kienzle, F. Kienzle, F. (1980) The reaction of phthalaldehydes with 3-nitropropionates. A simple route to 3-nitro-2-naphthoic acids. *Helv. Chim. Acta* **63**, 2364-2369. *Helv. Chim. Acta* **63**, 2364–2369 (1980).
3. Kokotos, G. & Noula, C. Selective One-Pot Conversion of Carboxylic Acids into Alcohols. *J. Org. Chem.* **61**, 6994–6996 (1996).
4. Pyridinium Chlorochromate-Efficient Reagent for Oxidation of Primary and Secondary Alcohols to Carbonyl-Compounds. (1975).
5. Palde, P.B., Ofori, L.O., Gareiss, P.C., Lerea, J. & Miller, B.L. Strategies for recognition of stem-loop RNA structures by synthetic ligands: application to the HIV-1 frameshift stimulatory sequence. *J. Med. Chem.* **53**, 6018–6027 (2010).
6. Knothe, G., Bagby, M.O. & Weisleder, D. Fatty alcohols through hydroxylation of symmetrical alkenes with selenium dioxide/tert.-butylhydroperoxide. *J Am Oil Chem Soc* **72**, 1021–1026 (1995).
7. Kremminger, P. Asymmetric synthesis of unsaturated and bis-hydroxylated (S,S)-2,7-Diaminosuberic acid derivatives. *Tetrahedron*, Vol. 53, No. 20, pp. 6925-6936, (1997).
8. McNaughton, B. R. Bucholtz, K. M.; Camaano-Moure, A.; Miller, B. L. “Self-Selection in Olefin Cross Metathesis: The Effect of Remote Functionality” *Org. Lett.*, **2005**, 7, 733-736.
9. Silverstein, R.M., Webster, F.X. & Kiemle, D.J. *Spectrometric identification of organic compounds*. Seventh Edition: page 85-120 502 (Wiley: 2005).
10. Myers, A.G., Gleason, J.L., Yoon, T. & Kung, D.W. Highly Practical Methodology for the Synthesis of d- and l- $\alpha$ -Amino Acids, N-Protected  $\alpha$ -Amino Acids, and N-Methyl- $\alpha$ -amino Acids. *J. Am. Chem. Soc.* **119**, 656–673 (1997).

11. Ryan, S. J.; Zhang, Y.; Kennan, A. J., Convenient Access to Glutamic Acid Side Chain Homologues Compatible with Solid Phase Peptide Synthesis. *Org. Lett.* **2005**, *7*, (21), 4765-4767.
12. Lee, M. & Grissom, C.B. Design, Synthesis, and Characterization of Fluorescent Cobalamin Analogues with High Quantum Efficiencies. *Org. Lett.* **11**, 2499–2502 (2009).
13. Joseph R. Lakowicz, Principles of Fluorescence Spectroscopy, 2<sup>nd</sup> ed (Kluwer Academic/Plenum Publishers, 1999).
